# Supplementary material for: Palladium-catalyzed desulfitative C–P coupling of arylsulfinate metal salts and H-phosphonates
Source: Royal Society of Chemistry journal article supplement (doi:10.1039/c4ra01270d), 2014-01-01

## Supporting Information

### Palladium-Catalyzed Desulfitative C-P Coupling of Arylsulfinate

#### Metal Salts and H-phosphonates

Junchen Li, Xiaojing Bi, Hongmei Wang, Junhua Xiao\*

*State Key Laboratory of NBC Protection for Civilian, Beijing 102205, P. R. China*

\*E-mail: [xiao.junhua@pku.edu.cn](mailto:xiao.junhua@pku.edu.cn)

#### Table of Contents

|                                                                                               |     |
|-----------------------------------------------------------------------------------------------|-----|
| General procedures .....                                                                      | S2  |
| General procedure for the preparation of the arylphosphonates.....                            | S2  |
| All possible products of the model reaction determined by GC-MS.....                          | S2  |
| Plausible mechanism for the formation of the products .....                                   | S3  |
| Selected GC-MS Results. ....                                                                  | S3  |
| Characterization data for arylphosphonates.....                                               | S4  |
| <sup>1</sup> H, <sup>13</sup> C, <sup>31</sup> P NMR, and MS spectra of arylphosphonates..... | S10 |

**General procedures.** All commercially obtained reagents for the desulfurative C-P coupling reaction were used as received; sodium arylsulfonates and potassium arylsulfonates were prepared according to literature<sup>1</sup>; silver arylsulfonates were prepared according to literature<sup>2</sup>. Dipropyl phosphonate and bis(2-methoxyethyl) phosphonate were prepared according to literature<sup>3</sup>. Dichloromethane (DCE), hexane, and ethyl acetate (EA) were distilled prior to use. All reactions were carried out in the air. Reactions were monitored by thin layer chromatography (TLC) carried out on 0.25 mm E. Merck silica gel plates (60F-254) using UV light as the visualizing agent and an acidic mixture (10%) of phosphomolybdic acid, ethanol, and heat as developing agents. Qingdao haiyang silica gel (200-300 mesh) was used for flash column chromatography. NMR spectra were recorded on Bruker Advance III-400 instruments and calibrated using residual undeuterated solvent as an internal reference (TMS @ 0.00 ppm <sup>1</sup>H NMR, CHCl<sub>3</sub> @ 77.16 ppm <sup>13</sup>C NMR, no reference for <sup>31</sup>P NMR). The following abbreviations (or combinations thereof) were used to explain the multiplicities: s = singlet, d = doublet, t = triplet, q = quartet, m = multiplet, b = broad. Mass spectra were recorded on Polaris Q by electron impact ionization method.

The reactions involving microwave irradiation were conducted under air in heavy-walled glass vessel purchased from CEM. The inner diameter of the vial was 1.3 cm, and its volume, 10 mL. The microwave heating was performed in a CEM DISCOVER SCLASS focused single-mode microwave cavity using a *dynamic method*. The reaction mixtures were stirred with a magnetic stir bar at high speed during the irradiation. The temperature, pressure, and irradiation power were monitored during the course of the reactions using the provided software. The irradiation power for solvent: toluene-160W, xylene-180W, EtOAc-120W, THF-50W, DCE-50W, DMF-40W, DMSO-40W, DMF/DMSO-40W.

**General procedure for the preparation of the arylphosphonates.** Arylsulfonate metal salt (0.36 mmol or 0.18 mmol), PdCl<sub>2</sub> (0.06 mmol), Ag<sub>2</sub>CO<sub>3</sub> (0.6 mmol), DMF/DMSO (v/v = 19/1, 2 mL), and H-phosphonate (0.3 mmol) were added to the microwave tube. The tube was sealed and stirred for 20 minutes at ambient temperature. The tube was then heated at 40W for 10 minutes at 120 °C. After cooling down, the resulting suspension were filtered through a pad of celite and washed with CH<sub>2</sub>Cl<sub>2</sub>. A small amount of silica gel was added into the filtrate, and then evaporated. The residue was purified by flash chromatography on silica with hexane/ethyl acetate to provide the desired product.

#### All possible products of the model reaction determined by GC-MS.

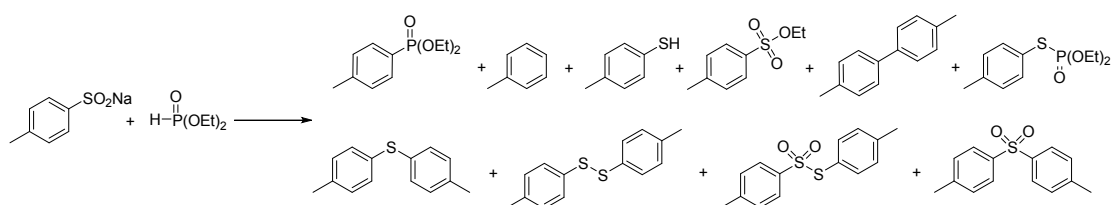

Diethyl pyrophosphate was also generated in several conditions. Due to the too many types of side products, we would like to solely employ inorganic Palladium catalysts and inorganic

<sup>1</sup> Crowell, T. A.; Halliday, B. D.; McDonald III, J. H.; Indelicato, J. M.; Pasini, C. E.; Wu, E. C. Y. *J. Med. Chem.* **1989**, *32*, 2436.

<sup>2</sup> Huang, W.-Y.; Hu, L.-Q. *J. Fluor. Chem.* **1989**, *44*, 25.

<sup>3</sup> Santschi, N.; Togni, A. *J. Org. Chem.* **2011**, *76*, 4189.

oxidants to avoid the introduction of other organic side-products. Similar product distributions were obtained with other arylsulfinate metal salts. We also ran the model reaction at 130 °C for 10h under conventional reflux condition. Relatively low conversion of diethyl phosphite and low yield were observed by GC-MS.

### Plausible mechanism for the formation of the products

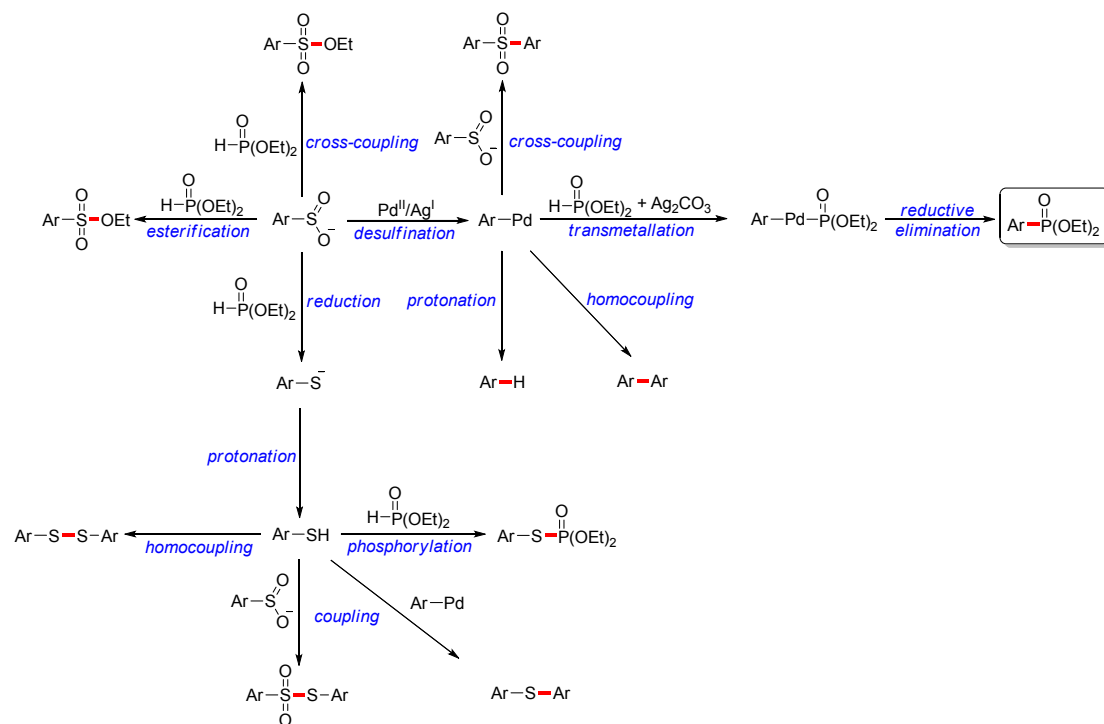

### Selected GC-MS Results.

1) Reaction carried out in the absence of  $\text{Ag}_2\text{CO}_3$  (Table 1, entry 14).

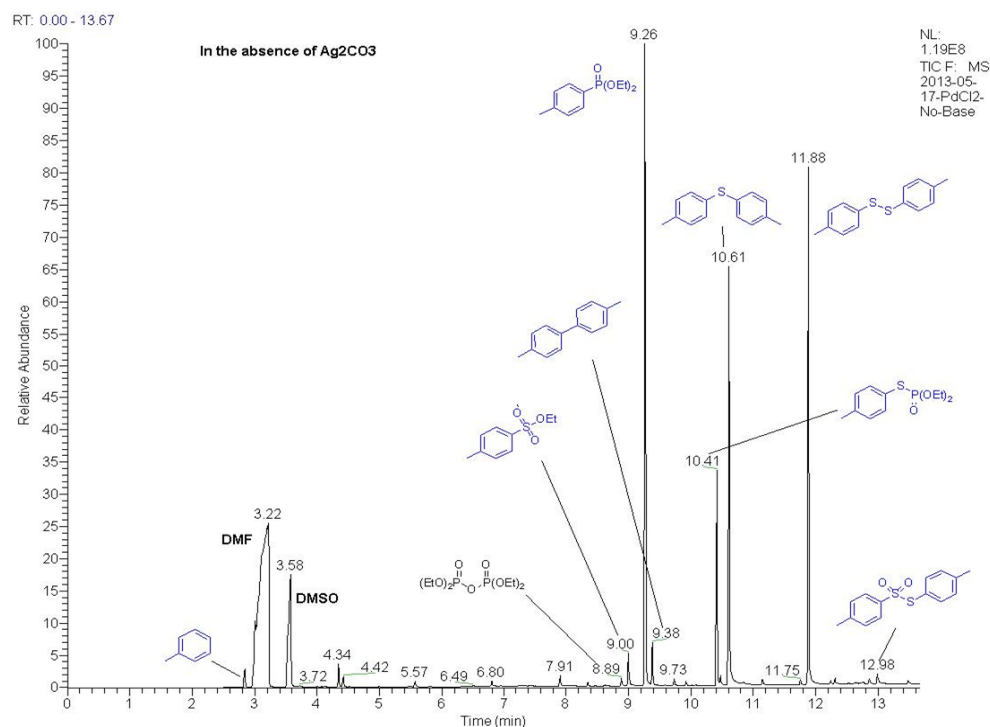

2) Reaction carried out in the absence of PdCl<sub>2</sub> (Table 1, entry 15).

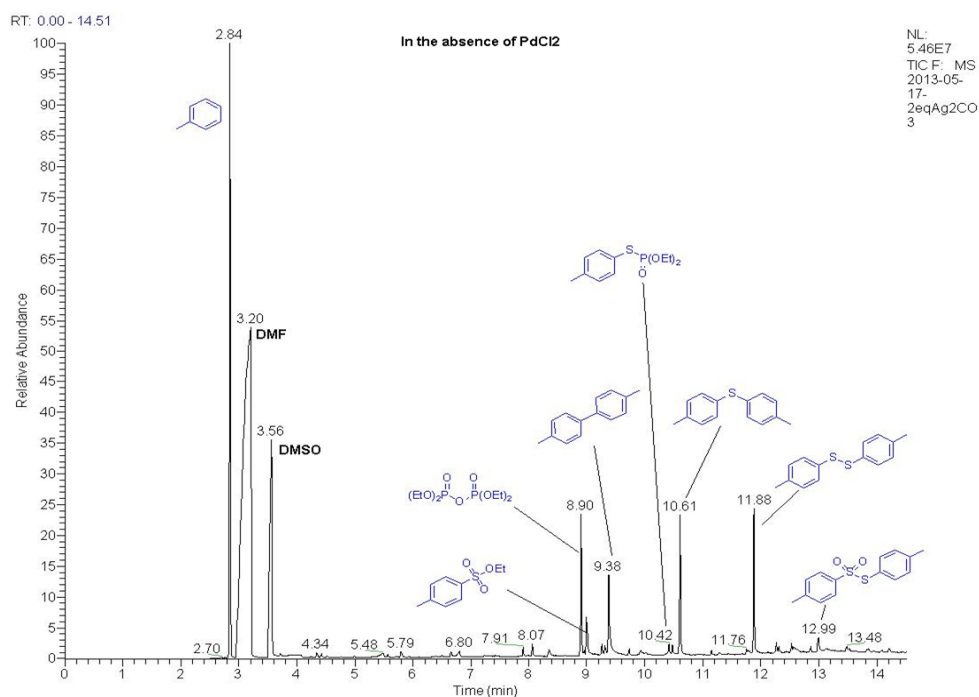

## Characterization data for arylphosphonates

### Diethyl *p*-tolylphosphonate (3a)

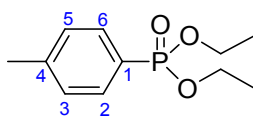

<sup>1</sup>H NMR (400 MHz, CDCl<sub>3</sub>):  $\delta$  7.70 (2H, dd, H2, H6,  $J_{2/6-P} = 13.6$  Hz,  $J_{2/6-3/5} = 7.8$  Hz), 7.28 (2H, m, H3, H5), 4.10 (4H, m, CH<sub>2</sub>), 2.40 (3H, s, C4CH<sub>3</sub>), 1.31 (6H, t, CH<sub>2</sub>CH<sub>3</sub>,  $J_{CH_3-CH_2} = 7.1$  Hz). <sup>13</sup>C NMR (100 MHz, CDCl<sub>3</sub>):  $\delta$  143.03 (d, C4,  $J = 3.0$  Hz), 131.92 (d, C2, C6,  $J = 10.3$  Hz), 129.30 (d, C3, C5,  $J = 15.4$  Hz), 125.09 (d, C1,  $J = 190.0$  Hz), 62.06 (d, CH<sub>2</sub>,  $J = 5.3$  Hz), 21.74 (C4CH<sub>3</sub>), 16.41 (d, CH<sub>2</sub>CH<sub>3</sub>,  $J = 6.6$  Hz). <sup>31</sup>P NMR (162 MHz, CDCl<sub>3</sub>):  $\delta$  19.56. MS (70 eV, EI)  $m/z$  (%): 228 (M<sup>+</sup>, 11), 200 (10), 172 (100), 155 (38), 137 (6.6), 119 (33), 108 (30.3), 91 (65.7), 65 (17).

### Dimethyl *p*-tolylphosphonate (3b)

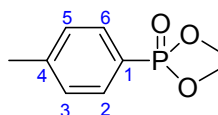

<sup>1</sup>H NMR (400 MHz, CDCl<sub>3</sub>):  $\delta$  7.69 (dd, 2H, H2, H6,  $J_{2/6-P} = 13.1$  Hz,  $J_{2/6-3/5} = 8.1$  Hz), 7.29 (dd, 2H, H3, H5,  $J_{3/5-2/6} = 8.1$  Hz,  $J_{3/5-P} = 4.1$  Hz), 3.76 (s, 3H, OCH<sub>3</sub>), 3.73 (s, 3H, OCH<sub>3</sub>), 2.41 (s, 3H, C4CH<sub>3</sub>). <sup>13</sup>C NMR (100 MHz, CDCl<sub>3</sub>):  $\delta$  143.40 (d, C4,  $J = 3.2$  Hz), 132.09 (d, C2, C6,  $J = 10.3$  Hz), 129.44 (d, C3, C5,  $J = 15.5$  Hz), 123.68 (d, C1,  $J = 191.0$  Hz), 52.73 (d, OCH<sub>3</sub>,  $J = 5.5$  Hz), 21.80 (d, C4CH<sub>3</sub>,  $J = 1.2$  Hz). <sup>31</sup>P NMR (162 MHz, CDCl<sub>3</sub>):  $\delta$  22.39. MS (70 eV, EI)  $m/z$  (%): 199 (M<sup>+</sup>-1, 51), 169 (11), 155 (36), 105 (100).

### Dipropyl *p*-tolylphosphonate (3c)

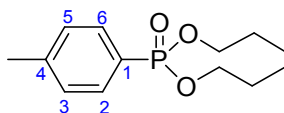

$^1\text{H}$  NMR (400 MHz,  $\text{CDCl}_3$ ):  $\delta$  7.70 (2H, dd, H2, H6,  $J_{2/6-P} = 13.1$  Hz,  $J_{2/6-3/5} = 8.1$  Hz), 7.27 (2H, dd, H3, H5,  $J_{3/5-2/6} = 7.3$  Hz,  $J_{3/5-P} = 3.7$  Hz), 3.98 (4H, m,  $\text{OCH}_2$ ), 2.40 (3H, s,  $\text{C}_4\text{CH}_3$ ), 1.69 (4H, tq,  $\text{CH}_2\text{CH}_3$ ,  $J_{\text{CH}_2-\text{CH}_2} = 7.2$  Hz,  $J_{\text{CH}_2-\text{CH}_3} = 7.2$  Hz), 0.93 (6H, t,  $\text{CH}_2\text{CH}_3$ ,  $J_{\text{CH}_3-\text{CH}_2} = 7.4$  Hz).  $^{13}\text{C}$  NMR (100 MHz,  $\text{CDCl}_3$ ):  $\delta$  142.97 (d, C4,  $J = 3.1$  Hz), 131.94 (d, C2, C6,  $J = 10.2$  Hz), 129.29 (d, C3, C5,  $J = 15.4$  Hz), 125.12 (d, C1,  $J = 190.6$  Hz), 67.56 (d,  $\text{OCH}_2$ ,  $J = 5.6$  Hz), 23.90 (d,  $\text{CH}_2\text{CH}_3$ ,  $J = 6.7$  Hz), 21.75 ( $\text{C}_4\text{CH}_3$ ), 10.18 ( $\text{CH}_2\text{CH}_3$ ).  $^{31}\text{P}$  NMR (162 MHz,  $\text{CDCl}_3$ ):  $\delta$  MS (70 eV, EI)  $m/z$  (%): 257 ( $\text{M}^+-1$ , 3.6), 215 (54), 197 (7.2), 173 (100), 155 (40), 132 (34), 117 (11), 91 (36), 65 (9).

### Diisopropyl *p*-tolylphosphonate (3d)

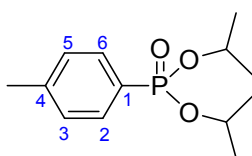

$^1\text{H}$  NMR (400 MHz,  $\text{CDCl}_3$ ):  $\delta$  7.70 (dd, 2H, H2, H6,  $J_{2/6-P} = 13.1$  Hz,  $J_{2/6-3/5} = 8.1$  Hz), 7.25 (dd, 2H, H3, H5,  $J_{3/5-2/6} = 8.1$  Hz,  $J_{3/5-P} = 4.0$  Hz), 4.67 (m, 2H, CH), 2.40 (s, 3H,  $\text{C}_4\text{CH}_3$ ), 1.36 (d, 6H,  $\text{CHCH}_3$ ,  $J_{\text{CH}_3-\text{CH}} = 6.2$  Hz), 1.22 (d, 6H,  $\text{CHCH}_3$ ,  $J_{\text{CH}_3-\text{CH}} = 6.2$  Hz).  $^{13}\text{C}$  NMR (100 MHz,  $\text{CDCl}_3$ ):  $\delta$  142.59 (d, C4,  $J = 3.2$  Hz), 131.89 (d, C2, C6,  $J = 10.2$  Hz), 129.13 (d, C3, C5,  $J = 15.4$  Hz), 126.80 (d, C1,  $J = 190.7$  Hz), 70.59 (d, CH,  $J = 5.4$  Hz), 24.19 (d,  $\text{C}_4\text{CH}_3$ ,  $J = 3.9$  Hz), 23.94 (d,  $\text{CHCH}_3$ ,  $J = 4.9$  Hz).  $^{31}\text{P}$  NMR (162 MHz,  $\text{CDCl}_3$ ):  $\delta$  17.33. MS (70 eV, EI)  $m/z$  (%): 257 ( $\text{M}^++1$ , 4), 215 (22), 182 (72), 173 (100), 167 (45), 155 (51).

### Dibutyl *p*-tolylphosphonate (3e)

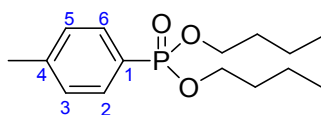

$^1\text{H}$  NMR (400 MHz,  $\text{CDCl}_3$ ):  $\delta$  7.69 (2H, dd, H2, H6,  $J_{2/6-P} = 13.1$  Hz,  $J_{2/6-3/5} = 7.4$  Hz), 7.27 (2H, m, H3, H5), 4.02 (4H, m,  $\text{OCH}_2$ ), 2.40 (3H, s,  $\text{C}_4\text{CH}_3$ ), 1.64 (4H, m,  $\text{OCH}_2\text{CH}_2$ ), 1.38 (4H, tq,  $J_{\text{CH}_2-\text{CH}_2} = 7.3$  Hz,  $J_{\text{CH}_2-\text{CH}_3} = 7.3$  Hz), 0.90 (6H, t,  $\text{CH}_2\text{CH}_3$ ,  $J_{\text{CH}_3-\text{CH}_2} = 7.4$  Hz).  $^{13}\text{C}$  NMR (100 MHz,  $\text{CDCl}_3$ ):  $\delta$  142.95 (d, C4,  $J = 3.3$  Hz), 131.94 (d, C2, C6,  $J = 10.2$  Hz), 129.28 (d, C3, C5,  $J = 15.4$  Hz), 125.11 (d, C1,  $J = 190.11$  Hz), 65.77 (d,  $\text{OCH}_2$ ,  $J = 5.6$  Hz), 32.55 (d,  $\text{OCH}_2\text{CH}_3$ ,  $J = 6.6$  Hz), 21.76 ( $\text{C}_4\text{CH}_3$ ), 18.85 ( $\text{CH}_2\text{CH}_3$ ), 13.70 ( $\text{CH}_2\text{CH}_3$ ).  $^{31}\text{P}$  NMR (162 MHz,  $\text{CDCl}_3$ ):  $\delta$  19.54. MS (70 eV, EI)  $m/z$  (%): 284 ( $\text{M}^+$ , 4), 229 (29), 173 (100), 155 (24), 146 (8), 131 (3.7), 91 (11.4), 65 (3).

### Diisobutyl *p*-tolylphosphonate (3f)

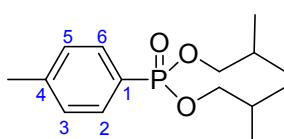

$^1\text{H}$  NMR (400 MHz,  $\text{CDCl}_3$ ):  $\delta$  7.70 (dd, 2H, H2, H6,  $J_{C-P} = 13.1$  Hz,  $J_{2/6-5/5} = 8.0$  Hz), 7.27 (dd,

2H, H3, H5,  $J_{3/5-2/6} = 8.0$  Hz,  $J_{3/5-P} = 4.0$  Hz), 3.79 (m, 4H,  $OCH_2$ ), 2.40 (s, 3H,  $C_4CH_3$ ), 1.94 (m, 2H,  $CH$ ), 0.93 (dd, 12H,  $CH_3$ ,  $J_{CH_3-P} = 6.7$  Hz,  $J_{CH_3-CH} = 1.9$  Hz).  $^{13}C$  NMR (100 MHz,  $CDCl_3$ ):  $\delta$  142.90 (d, C4,  $J = 3.2$  Hz), 131.93 (d, C2, C6,  $J = 10.2$  Hz), 129.26 (d, C3, C5,  $J = 15.4$  Hz), 125.08 (d, C1,  $J = 191.1$  Hz), 71.92 (d,  $OCH_2$ ,  $J = 6.0$  Hz), 29.26 (d,  $CH$ ,  $J = 6.8$  Hz), 21.75 (d,  $C_4CH_3$ ,  $J = 1.2$  Hz), 18.84 (d,  $CHCH_3$ ,  $J = 1.0$  Hz).  $^{31}P$  NMR (162 MHz,  $CDCl_3$ ):  $\delta$  19.24. MS (70 eV, EI)  $m/z$  (%): 285 ( $M^+$ , 2), 229 (12), 173 (100).

### Bis(2-methoxyethyl) *p*-tolylphosphonate (3h)

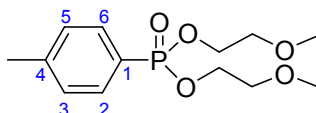

$^1H$  NMR (400 MHz,  $CDCl_3$ ):  $\delta$  7.73 (dd, 2H, H2, H6,  $J_{2/6-P} = 13.3$  Hz,  $J_{2/6-3/5} = 8.1$  Hz), 7.27 (dd, 2H, H3, H5,  $J_{3/5-2/6} = 8.1$  Hz,  $J_{3/5-P} = 4.2$  Hz), 4.19 (m, 4H,  $POCH_2$ ), 3.59 (m, 4H,  $CH_2OCH_3$ ), 3.35 (s, 6H,  $OCH_3$ ), 2.40 (s, 3H,  $C_4CH_3$ ).  $^{13}C$  NMR (100 MHz,  $CDCl_3$ ):  $\delta$  143.24 (d, C4,  $J = 3.2$  Hz), 132.09 (d, C2, C6,  $J = 10.5$  Hz), 129.30 (d, C3, C5,  $J = 15.7$  Hz), 124.56 (d, C1,  $J = 192.6$  Hz), 71.66 (d,  $CH_2OCH_3$ ,  $J = 6.6$  Hz), 64.91 (d,  $POCH_2$ ,  $J = 5.6$  Hz), 59.03 ( $OCH_3$ ), 21.80 (d,  $C_4CH_3$ ,  $J = 1.2$  Hz).  $^{31}P$  NMR (162 MHz,  $CDCl_3$ ):  $\delta$  20.52. MS (70 eV, EI)  $m/z$  (%): 289 ( $M^{+1}$ , 2), 231 (90), 201 (23), 173 (100).

### Diethyl phenylphosphonate (3i)

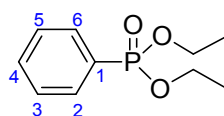

$^1H$  NMR (400 MHz,  $CDCl_3$ ):  $\delta$  7.82 (ddd, 2H, H2, H6,  $J_{2/6-P} = 13.3$  Hz,  $J_{2/6-3/5} = 8.2$  Hz,  $J_{2/6-4} = 1.3$  Hz), 7.55 (ddd, 1H, H4,  $J_{4-3/5} = 7.5$  Hz,  $J_{4-P} = J_{4-6/2} = 1.4$  Hz), 7.47 (ddd, 2H, H3, H5,  $J_{3/5-2/6} = 8.2$  Hz,  $J_{3/5-4} = 7.5$  Hz,  $J_{3/5-P} = 4.2$  Hz), 4.12 (m, 4H,  $CH_2$ ), 1.32 (t, 6H,  $CH_3$ ,  $J_{CH_3-CH_2} = 7.1$  Hz).  $^{13}C$  NMR (100 MHz,  $CDCl_3$ ):  $\delta$  132.42 (d, C4,  $J = 3.0$  Hz), 131.82 (d, C3, C5,  $J = 9.9$  Hz), 128.52 (d, C2, C6,  $J = 15.0$  Hz), 128.47 (d, C1,  $J = 187.8$  Hz), 62.15 (d,  $CH_2$ ,  $J = 5.4$  Hz), 16.40 (d,  $CH_3$ ,  $J = 6.5$  Hz).  $^{31}P$  NMR (162 MHz,  $CDCl_3$ ):  $\delta$  18.78. MS (70 eV, EI)  $m/z$  (%): 213 ( $M^{+1}$ , 17), 186 (22), 158 (71), 141 (68), 105 (72), 94 (100).

### Diethyl *m*-tolylphosphonate (3j)

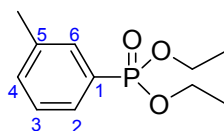

$^1H$  NMR (400 MHz,  $CDCl_3$ ):  $\delta$  7.64 (d, 1H, H6,  $J_{6-P} = 13.4$  Hz), 7.58 (m, 1H, H2), 7.35 (m, H3, H4, 2H), 4.11 (m, 4H,  $CH_2$ ), 2.40 (s, 3H,  $C_5CH_3$ ), 1.33 (t, 6H,  $CH_2CH_3$ ,  $J_{CH_3-CH_2} = 7.1$  Hz).  $^{13}C$  NMR (100 MHz,  $CDCl_3$ ):  $\delta$  138.34 (d, C5,  $J = 15.0$  Hz), 133.23 (d, C4,  $J = 3.2$  Hz), 132.35 (d, C6,  $J = 10.0$  Hz), 128.84 (d, C2,  $J = 9.7$  Hz), 128.44 (d, C3,  $J = 15.8$  Hz), 128.19 (d, C1,  $J = 186.8$  Hz), 62.09 (d,  $CH_2$ ,  $J = 5.4$  Hz), 21.37 ( $C_5CH_3$ ), 16.40 (d,  $CH_2CH_3$ ,  $J = 6.5$  Hz).  $^{31}P$  NMR (162 MHz,  $CDCl_3$ ):  $\delta$  19.28. MS (70 eV, EI)  $m/z$  (%): 228 ( $M^+$ , 19), 200 (18), 172 (100), 155 (31).

### Diethyl *o*-tolylphosphonate (3k)

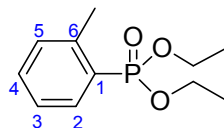

$^1\text{H}$  NMR (400 MHz,  $\text{CDCl}_3$ ):  $\delta$  7.91 (ddd, 1H, H2,  $J_{2-P} = 14.4$  Hz,  $J_{2-3} = 7.9$  Hz,  $J_{2-4} = 1.4$  Hz), 7.43 (m, 1H, H4), 7.27 (m, 2H, H3, H5), 4.12 (m, 4H,  $\text{CH}_2$ ), 2.58 (d, 3H,  $\text{C}_6\text{CH}_3$ ,  $J_{\text{C}_6\text{CH}_3-P} = 1.5$  Hz), 1.33 (t, 6H,  $J_{\text{CH}_3-\text{CH}_2} = 7.1$  Hz).  $^{13}\text{C}$  NMR (100 MHz,  $\text{CDCl}_3$ ):  $\delta$  141.89 (d, C6,  $J = 10.2$  Hz), 133.99 (d, C2,  $J = 10.3$  Hz), 132.52 (d, C4,  $J = 3.0$  Hz), 131.28 (d, C5,  $J = 14.9$  Hz), 126.92 (d, C1,  $J = 183.9$  Hz), 125.45 (d, C3,  $J = 14.9$  Hz), 61.95 (d,  $\text{CH}_2$ ,  $J = 5.5$  Hz), 21.31 (d,  $\text{C}_6\text{CH}_3$ ,  $J = 3.6$  Hz), 16.41 (d,  $\text{CH}_2\text{CH}_3$ ,  $J = 6.5$  Hz).  $^{31}\text{P}$  NMR (162 MHz,  $\text{CDCl}_3$ ):  $\delta$  19.44. MS (70 eV, EI)  $m/z$  (%): 228 ( $\text{M}^+$ , 46), 213 (90), 200 (31), 185 (47), 172 (97), 154 (100).

### Diethyl (4-(*tert*-butyl)phenyl)phosphonate (3l)

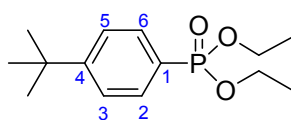

$^1\text{H}$  NMR (400 MHz,  $\text{CDCl}_3$ ):  $\delta$  7.74 (dd, 2H,  $J_{2/6-P} = 13.0$  Hz,  $J_{2/6-3/5} = 8.5$  Hz), 7.48 (dd, 2H, H3, H5,  $J_{3/5-2/6} = 8.5$  Hz,  $J_{3/5-P} = 3.9$  Hz), 4.11 (m, 4H,  $\text{CH}_2$ ), 1.33 (s, 9H,  $\text{C}(\text{CH}_3)_3$ ), 1.32 (t, 6H,  $J_{\text{CH}_3-\text{CH}_2} = 7.1$  Hz).  $^{13}\text{C}$  NMR (100 MHz,  $\text{CDCl}_3$ ):  $\delta$  155.90 (d, C4,  $J = 3.2$  Hz), 131.71 (d, C3, C5,  $J = 10.3$  Hz), 125.51 (d, C2, C6,  $J = 15.2$  Hz), 125.05 (d, C1,  $J = 190.1$  Hz), 61.99 (d,  $\text{CH}_2$ ,  $J = 5.4$  Hz), 35.07 (d,  $\text{C}(\text{CH}_3)_3$ ,  $J = 0.6$  Hz), 31.13 ( $\text{C}(\text{CH}_3)_3$ ), 16.39 (d,  $\text{CH}_2\text{CH}_3$ ,  $J = 6.6$  Hz).  $^{31}\text{P}$  NMR (162 MHz,  $\text{CDCl}_3$ ):  $\delta$  19.44. MS (70 eV, EI)  $m/z$  (%): 270 ( $\text{M}^+$ , 12), 255 (100), 242 (12), 227 (88), 214 (23), 199 (41), 181 (10).

### Diethyl (4-acetamidophenyl)phosphonate (3m)

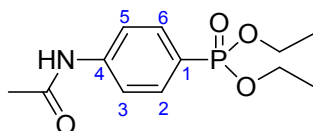

$^1\text{H}$  NMR (400 MHz,  $\text{CDCl}_3$ ):  $\delta$  9.44 (s, 1H,  $\text{NH}$ ), 7.76 (dd, 2H, H3, H5,  $J_{3/5-2/6} = 8.6$  Hz,  $J_{3/5-P} = 3.9$  Hz), 7.70 (dd, 2H, H2, H6,  $J_{2/6-P} = 12.6$  Hz,  $J_{2/6-3/5} = 8.6$  Hz), 4.08 (m, 4H,  $\text{CH}_2$ ), 2.20 (s, 3H,  $\text{COCH}_3$ ), 1.32 (t, 3H,  $\text{CH}_2\text{CH}_3$ ,  $J_{\text{CH}_3-\text{CH}_2} = 7.1$  Hz).  $^{13}\text{C}$  NMR (100 MHz,  $\text{CDCl}_3$ ):  $\delta$  169.70 (CO), 142.94 (C4), 132.71 (d, C2, C6,  $J = 10.8$  Hz), 121.91 (d, C1,  $J = 192.5$  Hz), 119.33 (d, C3, C5,  $J = 15.3$  Hz), 62.32 (d,  $\text{CH}_2$ ,  $J = 5.5$  Hz), 24.52 ( $\text{COCH}_3$ ), 16.34 (d,  $\text{CH}_2\text{CH}_3$ ,  $J = 6.5$  Hz).  $^{31}\text{P}$  NMR (162 MHz,  $\text{CDCl}_3$ ):  $\delta$  18.88. MS (70 eV, EI)  $m/z$  (%): 271 ( $\text{M}^+$ , 47), 243 (86), 229 (36), 201 (100), 173 (66), 155 (12).

### Diethyl (4-methoxyphenyl)phosphonate (3n)

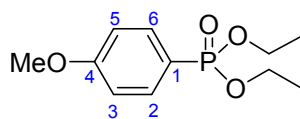

$^1\text{H}$  NMR (400 MHz,  $\text{CDCl}_3$ ):  $\delta$  7.75 (dd, 2H, H2, H6,  $J_{2/6-P} = 12.7$  Hz,  $J_{2/6-3/5} = 8.8$  Hz), 6.97 (dd, 2H, H3, H5,  $J_{3/5-2/6} = 8.8$  Hz,  $J_{3/5-P} = 3.1$  Hz), 4.09 (m, 4H,  $\text{CH}_2$ ), 3.85 (s, 3H,  $\text{OCH}_3$ ), 1.32 (t, 6H,  $\text{CH}_2\text{CH}_3$ ,  $J_{\text{CH}_3-\text{CH}_2} = 7.1$  Hz).  $^{13}\text{C}$  NMR (100 MHz,  $\text{CDCl}_3$ ):  $\delta$  162.89 (d, C4,  $J = 3.4$  Hz), 133.82 (d,

C2, C6, J = 11.3 Hz), 119.59 (d, C1, J = 194.58 Hz), 114.06 (d, C3, C5, J = 16.0 Hz), 61.95 (d, CH<sub>2</sub>, J = 5.3 Hz), 55.38 (OCH<sub>3</sub>), 16.39 (d, CH<sub>2</sub>CH<sub>3</sub>, J = 6.6 Hz). <sup>31</sup>P NMR (162 MHz, CDCl<sub>3</sub>): δ 19.70. MS (70 eV, EI) m/z (%): 244 (M<sup>+</sup>, 28), 216 (60), 188 (100), 171 (19).

#### Diethyl (4-fluorophenyl)phosphonate (3o)

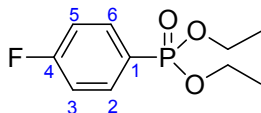

<sup>1</sup>H NMR (400 MHz, CDCl<sub>3</sub>): δ 7.82 (ddd, 2H, H2, H6, J<sub>2/6-P</sub> = 12.8 Hz, J<sub>2/6-3/5</sub> = 8.8 Hz, J = <sub>2/6-F</sub> 5.6 Hz), 7.16 (ddd, 2H, H5, H6, J<sub>3/5-F</sub> = J<sub>3/5-2/6</sub> = 8.8 Hz, J<sub>3/5-P</sub> = 3.2 Hz), 4.11 (m, 4H, CH<sub>2</sub>), 1.33 (t, 6H, CH<sub>3</sub>, J<sub>CH<sub>3</sub>-CH<sub>2</sub></sub> = 7.1 Hz). <sup>13</sup>C NMR (100 MHz, CDCl<sub>3</sub>): δ 165.50 (d, C4, J<sub>C-F</sub> = 253.5 Hz), 134.50 (dd, C2, C6, J<sub>C-P</sub> = 11.0 Hz, J<sub>C-F</sub> = 8.9 Hz), 124.68 (dd, C1, J<sub>C-P</sub> = 192.7 Hz, J<sub>C-F</sub> = 3.4 Hz), 115.96 (dd, C3, C5, J<sub>C-F</sub> = 21.4 Hz, J<sub>C-P</sub> = 16.3 Hz), 62.33 (d, CH<sub>2</sub>, J<sub>C-P</sub> = 5.4 Hz), 16.47 (d, CH<sub>3</sub>, J<sub>C-P</sub> = 6.5 Hz). <sup>31</sup>P NMR (162 MHz, CDCl<sub>3</sub>): δ 17.81. MS (70 eV, EI) m/z (%): 232 (M<sup>+</sup>, 16), 204 (21), 176 (100), 159 (39).

#### Diethyl (4-chlorophenyl)phosphonate (3p)

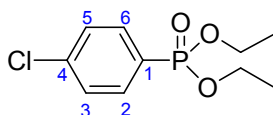

<sup>1</sup>H NMR (400 MHz, CDCl<sub>3</sub>): δ 7.75 (dd, 2H, H2, H6, J<sub>2/6-P</sub> = 12.9 Hz, J<sub>2/6-3/5</sub> = 8.5 Hz), 7.45 (dd, 2H, H3, H5, J<sub>3/5-2/6</sub> = 8.5 Hz, J<sub>3/5-P</sub> = 3.4 Hz), 4.11 (m, 4H, OCH<sub>2</sub>), 1.32 (t, 6H, CH<sub>3</sub>, J<sub>CH<sub>3</sub>-CH<sub>2</sub></sub> = 7.1 Hz). <sup>13</sup>C NMR (100 MHz, CDCl<sub>3</sub>): δ 139.05 (d, C4, J = 4.0 Hz), 133.31 (d, C2, C6, J = 10.7 Hz), 128.95 (d, C3, C5, J = 15.6 Hz), 127.13 (d, C1, J = 191.0 Hz), 62.38 (d, OCH<sub>2</sub>, J = 5.5 Hz), 16.43 (d, CH<sub>3</sub>, J = 6.5 Hz). <sup>31</sup>P NMR (162 MHz, CDCl<sub>3</sub>): δ 17.60. MS (70 eV, EI) m/z (%): 248 (M<sup>+</sup>, 19), 220 (17), 192 (100), 175 (30).

#### Diethyl (4-bromophenyl)phosphonate (3q)

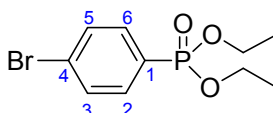

<sup>1</sup>H NMR (400 MHz, CDCl<sub>3</sub>): δ 7.68 (dd, 2H, H2, H6, J<sub>2/6-P</sub> = 12.7 Hz, J<sub>2/6-3/5</sub> = 8.5 Hz), 7.62 (dd, H3, H5, J<sub>3/5-2/6</sub> = 8.5 Hz, J<sub>3/5-P</sub> = 3.7 Hz), 4.11 (m, 4H, OCH<sub>2</sub>), 1.32 (t, 6H, CH<sub>3</sub>, J<sub>CH<sub>3</sub>-CH<sub>2</sub></sub> = 7.1 Hz). <sup>13</sup>C NMR (100 MHz, CDCl<sub>3</sub>): δ 133.40 (d, C2, C6, J = 10.6 Hz), 131.89 (d, C3, C5, J = 15.5 Hz), 127.63 (d, C4, J = 4.1 Hz), 127.60 (d, C1, J = 190.4 Hz), 62.38 (d, OCH<sub>2</sub>, J = 5.5 Hz), 16.41 (6.4 Hz). <sup>31</sup>P NMR (162 MHz, CDCl<sub>3</sub>): δ 17.73. MS (70 eV, EI) m/z (%): 294 (M<sup>+</sup>+1, 14), 292 (M<sup>+</sup>-1, 14), 265 (15), 236 (100), 221 (25), 213 (25), 185 (20), 172 (18).

#### Diethyl (4-nitrophenyl)phosphonate (3r)

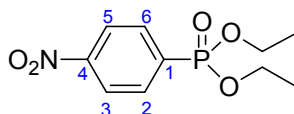

<sup>1</sup>H NMR (400 MHz, CDCl<sub>3</sub>): δ 8.32 (dd, 2H, H3, H5, J<sub>3/5-2/6</sub> = 8.4 Hz, J<sub>3/5-P</sub> = 2.8 Hz), 8.03 (dd, H2, H6, J<sub>2/6-P</sub> = 12.6 Hz, J<sub>2/6-3/5</sub> = 8.4 Hz), 4.18 (m, 4H, CH<sub>2</sub>), 1.36 (t, 6H, CH<sub>3</sub>, J<sub>CH<sub>3</sub>-CH<sub>2</sub></sub> = 7.1 Hz).



$^{13}\text{C}$  NMR (100 MHz,  $\text{CDCl}_3$ ):  $\delta$  150.24 (d, C4,  $J = 3.7$  Hz), 135.87 (d, C1,  $J = 187.2$  Hz), 132.97 (d, C2, C6,  $J = 10.5$  Hz), 123.35 (d, C3, C5,  $J = 15.3$  Hz), 62.77 (d,  $\text{CH}_2$ ,  $J = 5.7$  Hz), 16.34 (d,  $\text{CH}_3$ ,  $J = 6.2$  Hz).  $^{31}\text{P}$  NMR (162 MHz,  $\text{CDCl}_3$ ):  $\delta$  14.86. MS (70 eV, EI)  $m/z$  (%): 258 ( $\text{M}^+-1$ , 10), 242 (45), 232 (33), 214 (26), 204 (100), 186 (39).

### Diethyl (4-(trifluoromethyl)phenyl)phosphonate (3s)

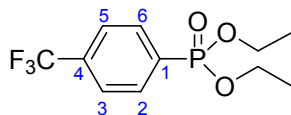

$^1\text{H}$  NMR (400 MHz,  $\text{CDCl}_3$ ):  $\delta$  7.95 (dd, 2H, H2, H6,  $J_{2/6-\text{P}} = 13.0$  Hz,  $J_{2/6-3/5} = 7.9$  Hz), 7.73 (dd, 2H, H3, H5,  $J_{3/5-2/6} = 7.9$  Hz,  $J_{3/5-\text{P}} = 3.6$  Hz), 4.15 (m, 4H,  $\text{OCH}_2$ ), 1.34 (t, 6H,  $J_{\text{CH}_3-\text{CH}_2} = 7.1$  Hz).  $^{13}\text{C}$  NMR (100 MHz,  $\text{CDCl}_3$ ):  $\delta$  134.19 (dd,  $J_{\text{C}_4-\text{F}} = 32.7$  Hz,  $J_{\text{C}_4-\text{P}} = 3.3$  Hz), 132.99 (d, C1,  $J_{\text{C}_1-\text{P}} = 187.9$  Hz), 132.36 (d, C2, C6,  $J_{\text{C}_2/\text{C}_6-\text{P}} = 10.1$  Hz), 125.45 (dq, C3, C5,  $J_{\text{C}_3/\text{C}_5-\text{P}} = 15.1$  Hz,  $J_{\text{C}_3/\text{C}_5-\text{F}} = 3.7$  Hz), 123.69 (d,  $\text{CF}_3$ ,  $J_{\text{CF}_3-\text{F}} = 272.8$  Hz), 62.63 (d,  $\text{CH}_2$ ,  $J_{\text{CH}_2-\text{P}} = 5.5$  Hz), 16.46 (d,  $\text{CH}_3$ ,  $J_{\text{CH}_3-\text{P}} = 6.4$  Hz).  $^{31}\text{P}$  NMR (162 MHz,  $\text{CDCl}_3$ ):  $\delta$  16.26. MS (70 eV, EI)  $m/z$  (%): 281 ( $\text{M}^+-1$ , 11), 263 (11), 255 (18), 227 (100), 209 (43), 189 (7), 172 (23), 162 (30).

### Diethyl naphthalen-2-ylphosphonate (3t)

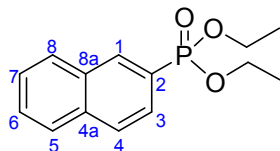

$^1\text{H}$  NMR (400 MHz,  $\text{CDCl}_3$ ):  $\delta$  8.44 (d, 1H, H1,  $J_{1-\text{P}} = 15.1$  Hz), 7.92 (m, 2H, H8, H4), 7.88 (d, 2H, H5,  $J = 7.9$  Hz), 7.77 (ddd, 1H, H3,  $J_{3-\text{P}} = 10.9$  Hz,  $J_{3-4} = 8.4$  Hz,  $J_{3-1} = 1.4$  Hz), 7.58 (m, 2H, H6, H7), 4.16 (m, 4H,  $\text{CH}_2$ ), 1.34 (t, 6H,  $\text{CH}_3$ ,  $J_{\text{CH}_3-\text{CH}_2} = 7.1$  Hz).  $^{13}\text{C}$  NMR (100 MHz,  $\text{CDCl}_3$ ):  $\delta$  135.09 (d, C4a,  $J = 2.7$  Hz), 134.14 (d, C1,  $J = 10.2$  Hz), 132.44 (d, C8a,  $J = 16.6$  Hz), 129.02 (C8), 128.46 (d, C4,  $J = 14.3$  Hz), 128.1 (C5), 127.90 (d, C6,  $J = 0.7$  Hz), 126.97 (d, C7,  $J = 1.1$  Hz), 126.54 (d, C3,  $J = 9.8$  Hz), 125.52 (d, C2,  $J = 187.9$  Hz), 62.46 (d,  $\text{CH}_2$ ,  $J = 5.3$  Hz), 16.46 (d,  $\text{CH}_3$ ,  $J = 6.5$  Hz).  $^{31}\text{P}$  NMR (162 MHz,  $\text{CDCl}_3$ ):  $\delta$  19.08. MS (70 eV, EI)  $m/z$  (%): 264 ( $\text{M}^+$ , 84), 236 (100), 208 (92), 190 (26), 155 (35).

$^1\text{H}$ ,  $^{13}\text{C}$ ,  $^{31}\text{P}$  NMR, and MS spectra of arylphosphonates.

3a

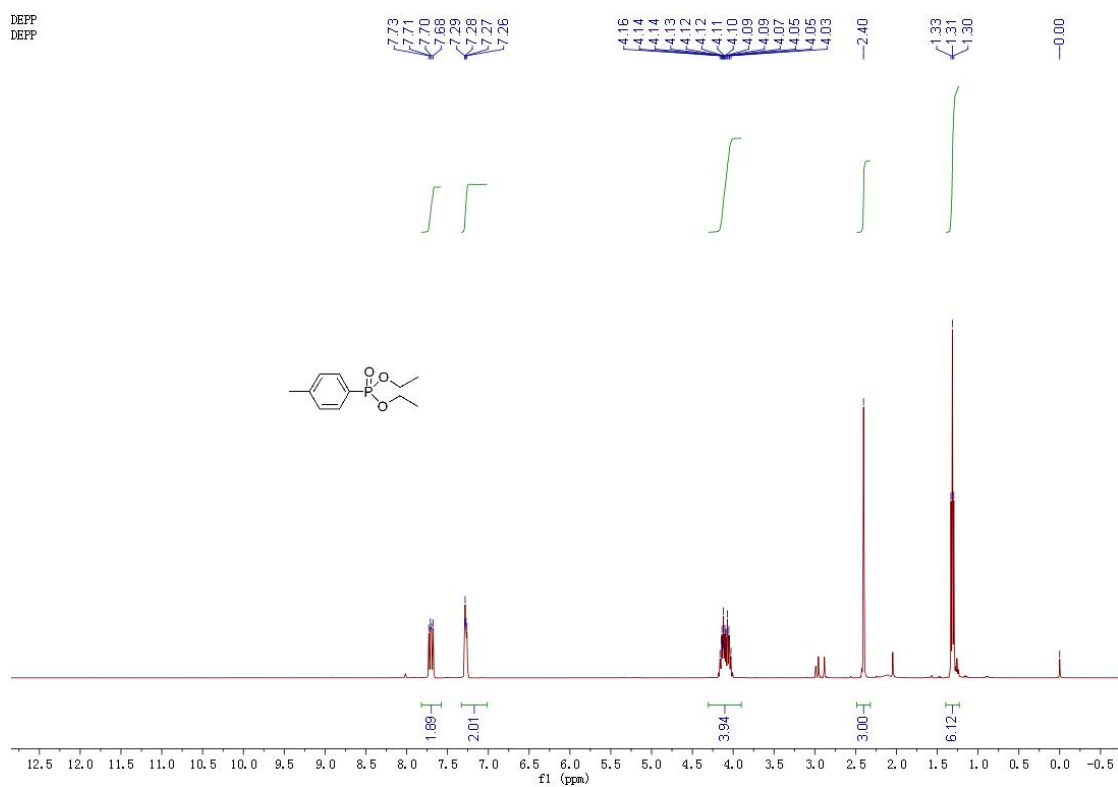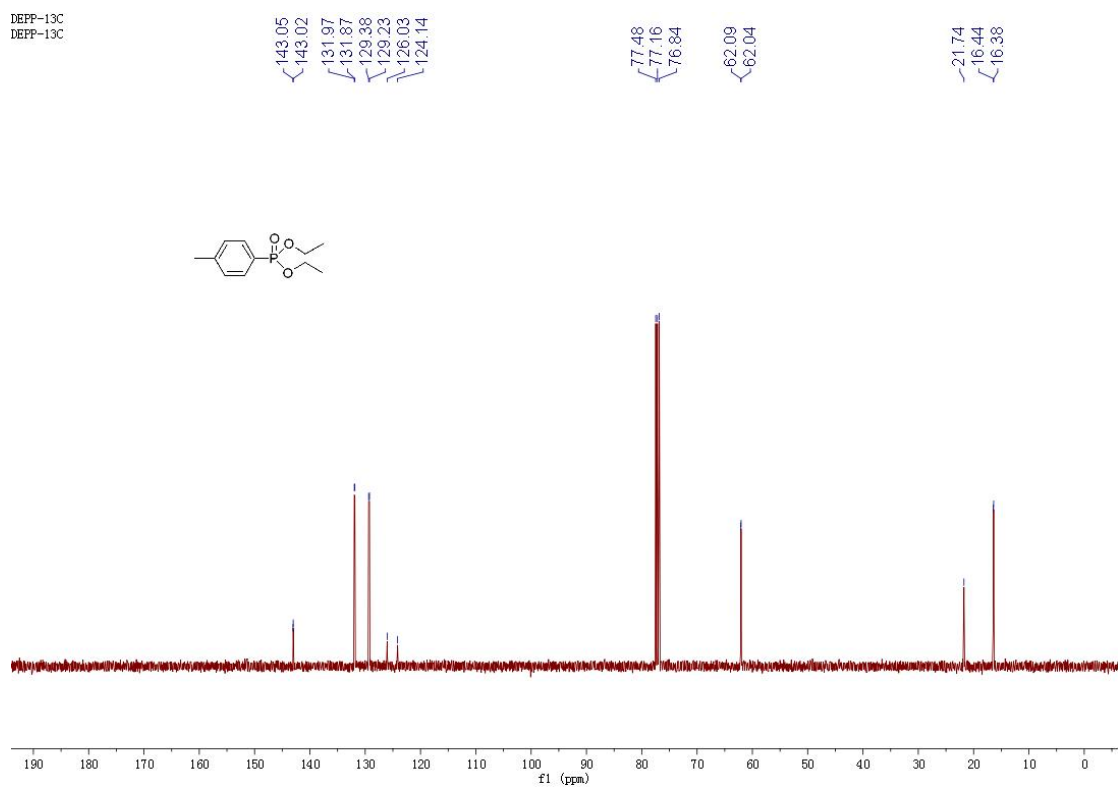

### 3a

DEFF-31P  
DEFF-31P

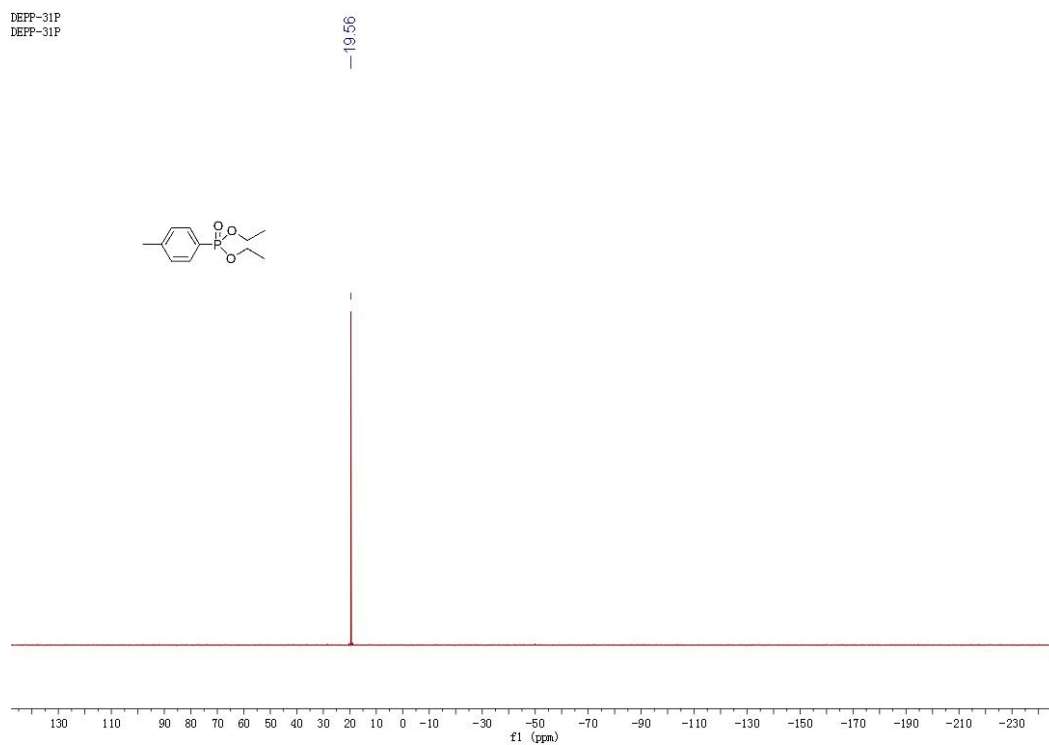

2013-08-19-02eqPdCl2.2eqAg2CO3-HP(O)(OEt)2 #720 RT: 9.17 AV: 1 NL: 4.59E6  
T: + c Full ms [ 50.00-600.00]

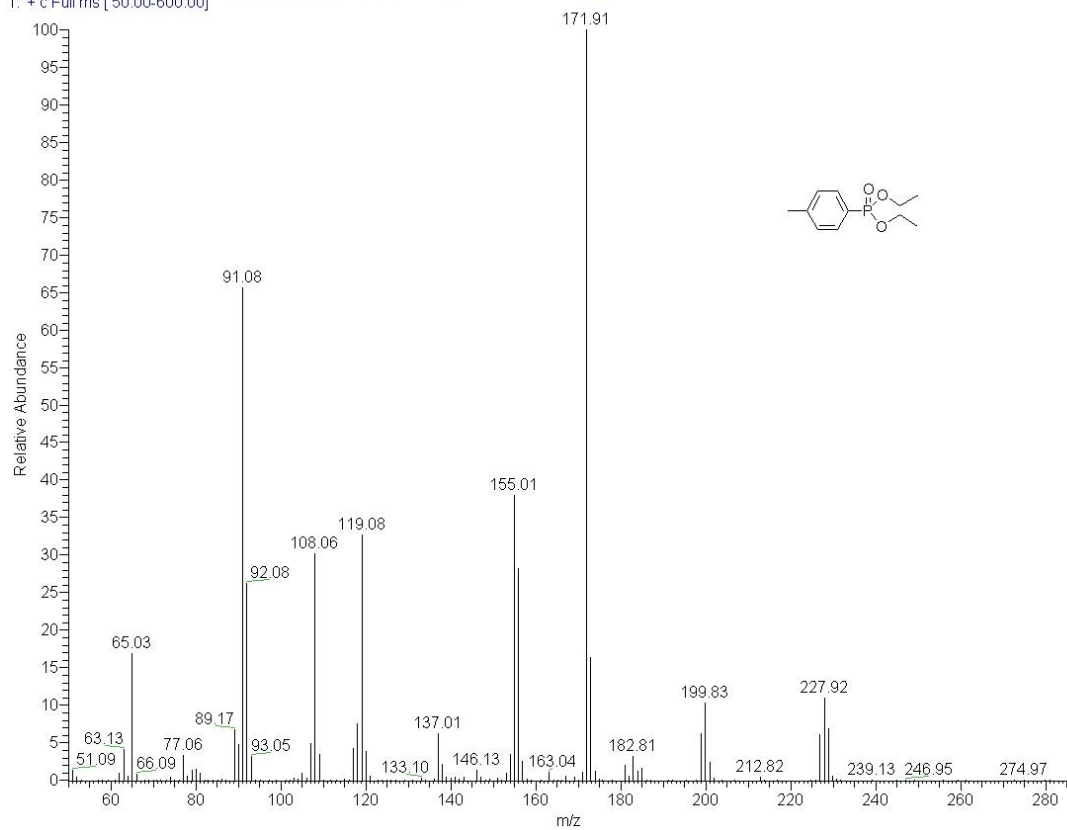

3b

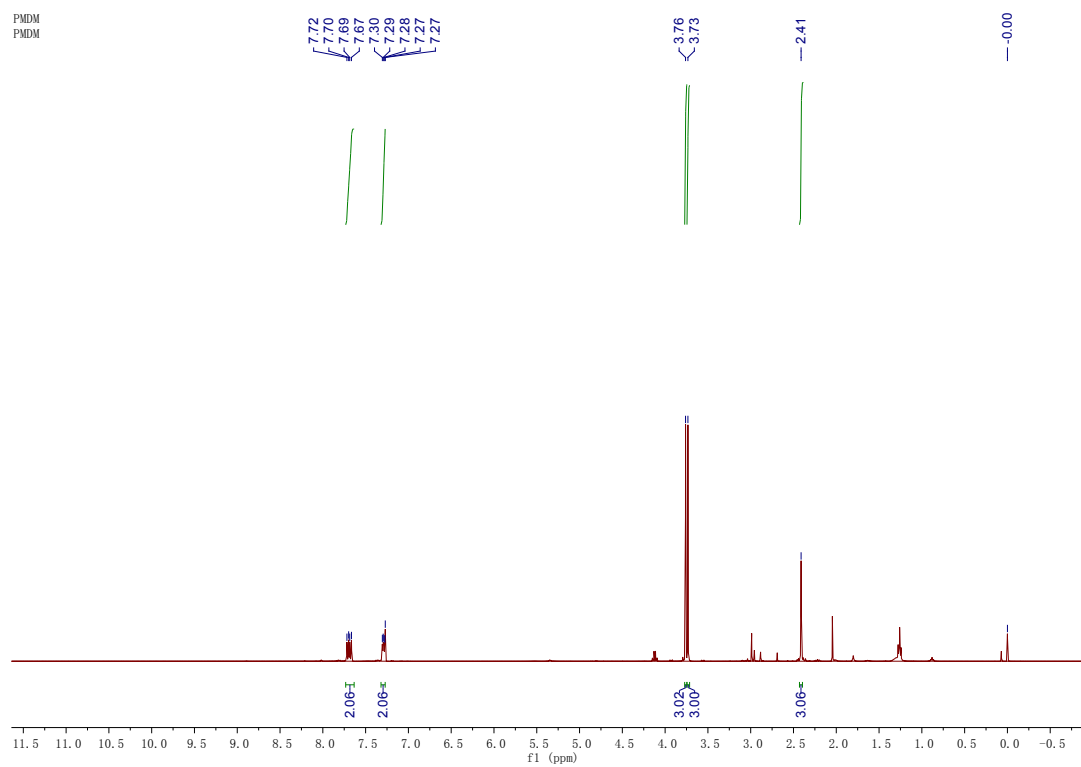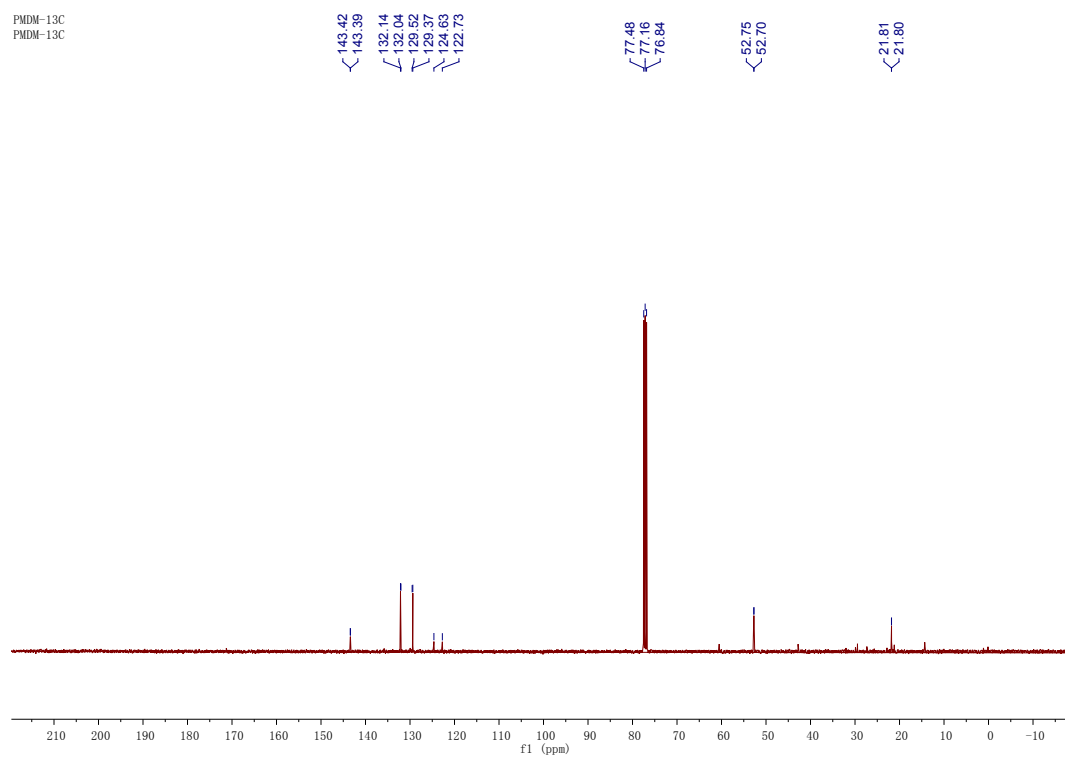

3b

PMDM-31P  
PMDM-31P

22.39

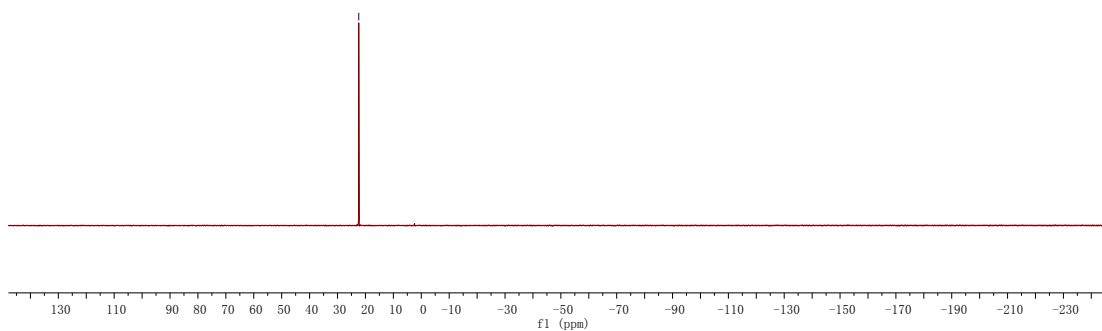

2013-11-22-4-Me-Ph-P(O)(OMe)2 #481 RT: 8.50 AV: 1 NL: 3.59E5  
T: + c Full ms [50.00-600.00]

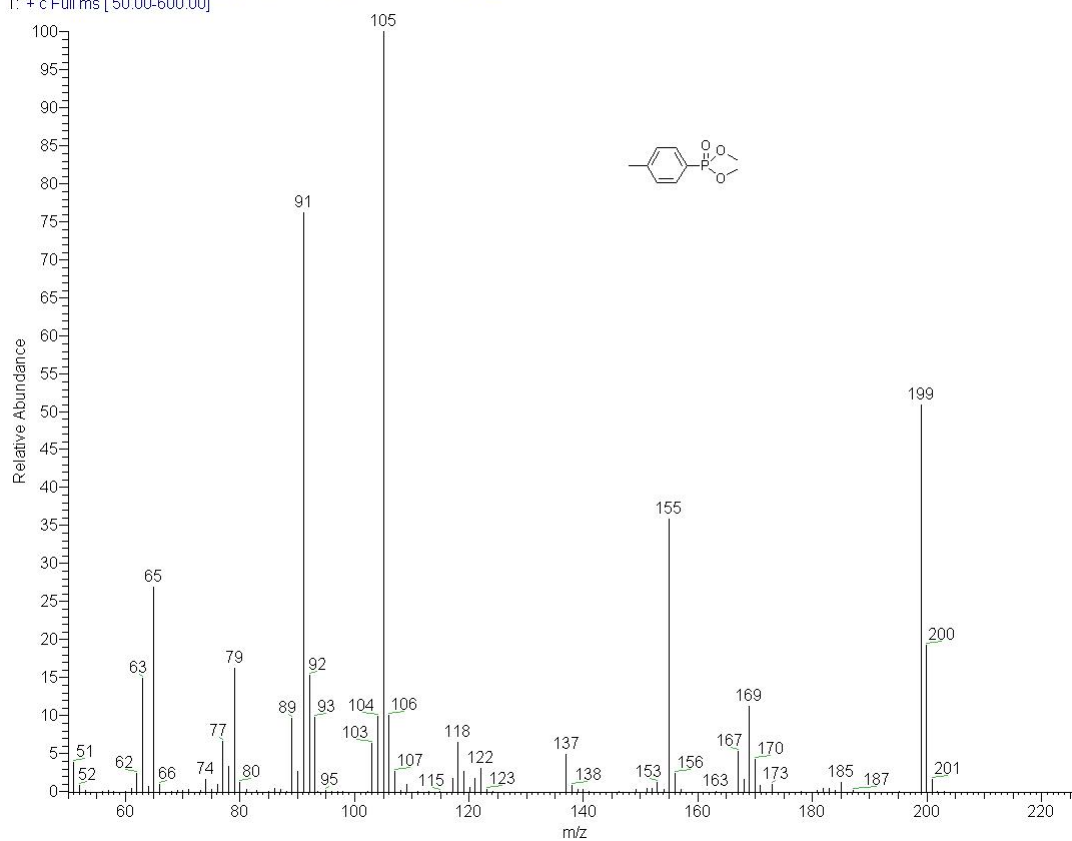

3c

DFPP  
DFPP

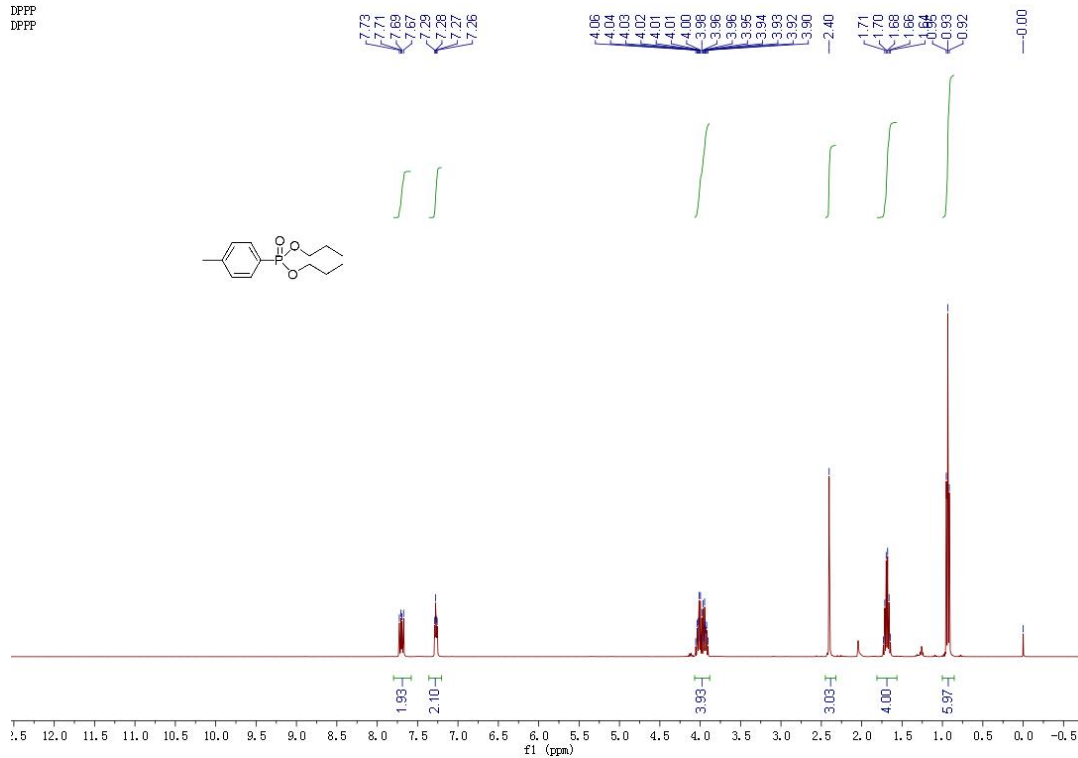

DFPP-13C  
DFPP-13C

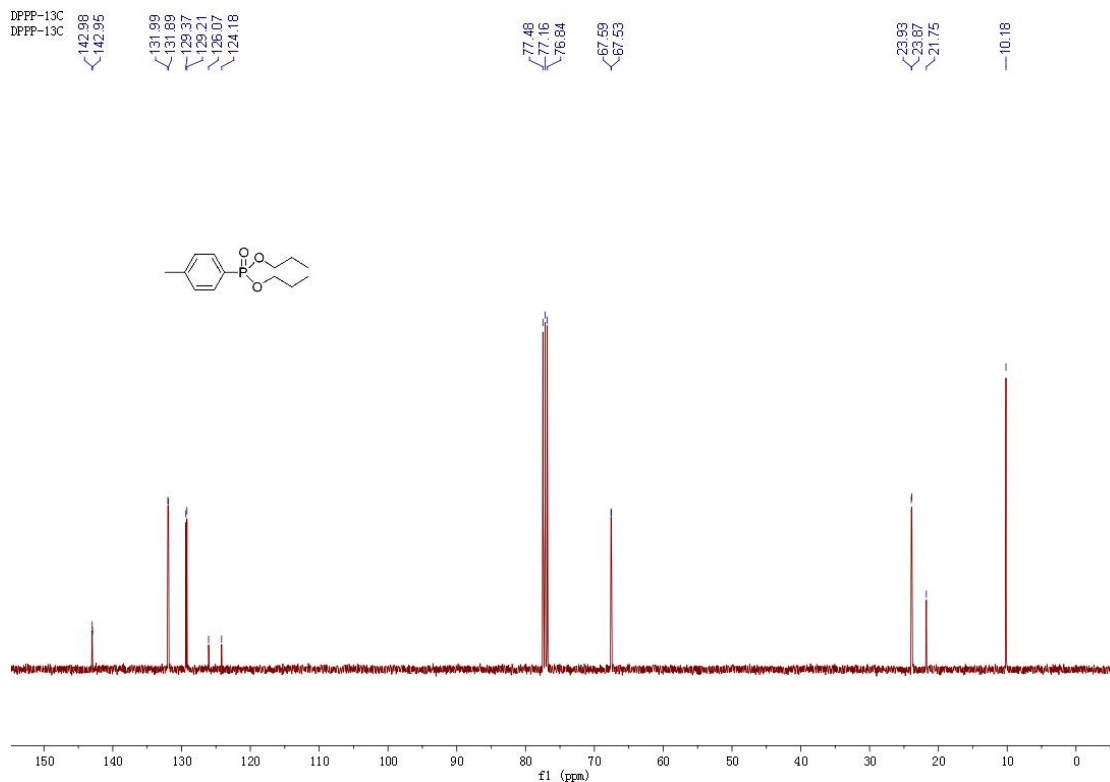

3c

DPPP-31P  
DPPP-31P

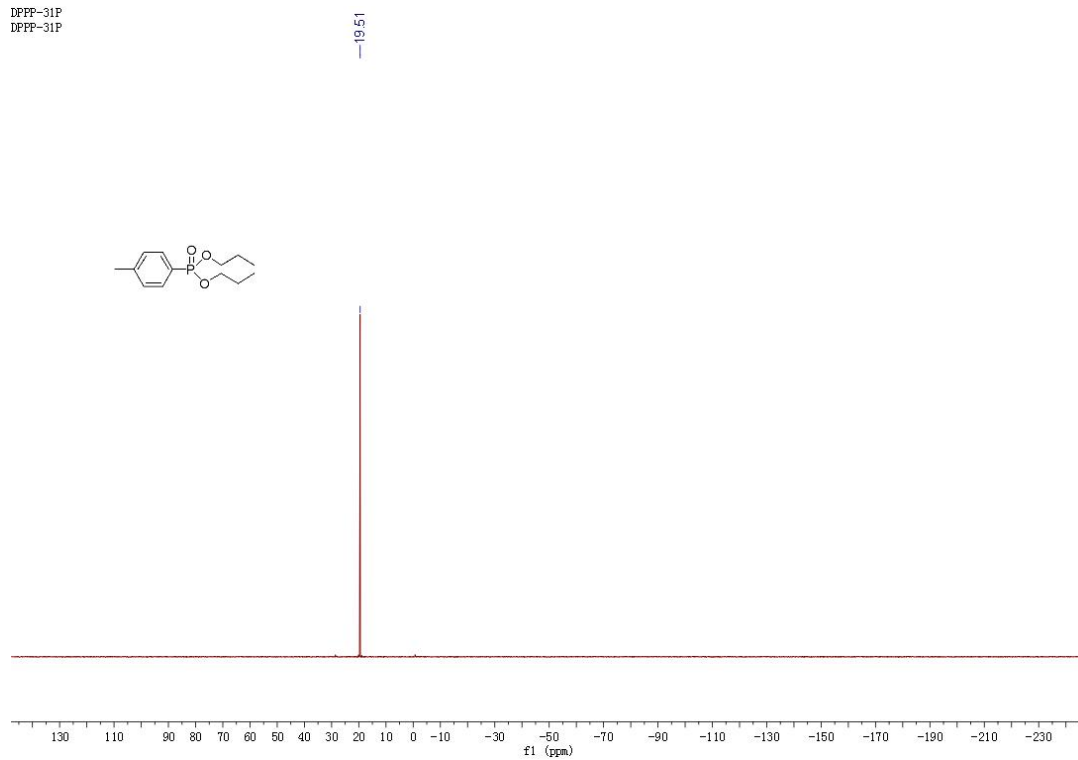

2013-11-08-4-Me-Ph-P(OnPr)2-1 #636 RT: 10.11 AV: 1 NL: 1.35E7  
T: + c Full ms [50.00-600.00]

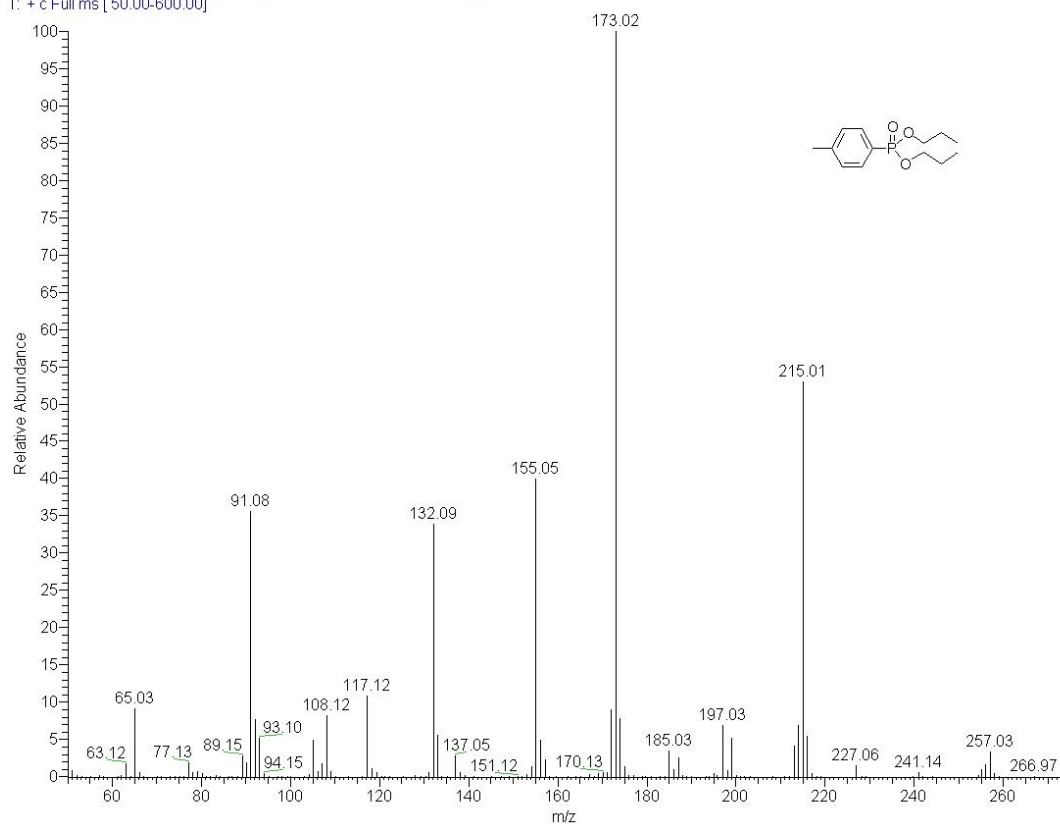

3d

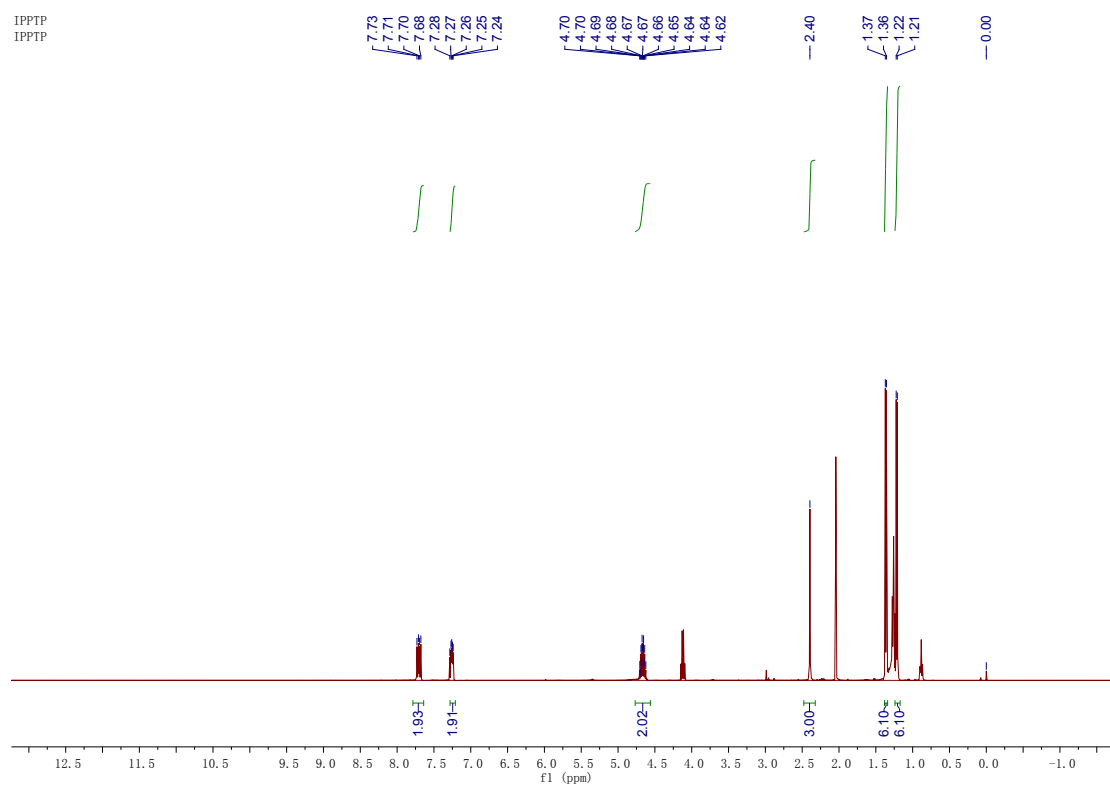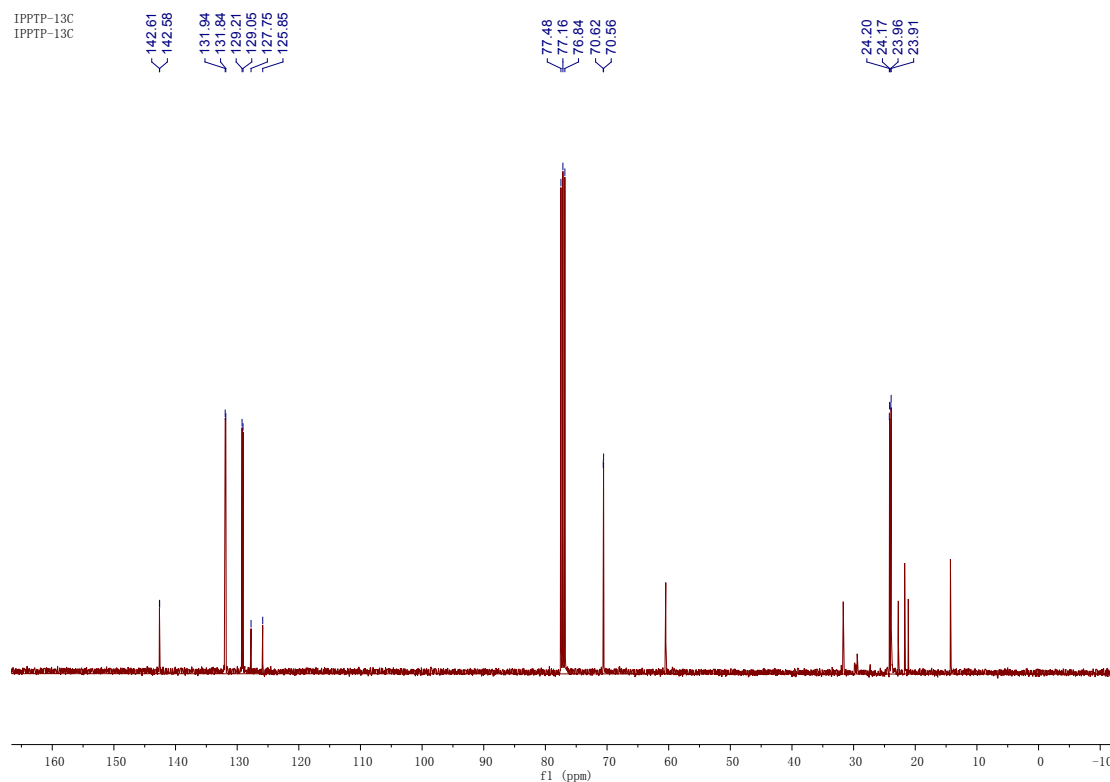



3d

IPPTP-31P  
IPPTP-31P

— 17.33

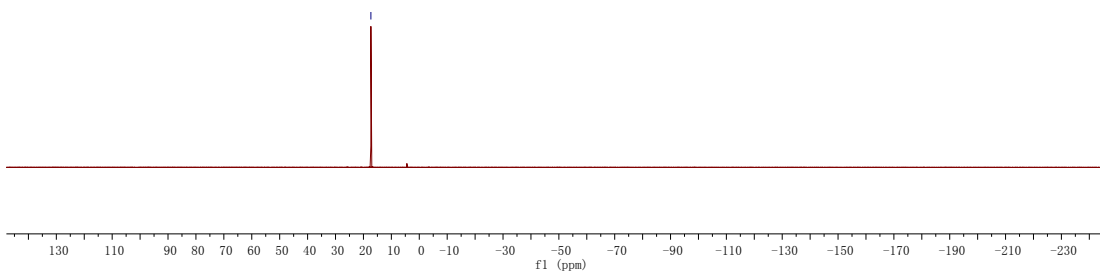

2013-12-11-4-Me-Ph-P(O)(OiPr)2 #554 RT: 9.22 AV: 1 NL: 1.35E6  
T: + c Full ms [50.00-600.00]

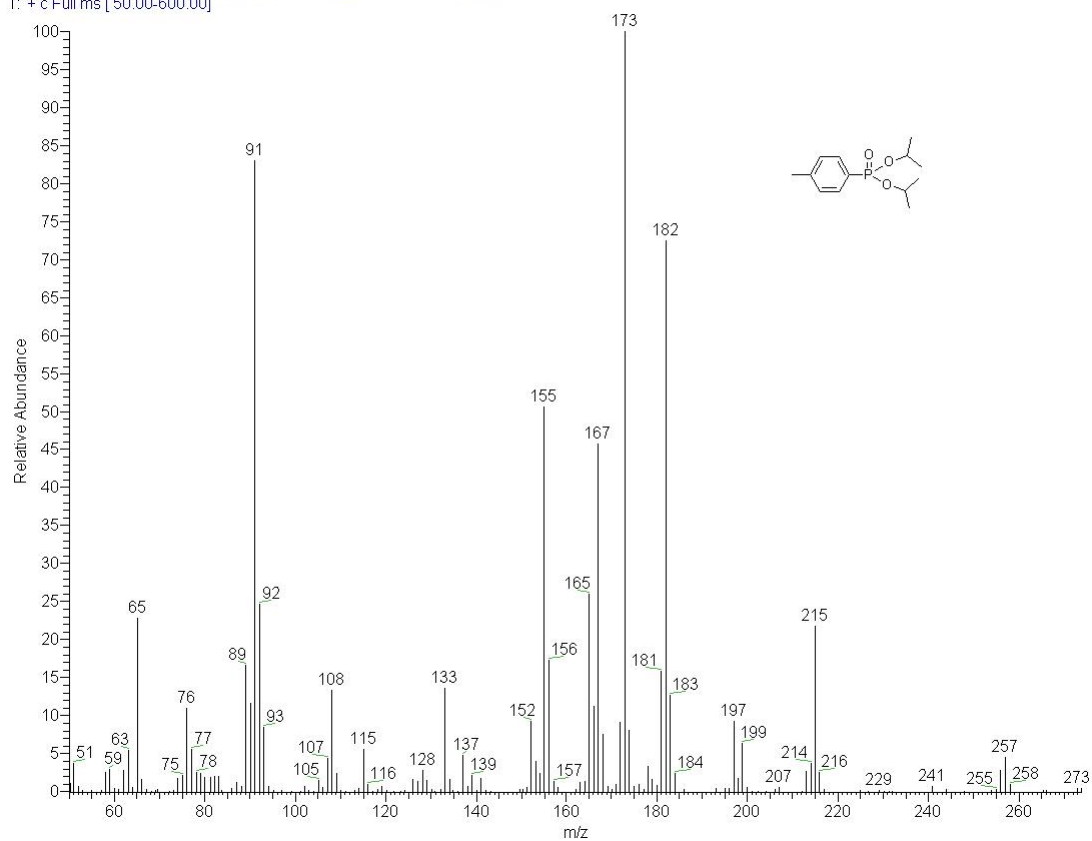

3e

DTPP  
DTPP

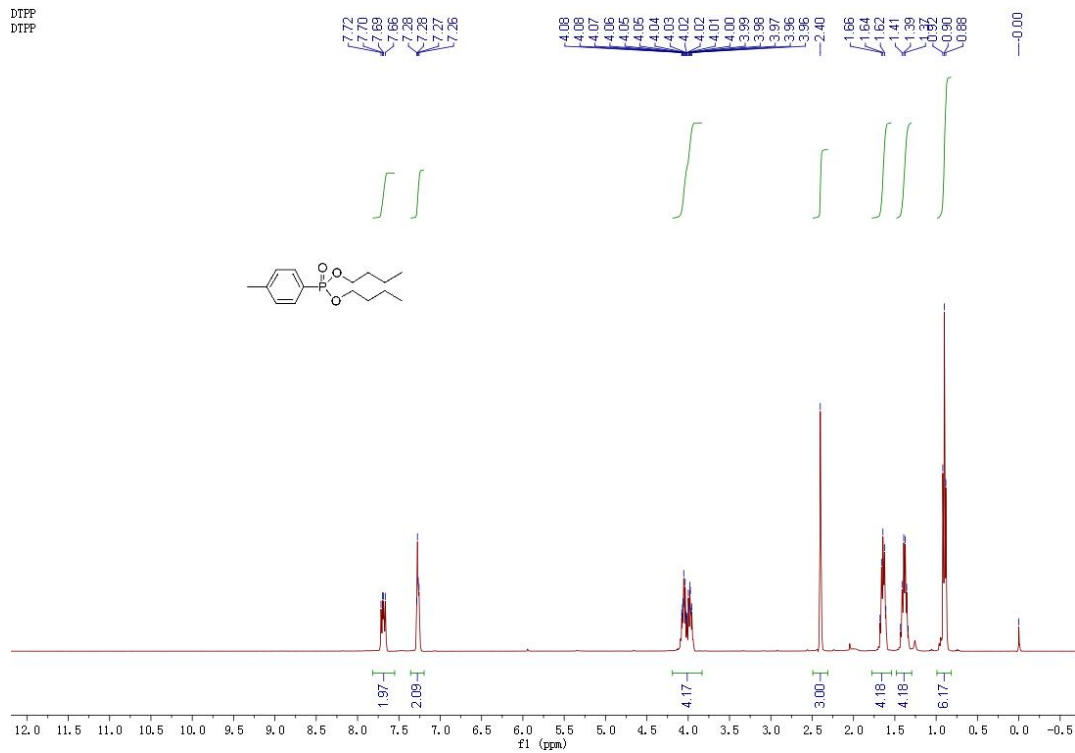

DTPP-13C  
DTPP-13C

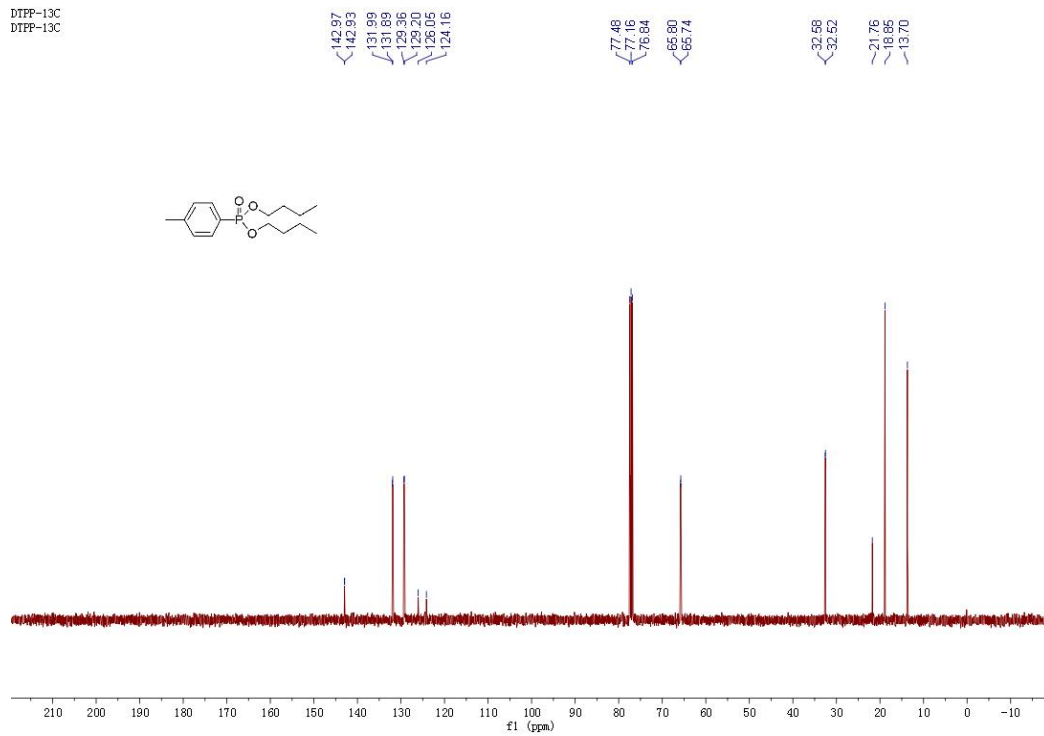

3e

DTFP-31P  
DTFP-31P

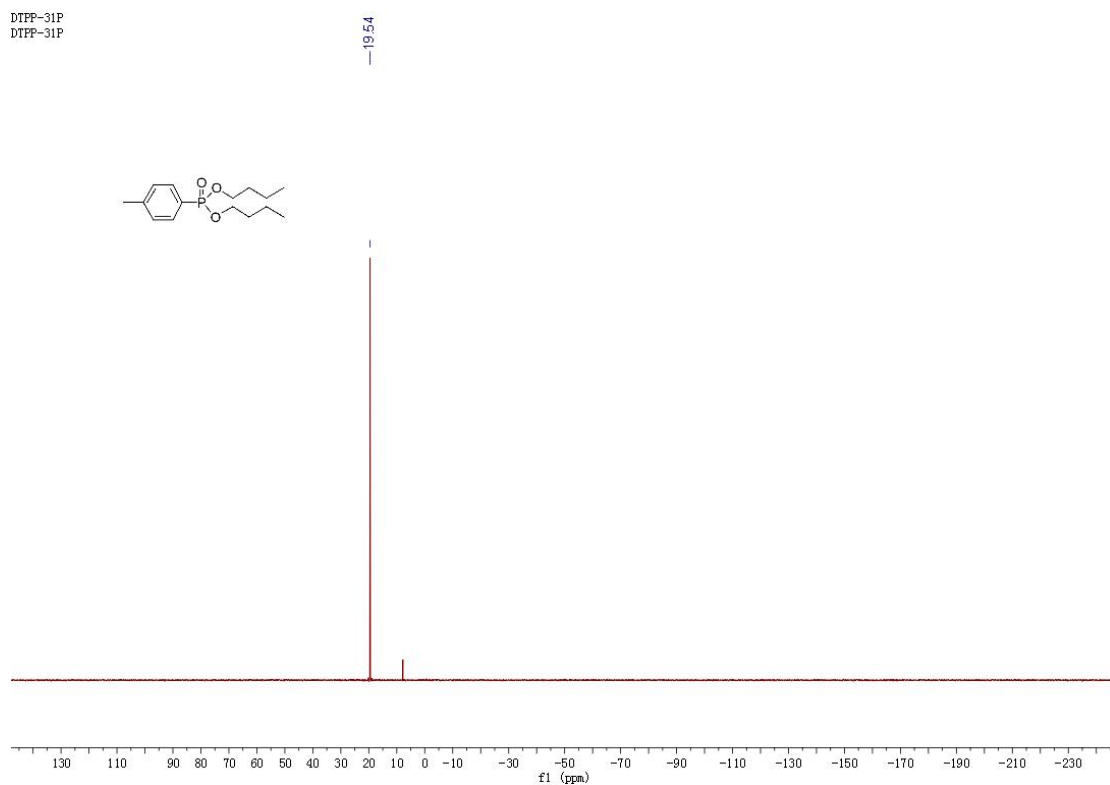

2013-08-04-02eqPdCl2-2eqAg2O-HP(O)(OnBu)2 #936 RT: 11.09 AV: 1 NL: 1.01E8  
T: + c Full ms [ 50.00-600.00]

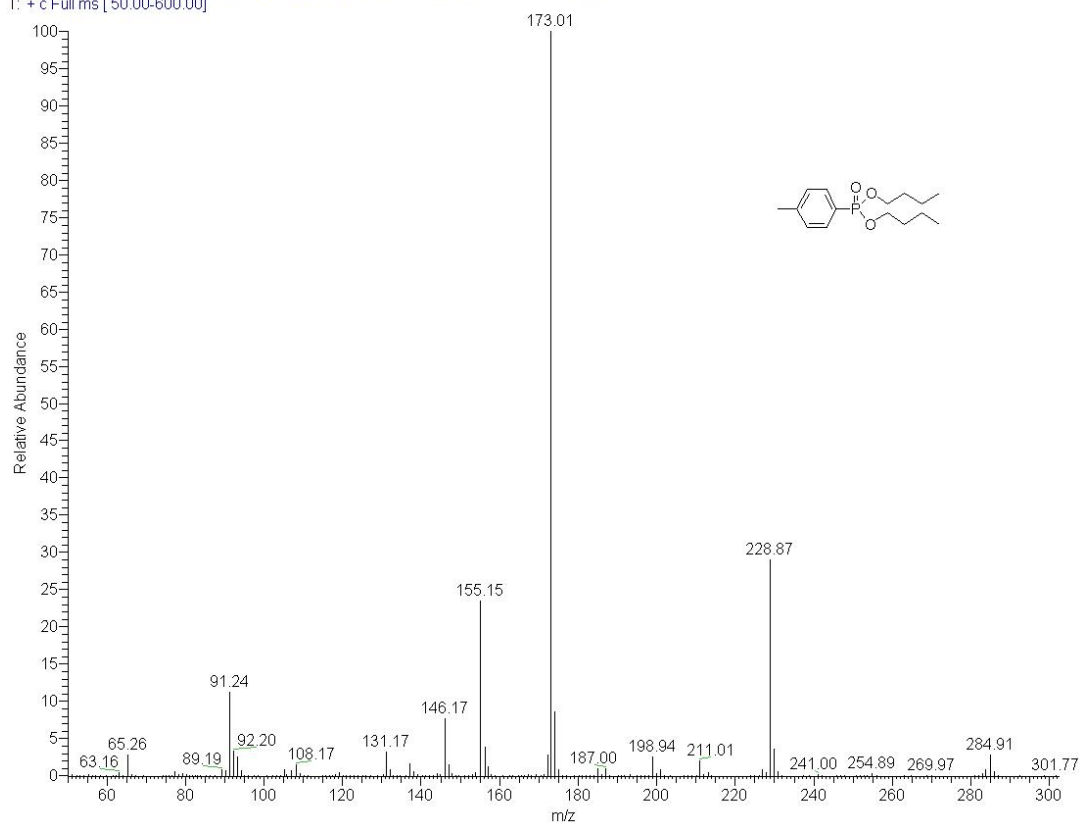

3f

PMD1B  
PMD1B

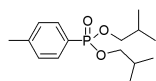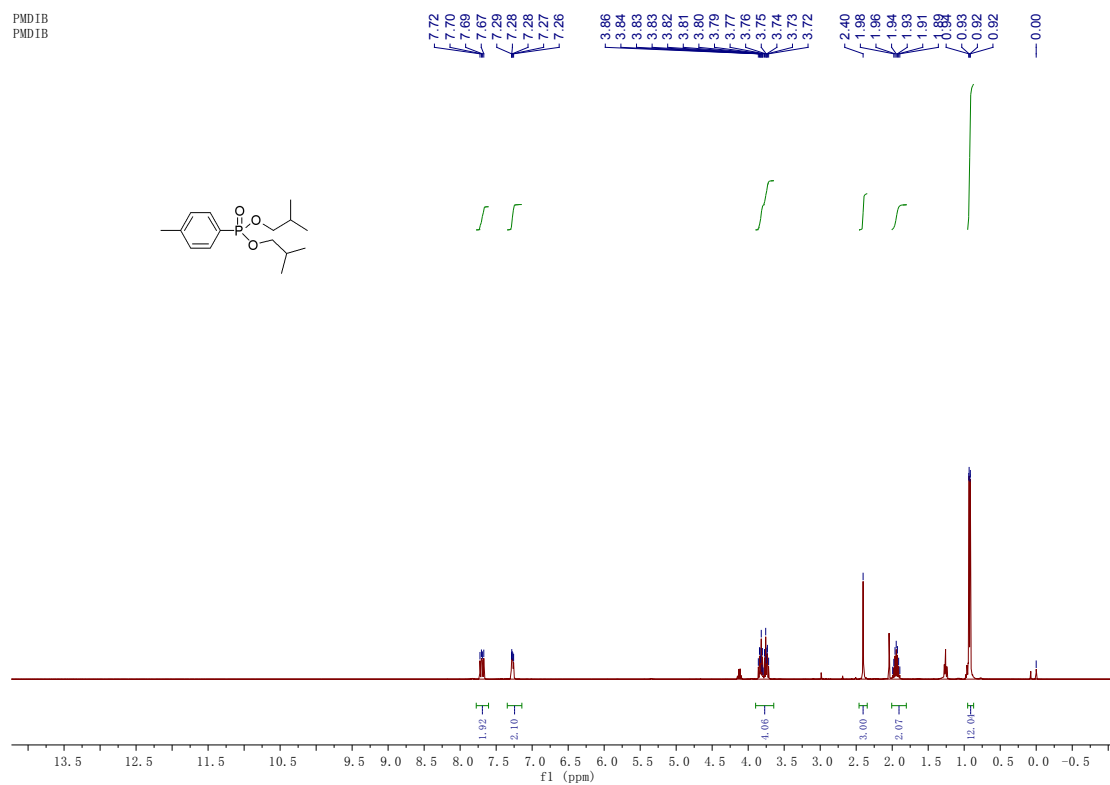

PMD1B-13C  
PMD1B-13C

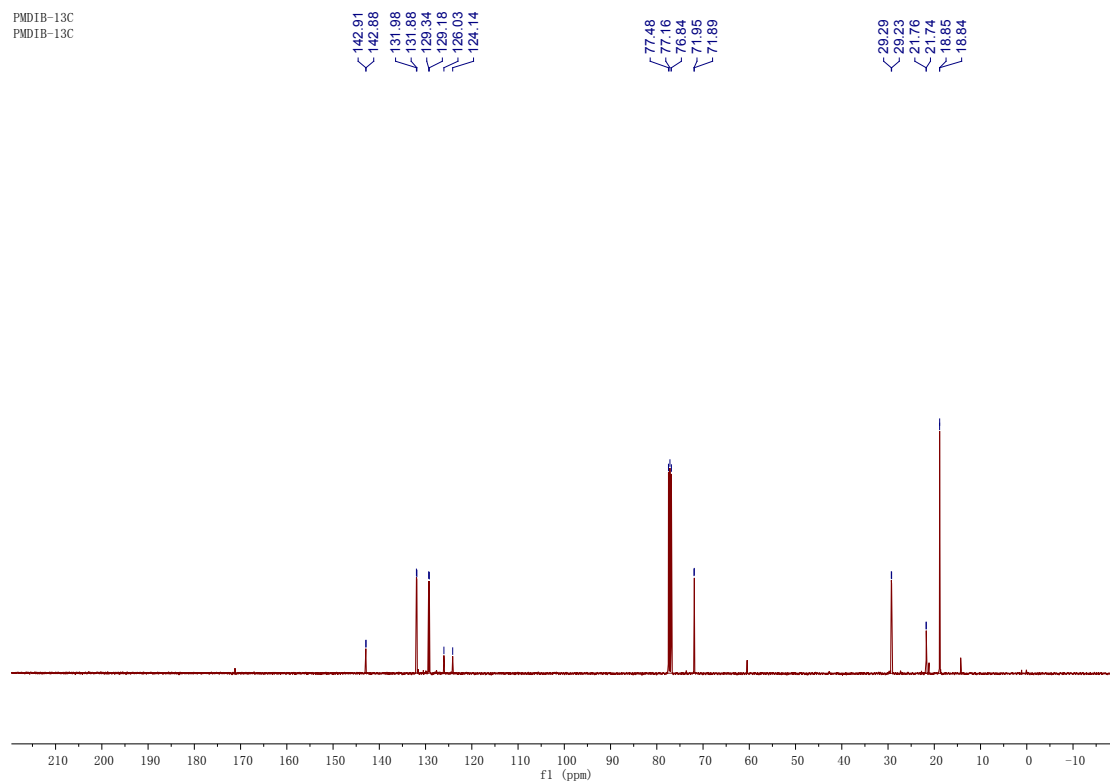

3f

PMD1B-31P  
PMD1B-31P

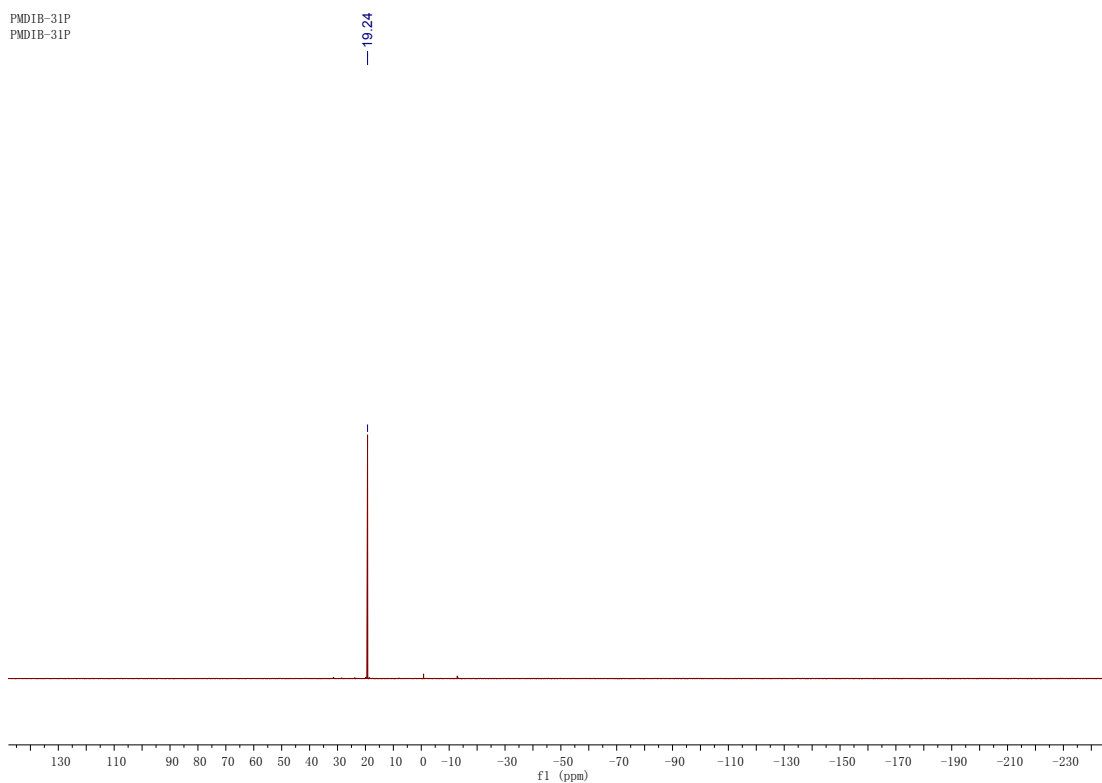

2013-11-27-4-Me-Ph-P(O)(OiBu)2\_131129174651#691 RT: 10.54 AV: 1 NL: 1.73E7  
T: + c Full ms [50.00-600.00]

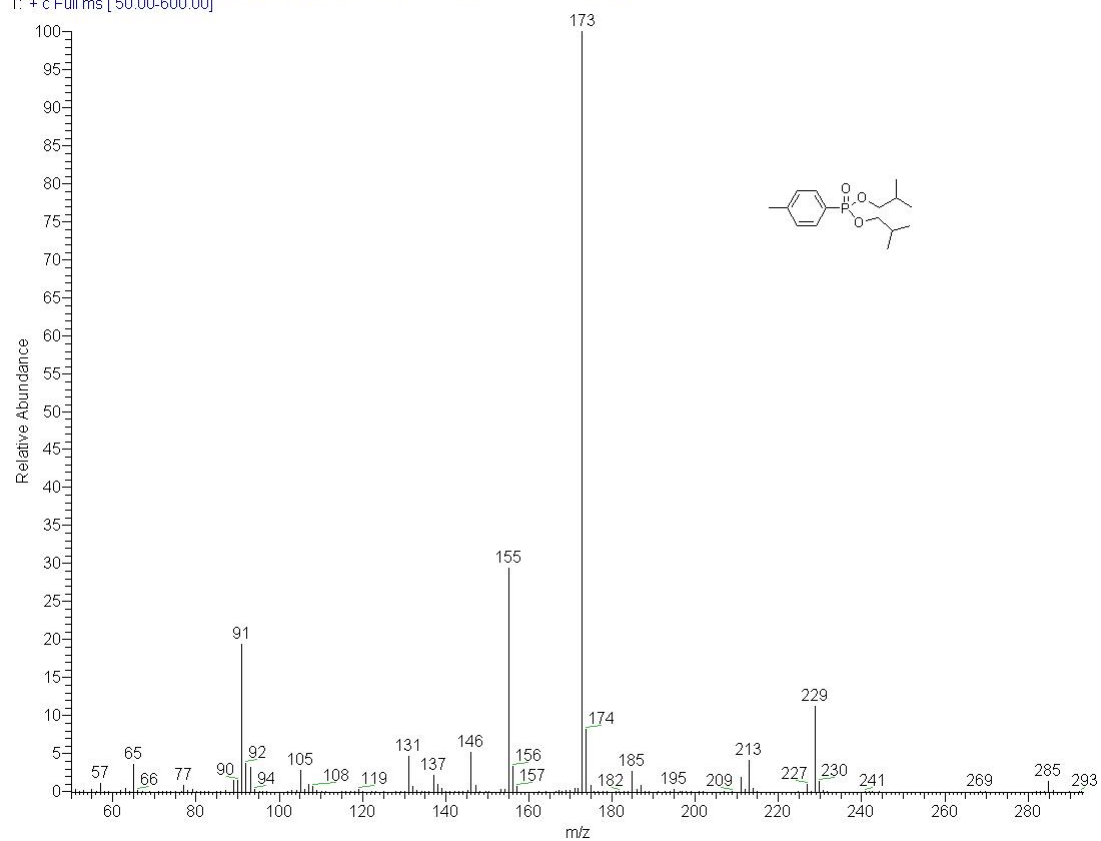

3h

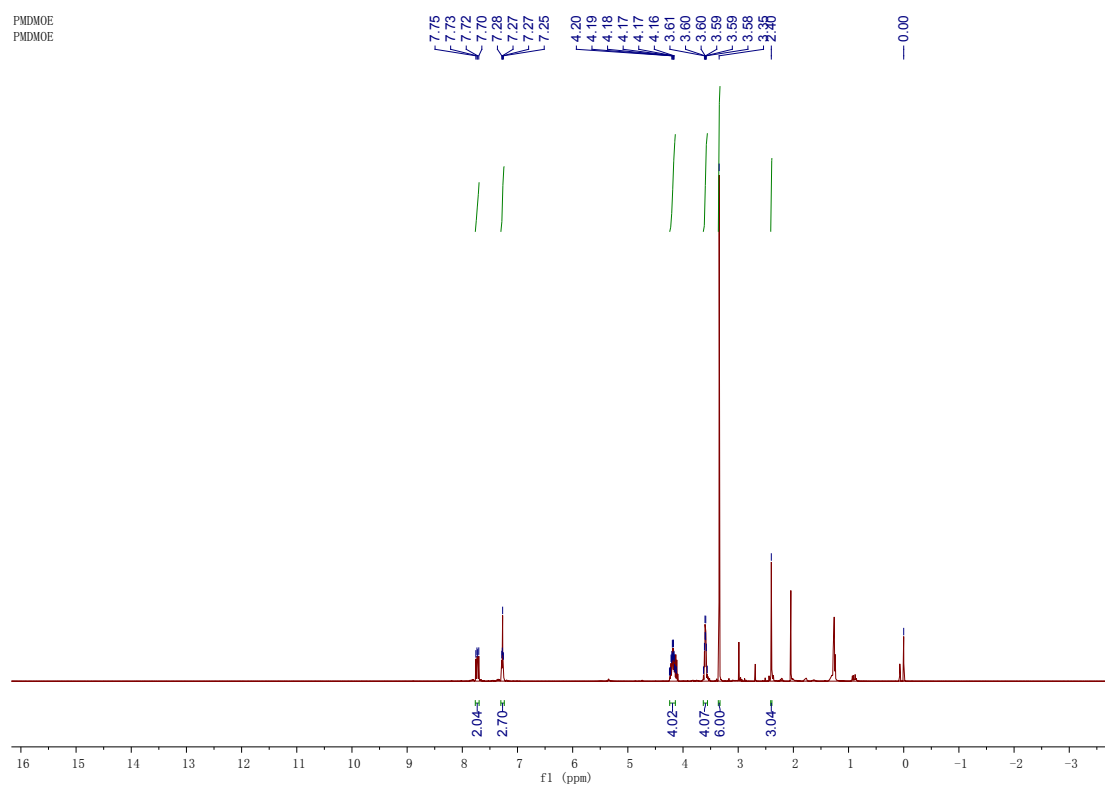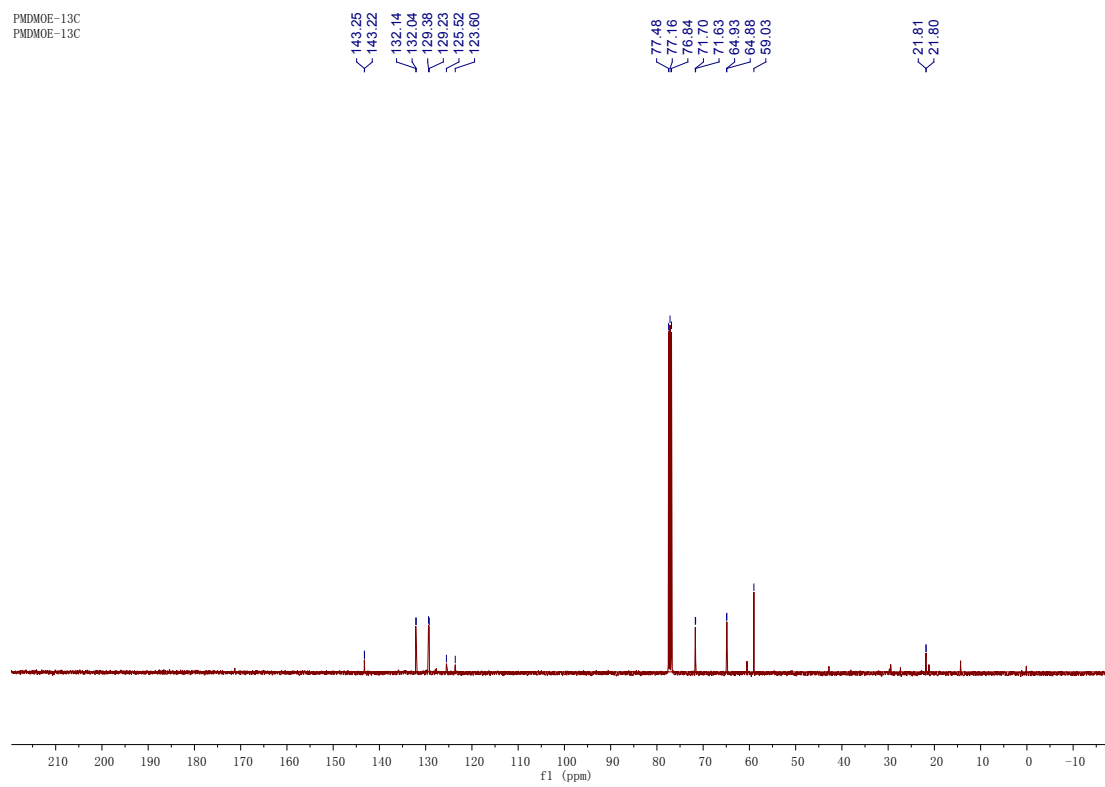

3h

PMDMOE-31P  
PMDMOE-31P

— 20.52

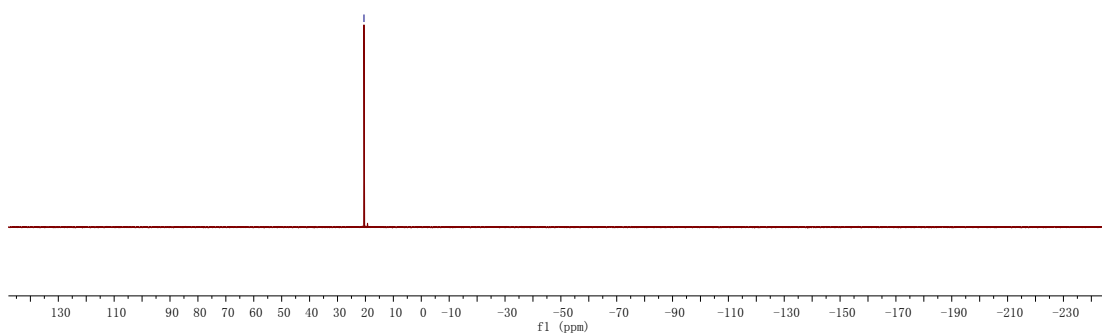

2013-11-22-4-Me-Ph-P(O)(OCH2CH2OMe)2-purified\_131127223907 #775 RT: 11.29 AV: 1 NL: 5.62E6  
T: + c Full ms [50.00-600.00]

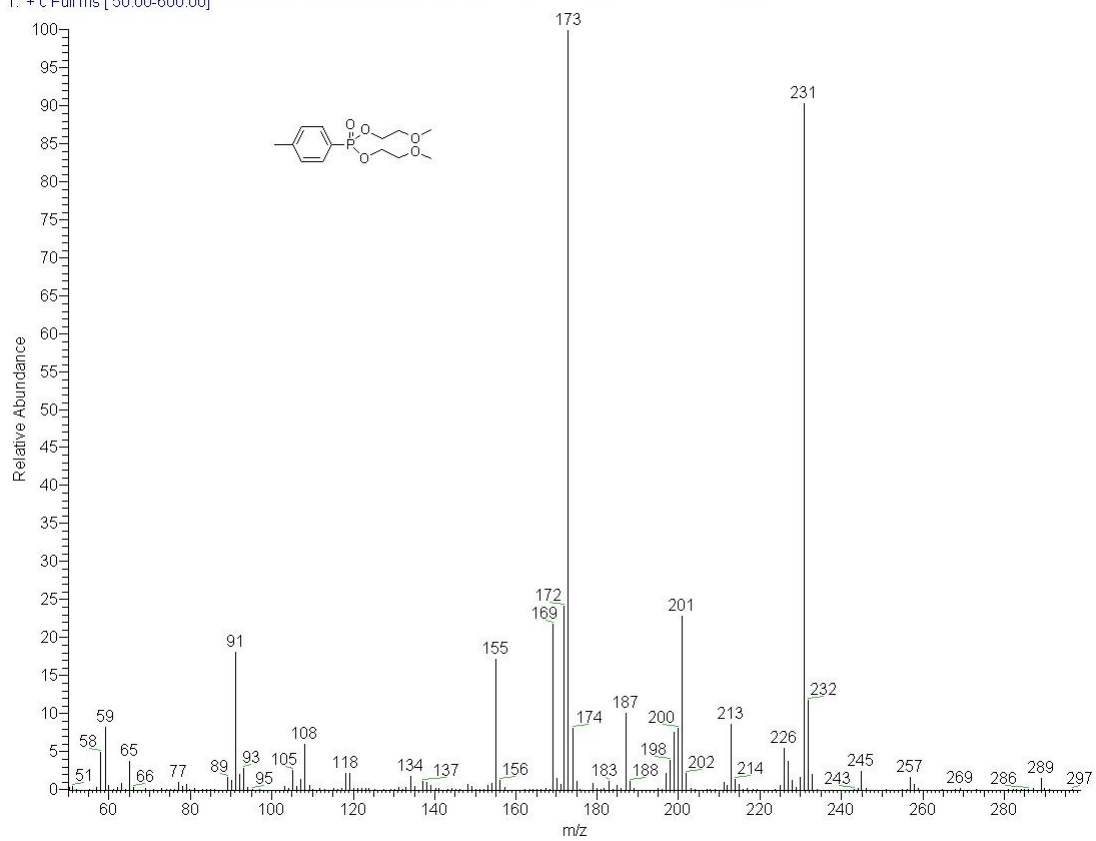

3i

DEPhenP  
DEPP

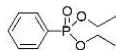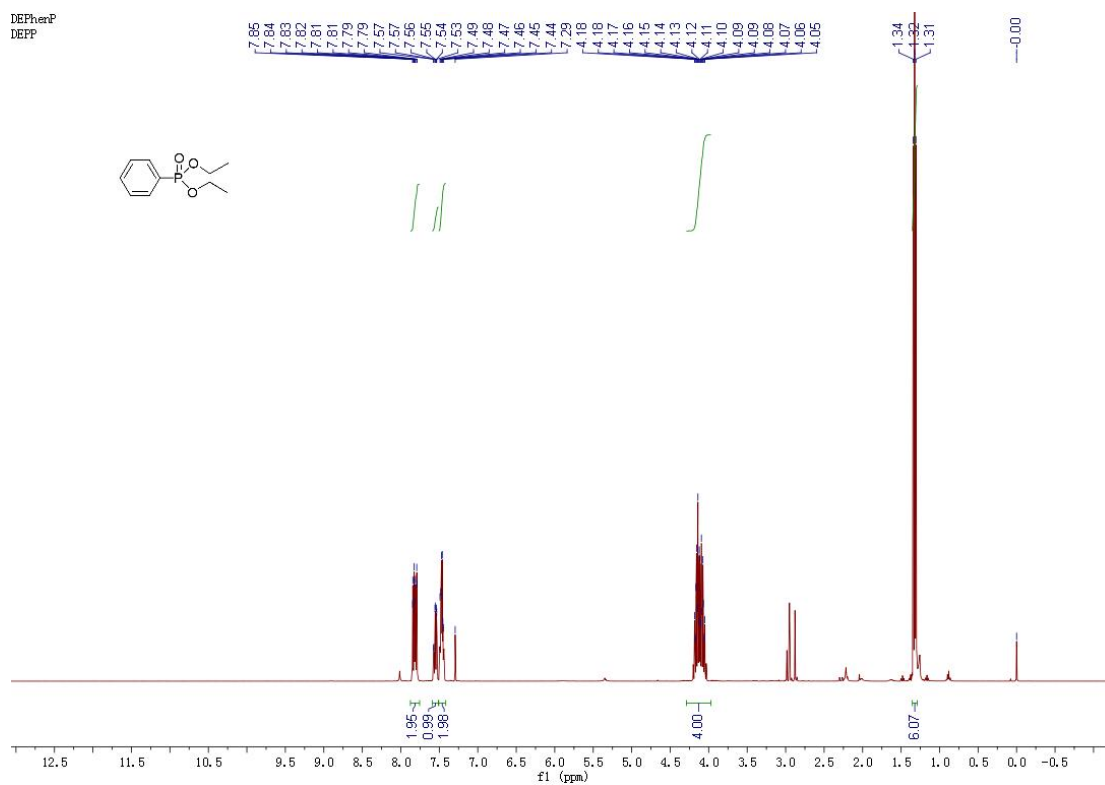

DEPhenP-13C  
DEPP-13C

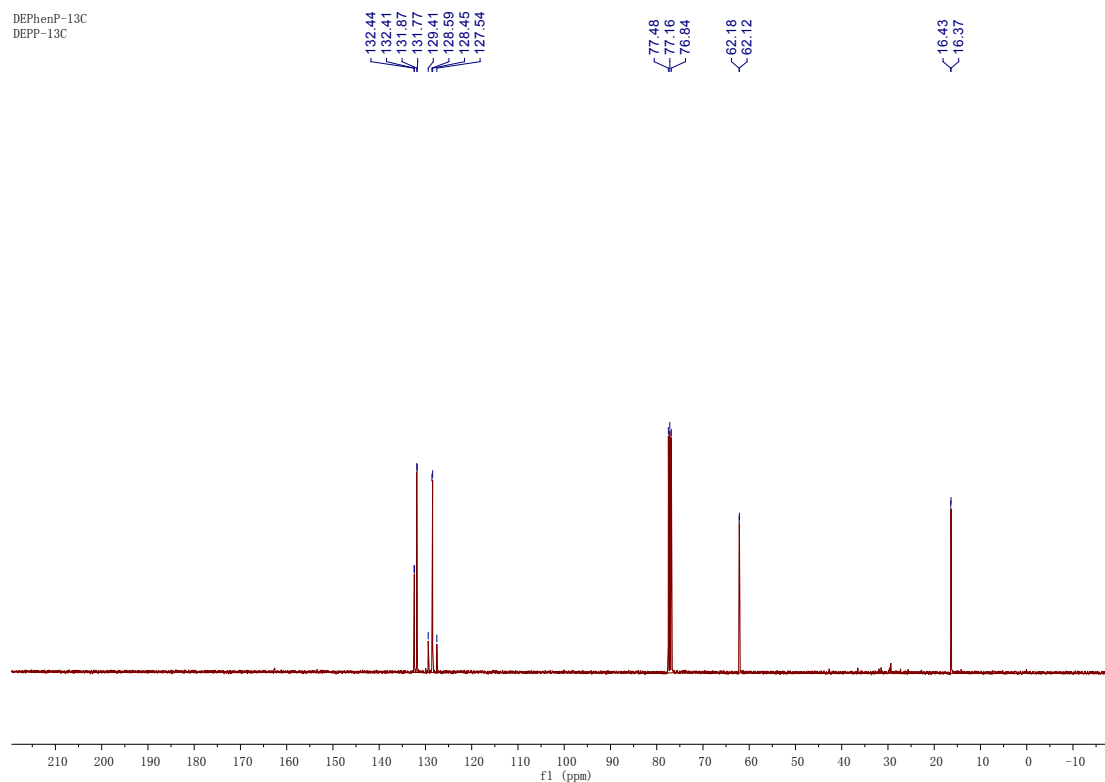



3i

DEPhenP-31P  
DEPP-31P

18.78

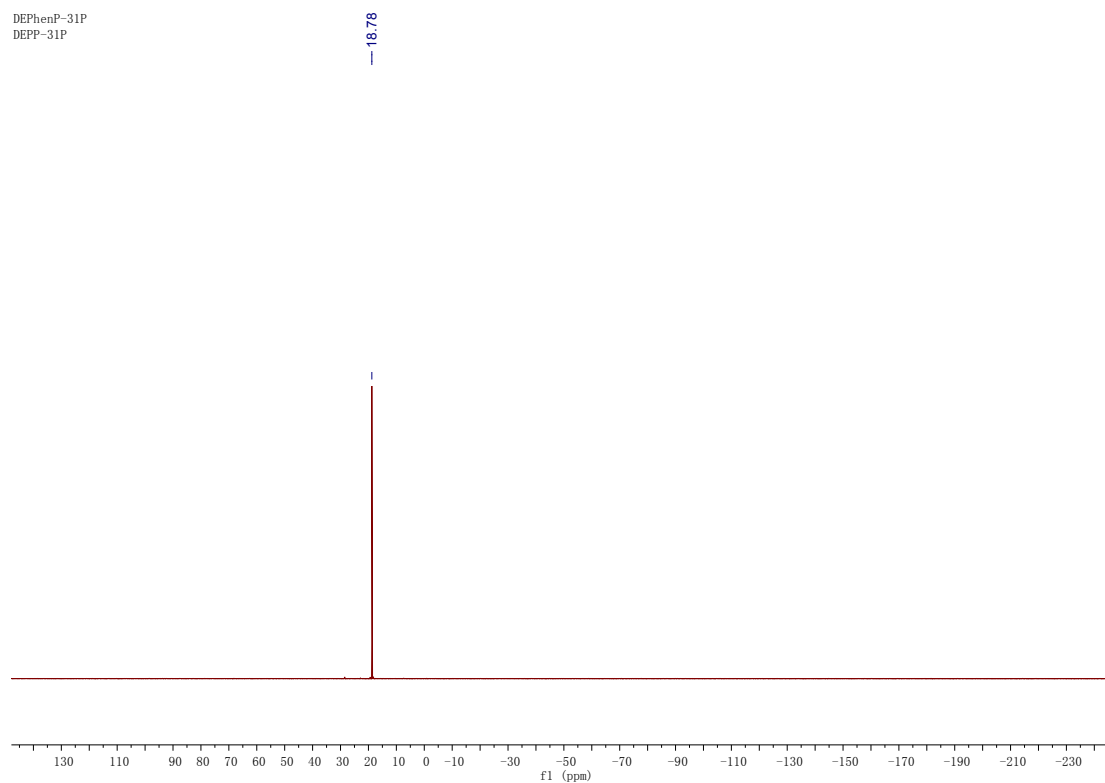

2013-12-09-Ph-P(O)(OEt)2 #473 RT: 8.42 AV: 1 NL: 6.62E5  
T: + c Full ms [50.00-600.00]

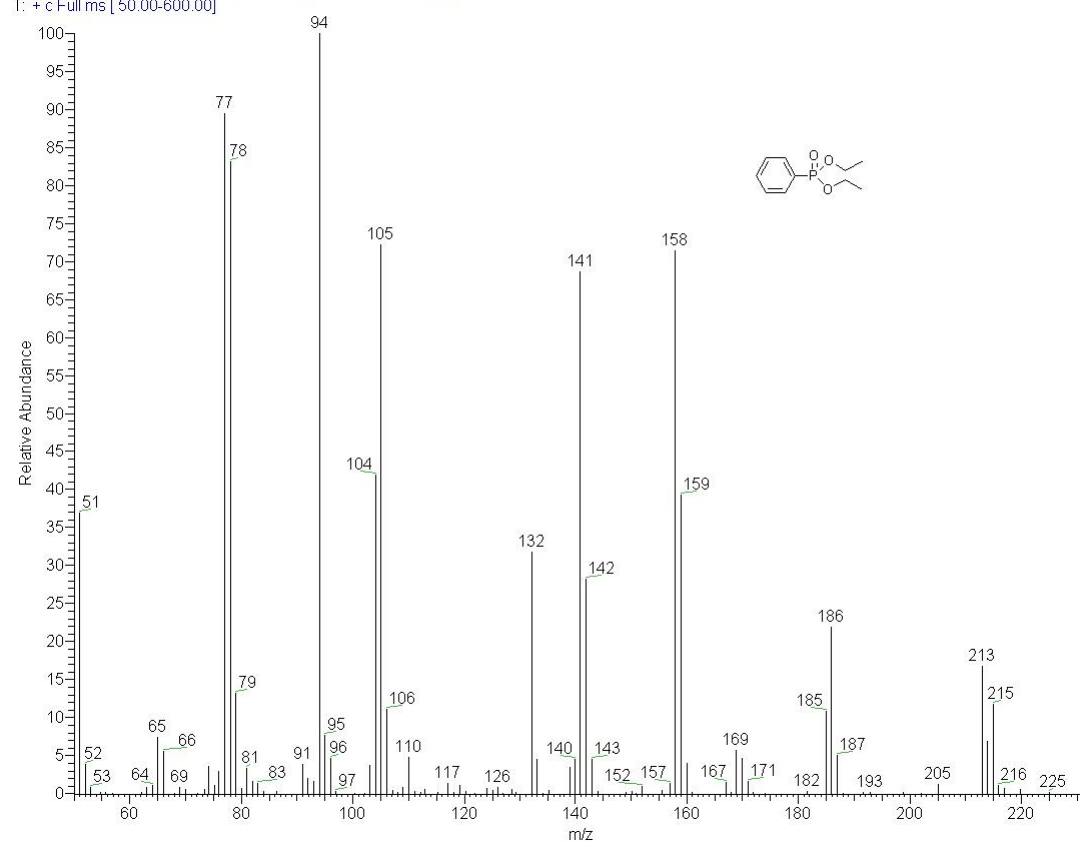

3j

DEMTP  
DEMTP

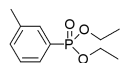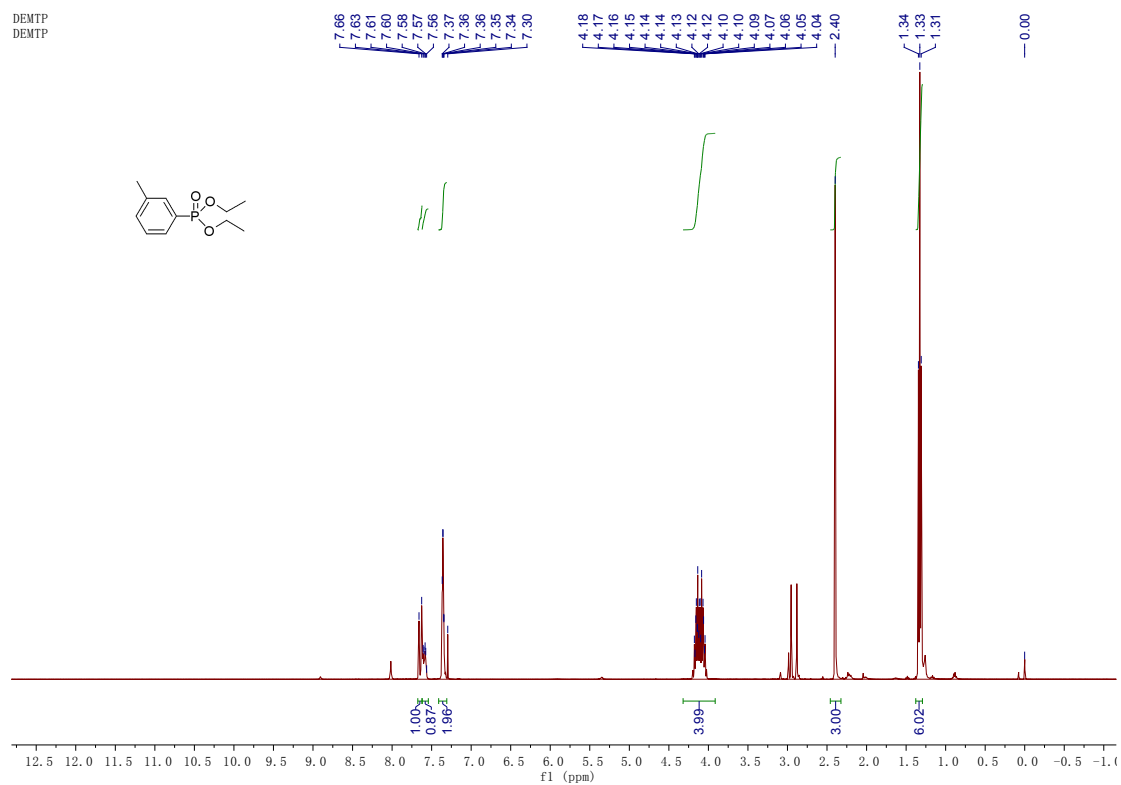

DEMTP-13C  
DEMTP-13C

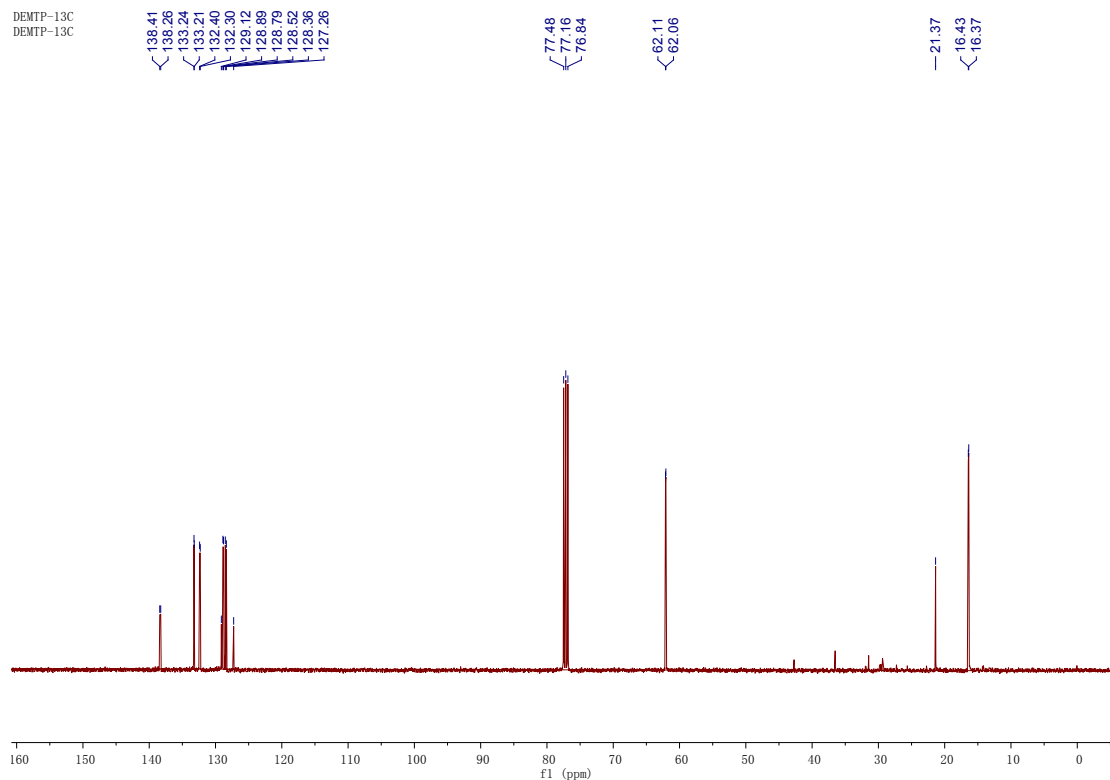

3j

DEMTP-31P  
DEMTP-31P

— 19.28

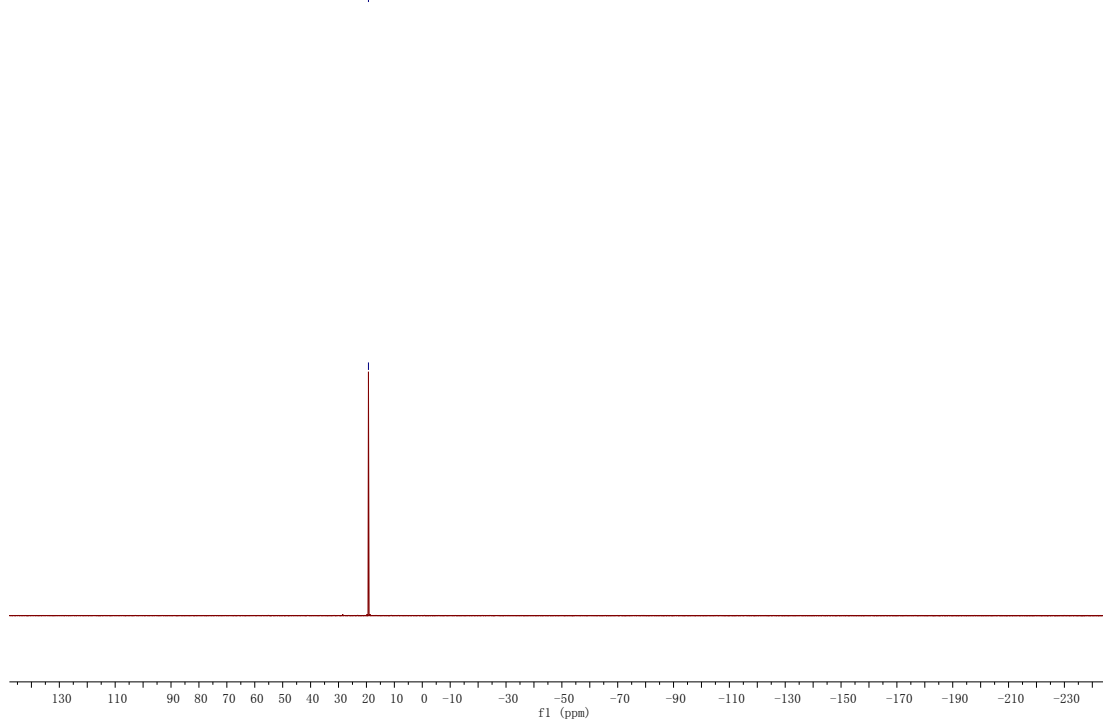

2013-12-10-3-Me-Ph-P(O)(OEt)2 #532 RT: 9.01 AV: 1 NL: 8.36E6  
T: + c Full ms [50.00-600.00]

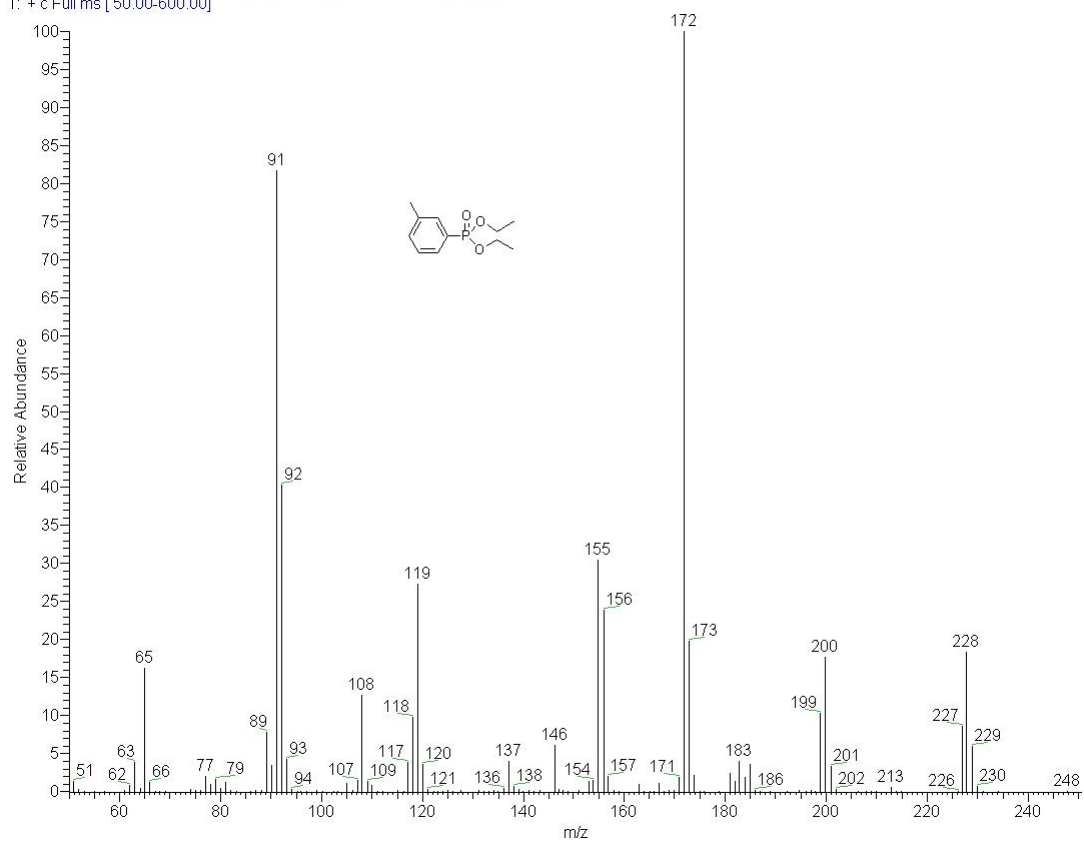

3k

DEOTP  
DEOTP

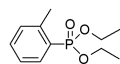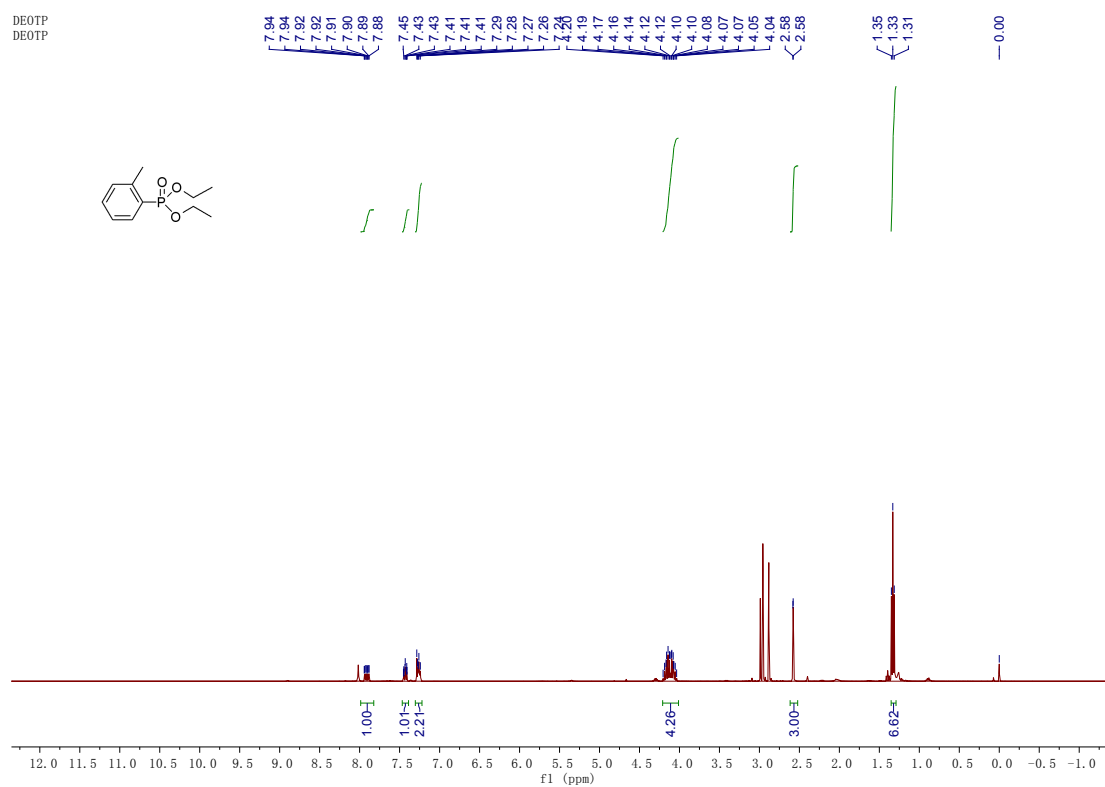

DEOTP-13C  
DEOTP-13C

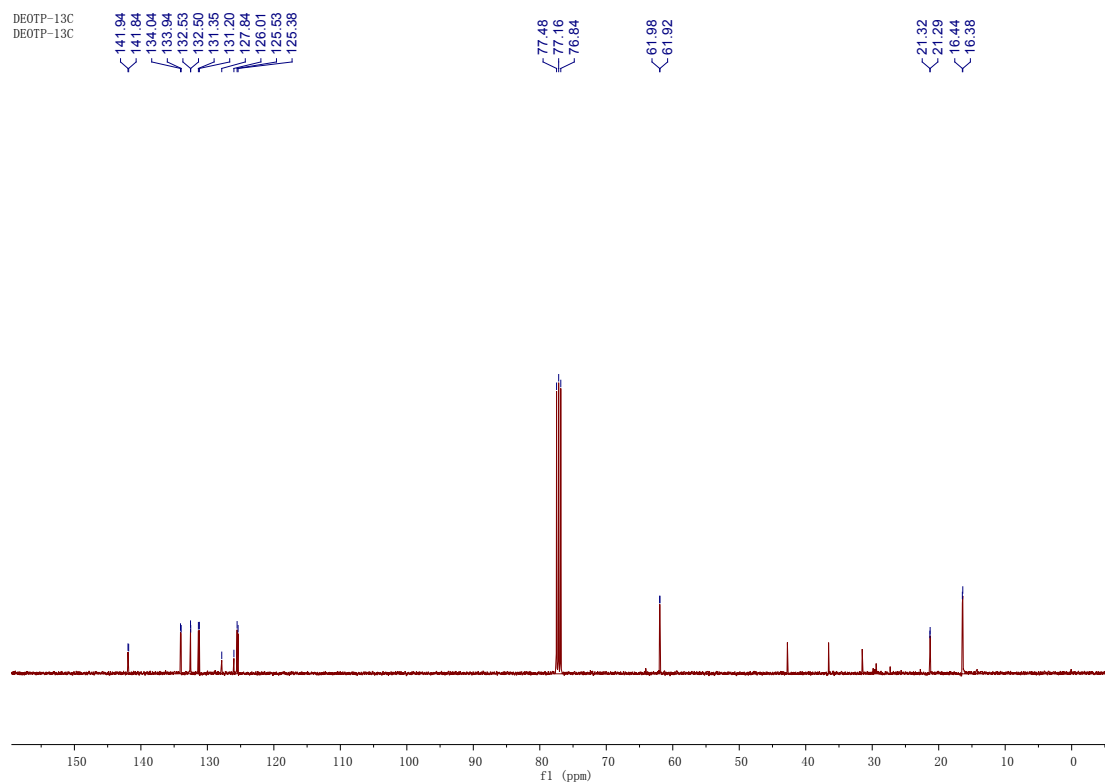

3k

DEOTP-31P  
DEOTP-31P

19.44

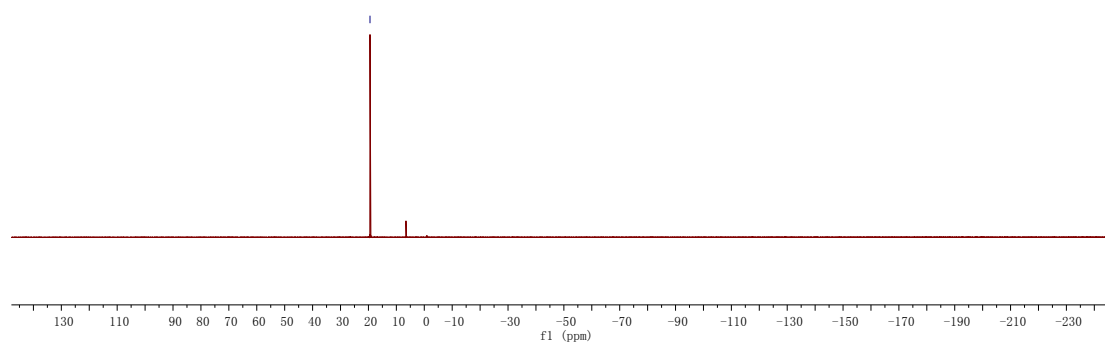

2013-12-10-2-Me-Ph-P(O)(OEt)2 #513 RT: 8.81 AV: 1 NL: 1.85E5  
T: + c Full ms [50.00-600.00]

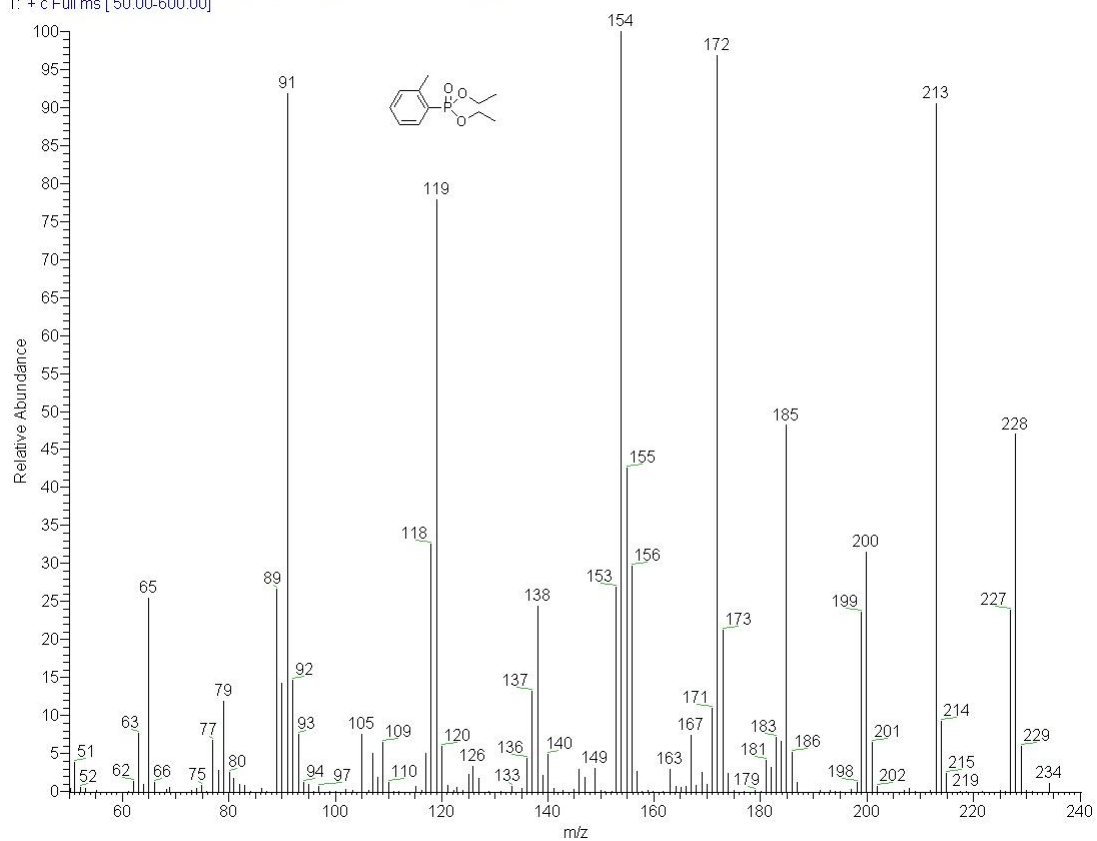

31

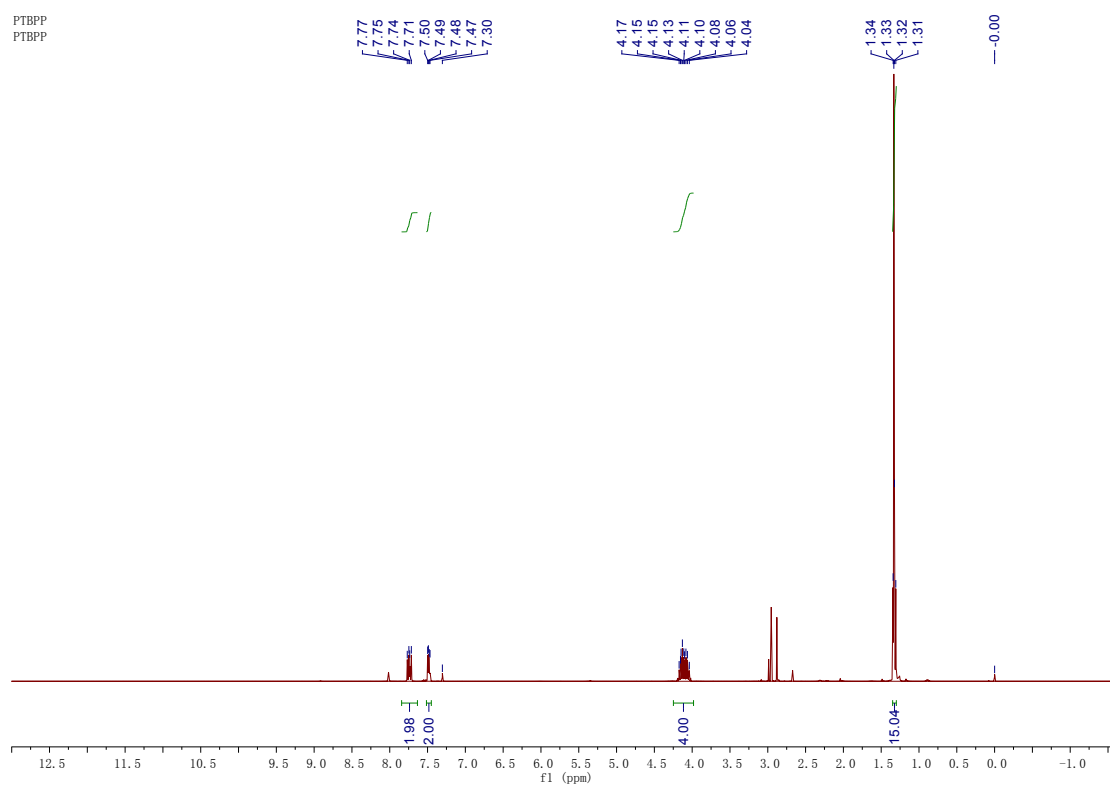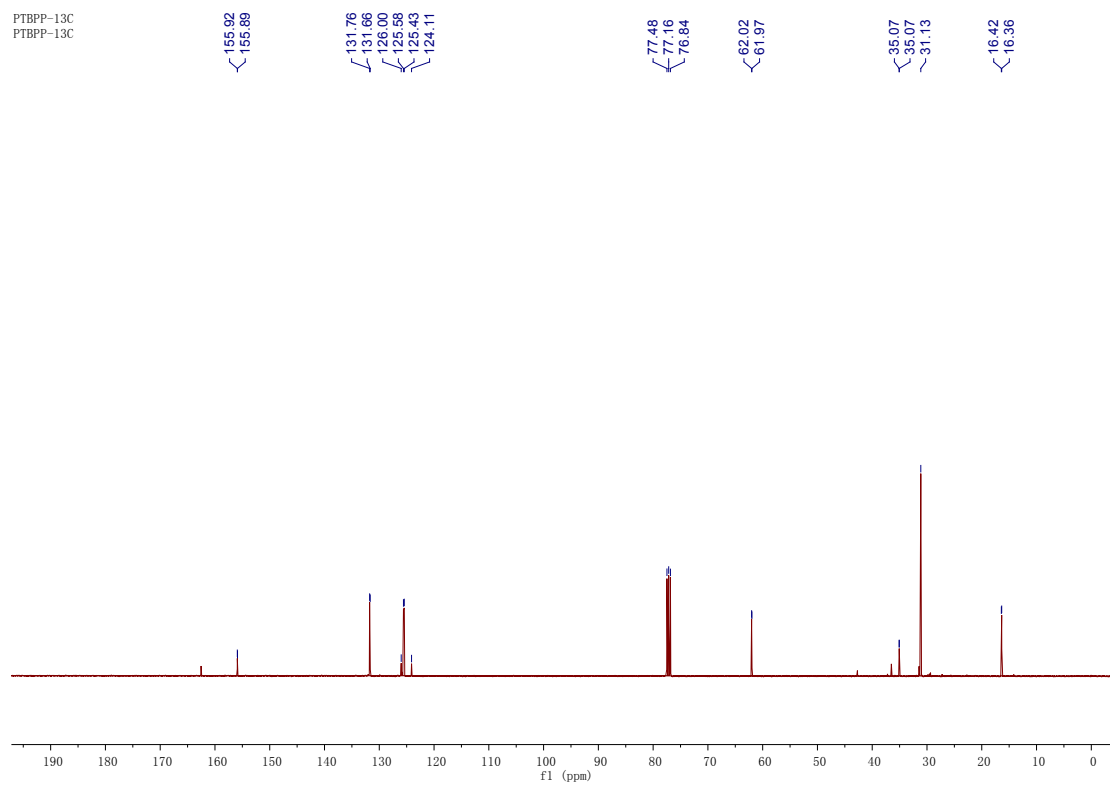

31

PTBPP-31P  
PTBPP-31P

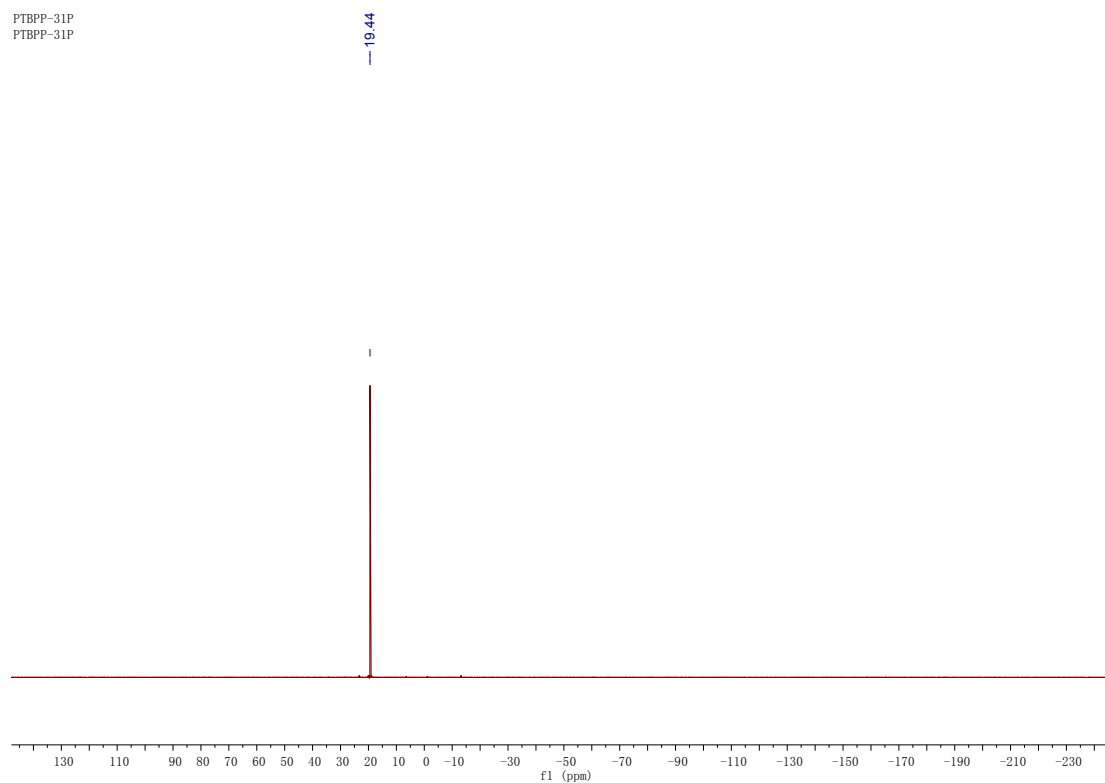

2013-12-08-4-tBu-Ph-P(O)(OEt)2 #675 RT: 10.34 AV: 1 NL: 2.14E7  
T: + c Full ms [50.00-600.00]

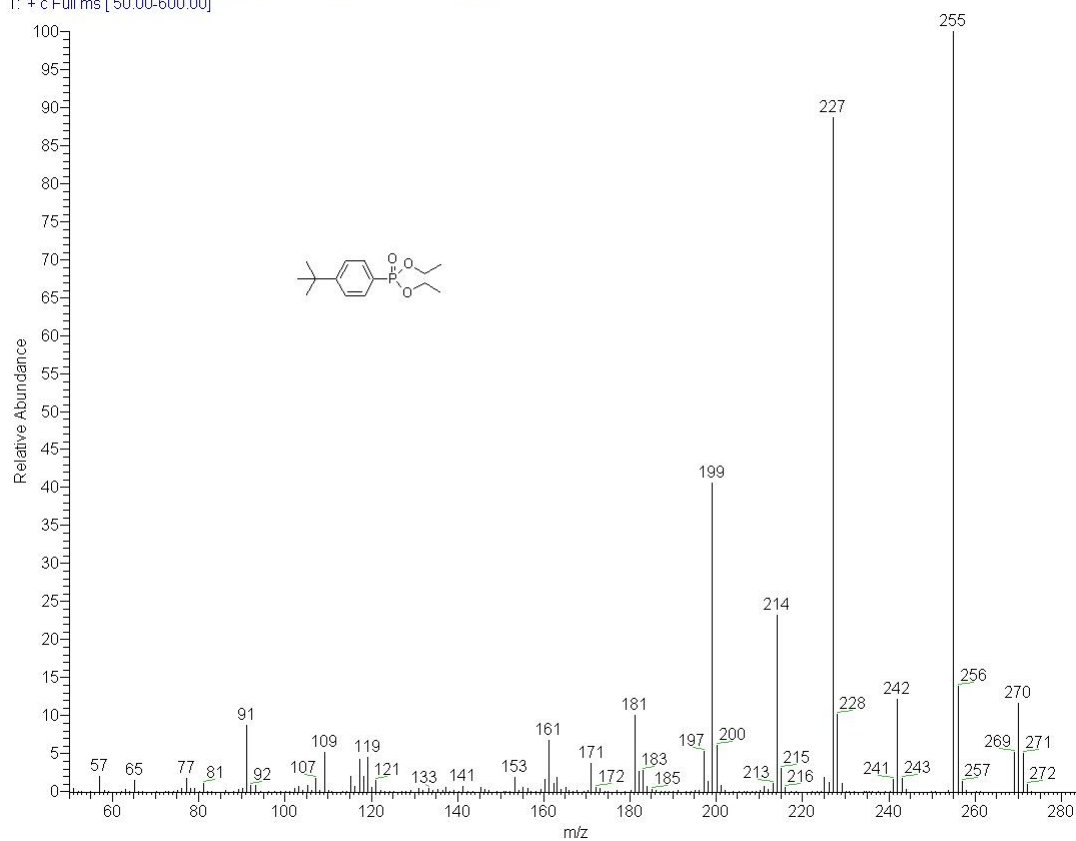

### 3m

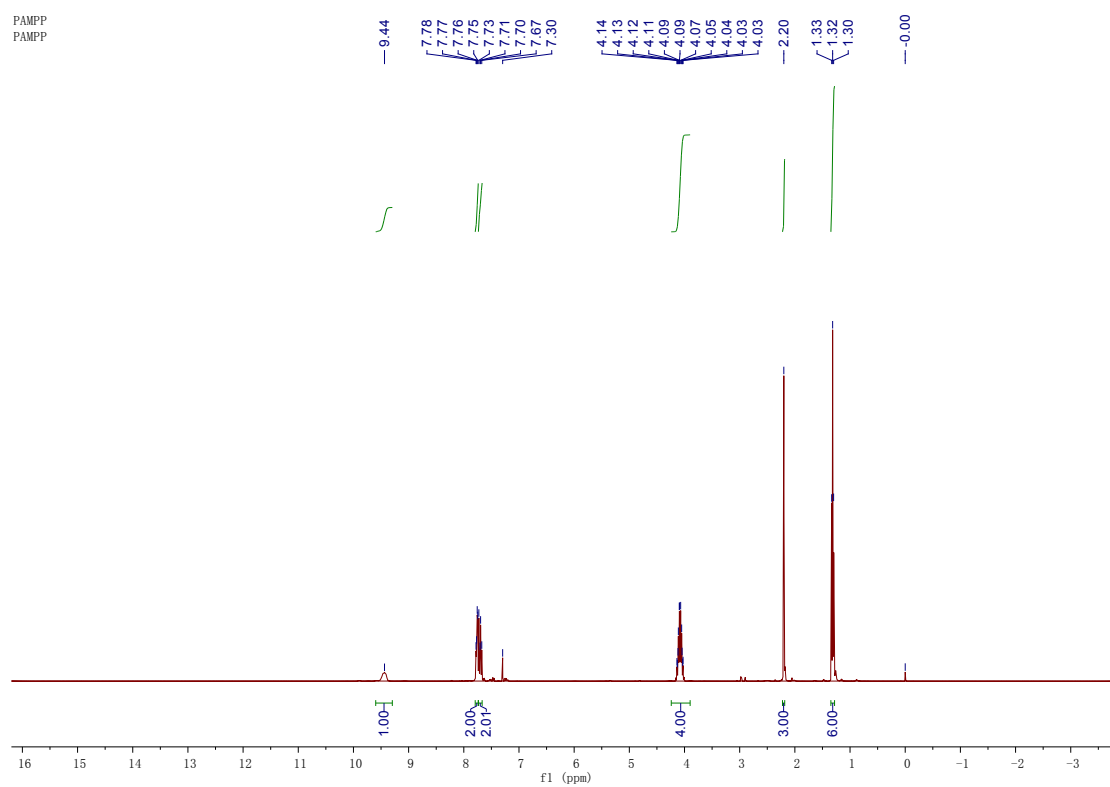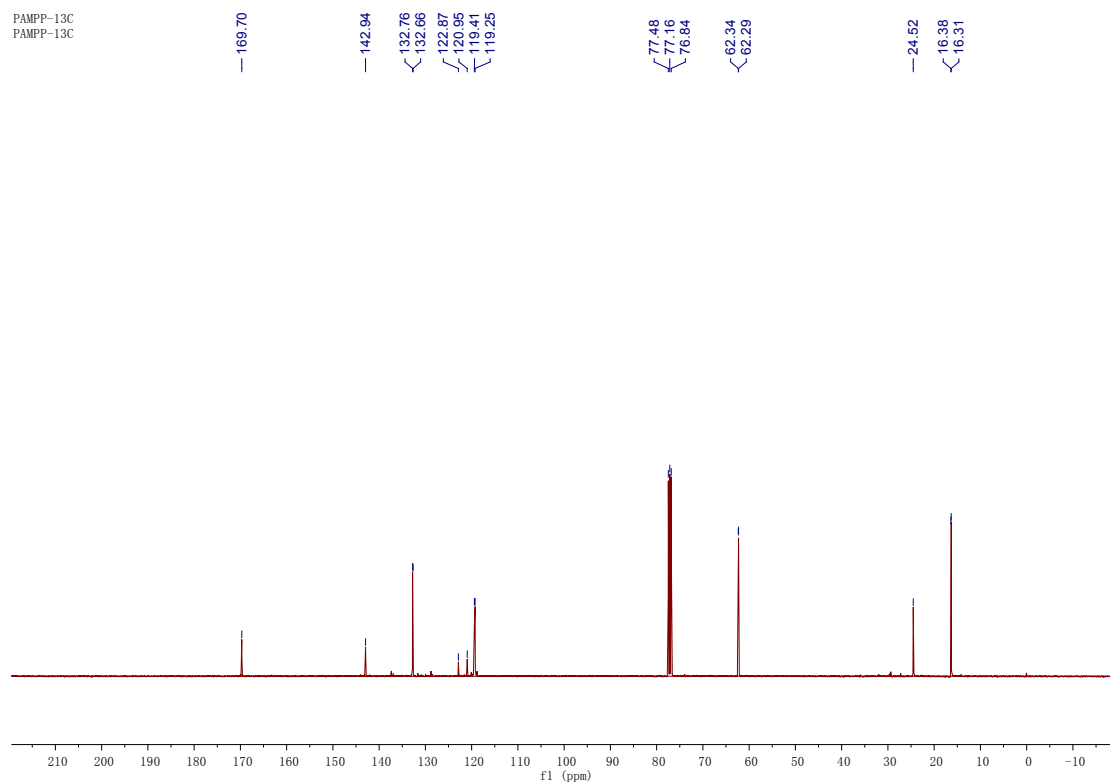



### 3m

PAMPP-31P  
PAMPP-31P

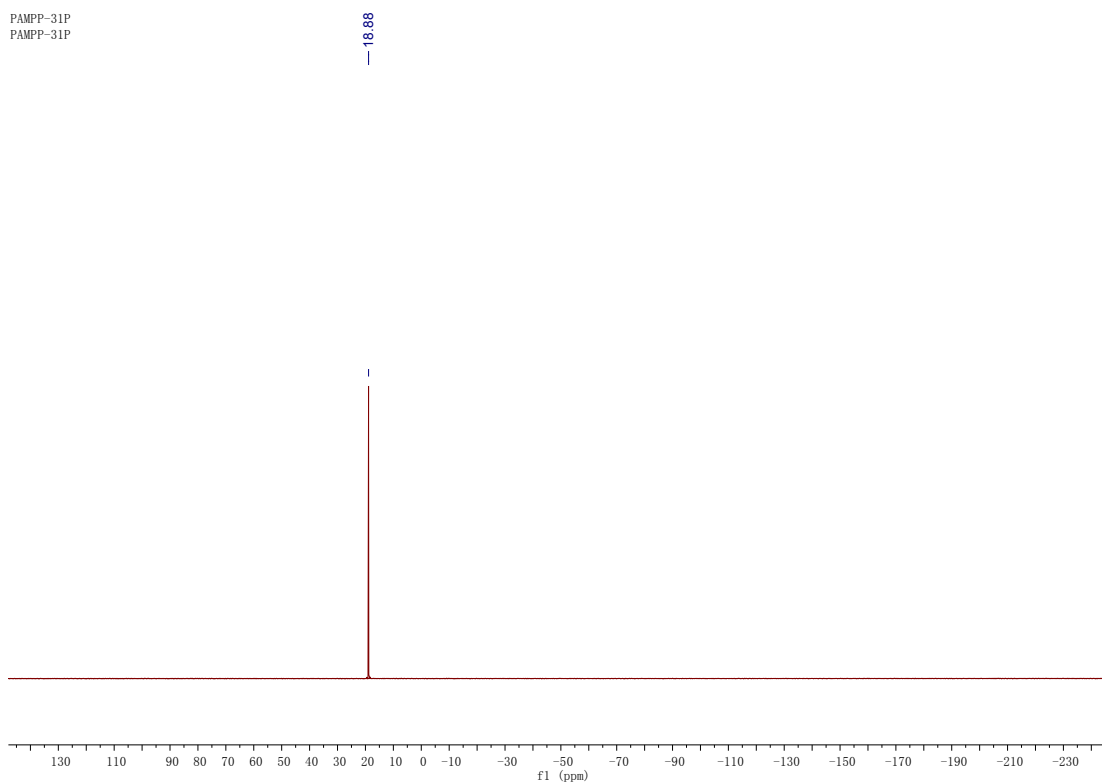

2013-12-06-4-AcNH-Ph-P(O)(OEt)2-after-EA-CHCl3 #891 RT: 12.42 AV: 1 NL: 1.10E6  
T: + c Full ms [50.00-600.00]

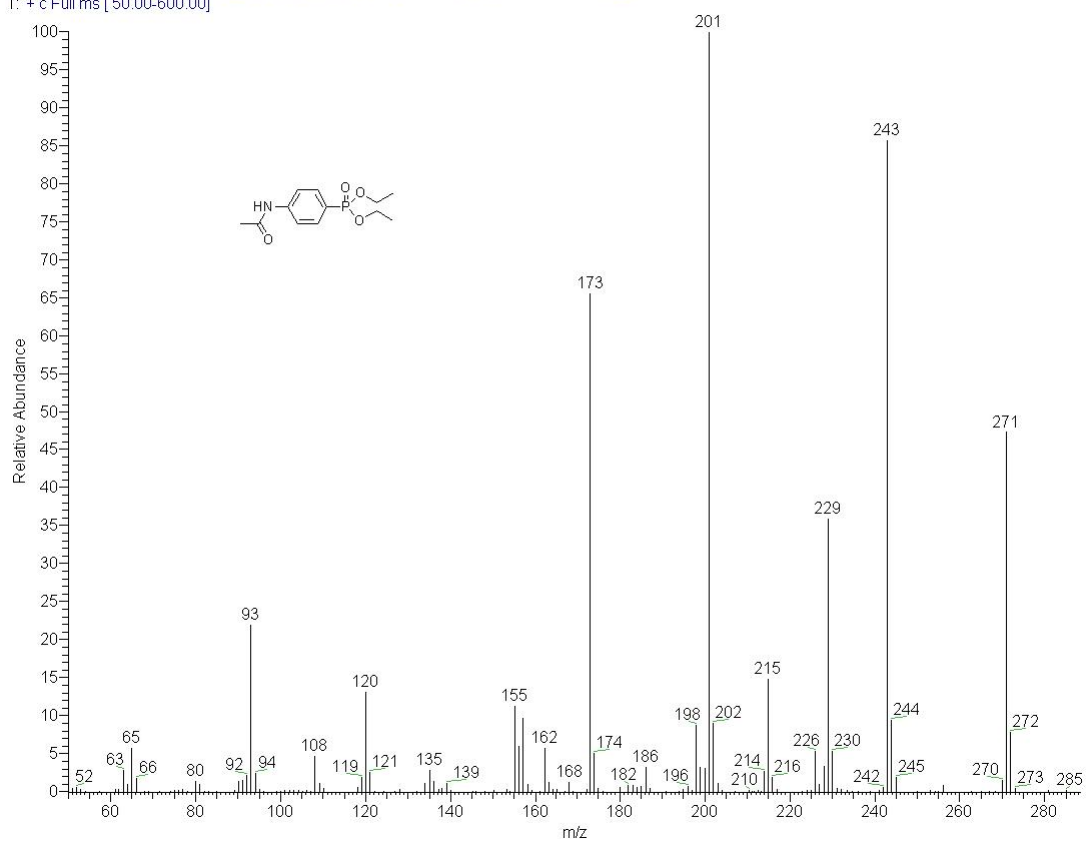

### 3n

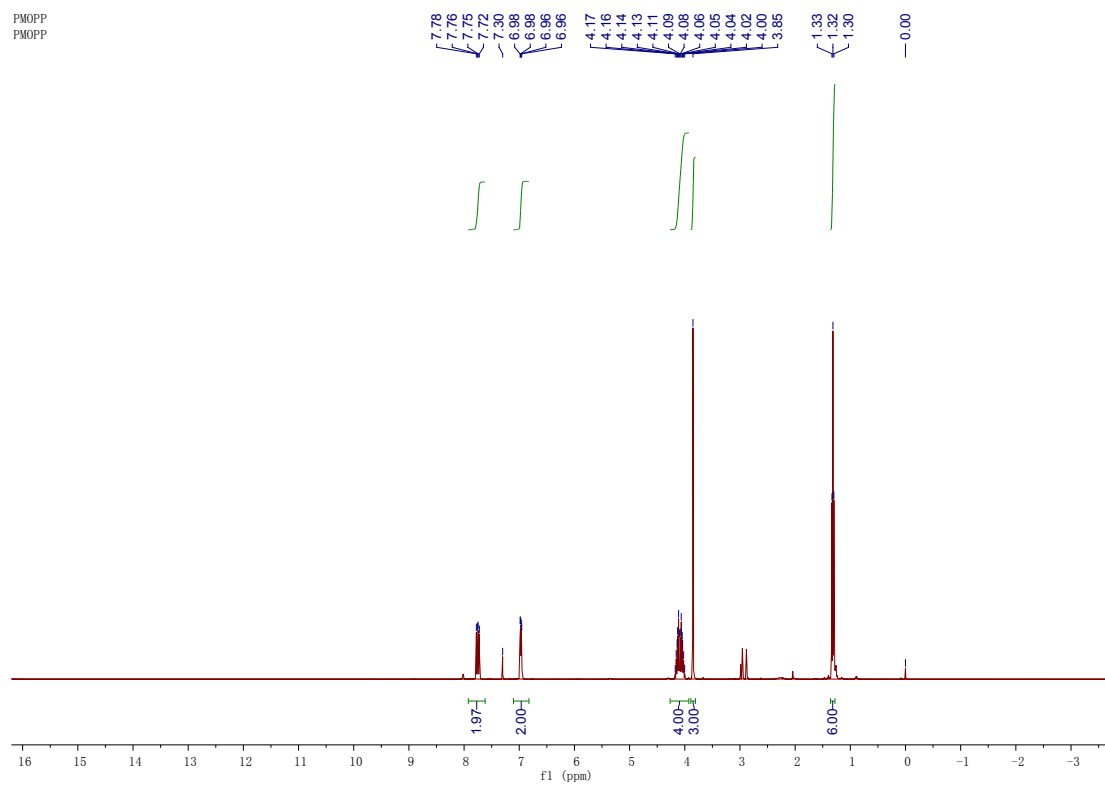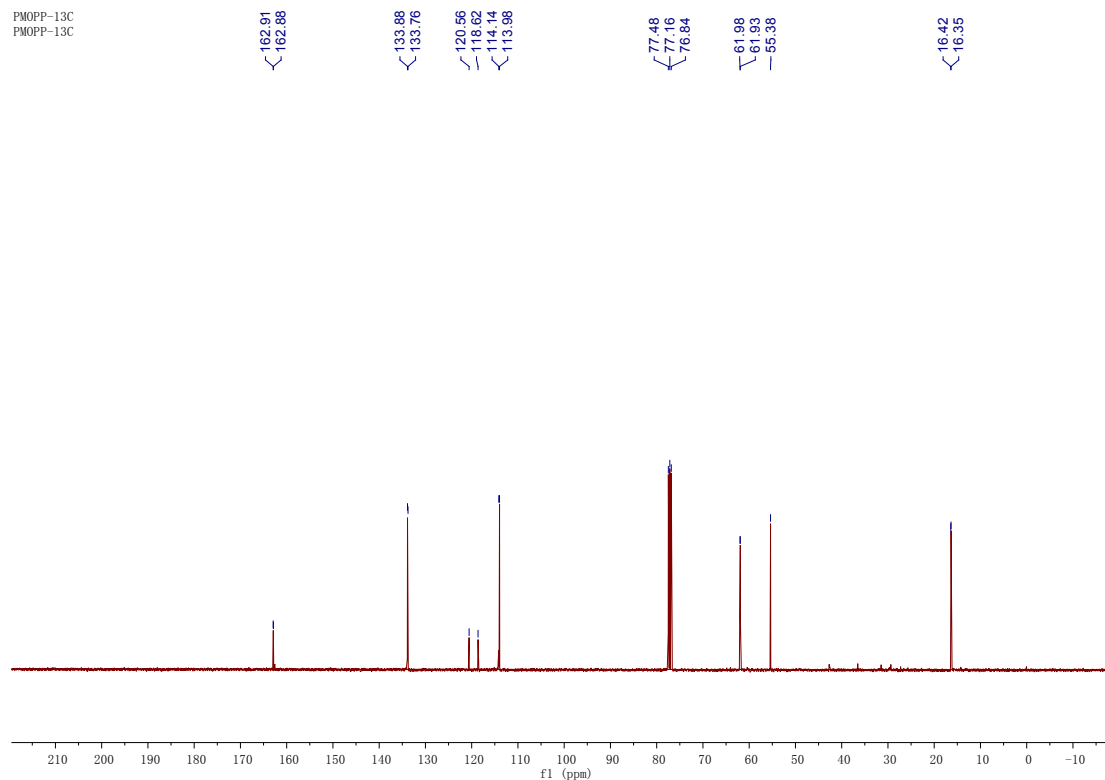

### 3n

PMOPP-31P  
PMOPP-31P

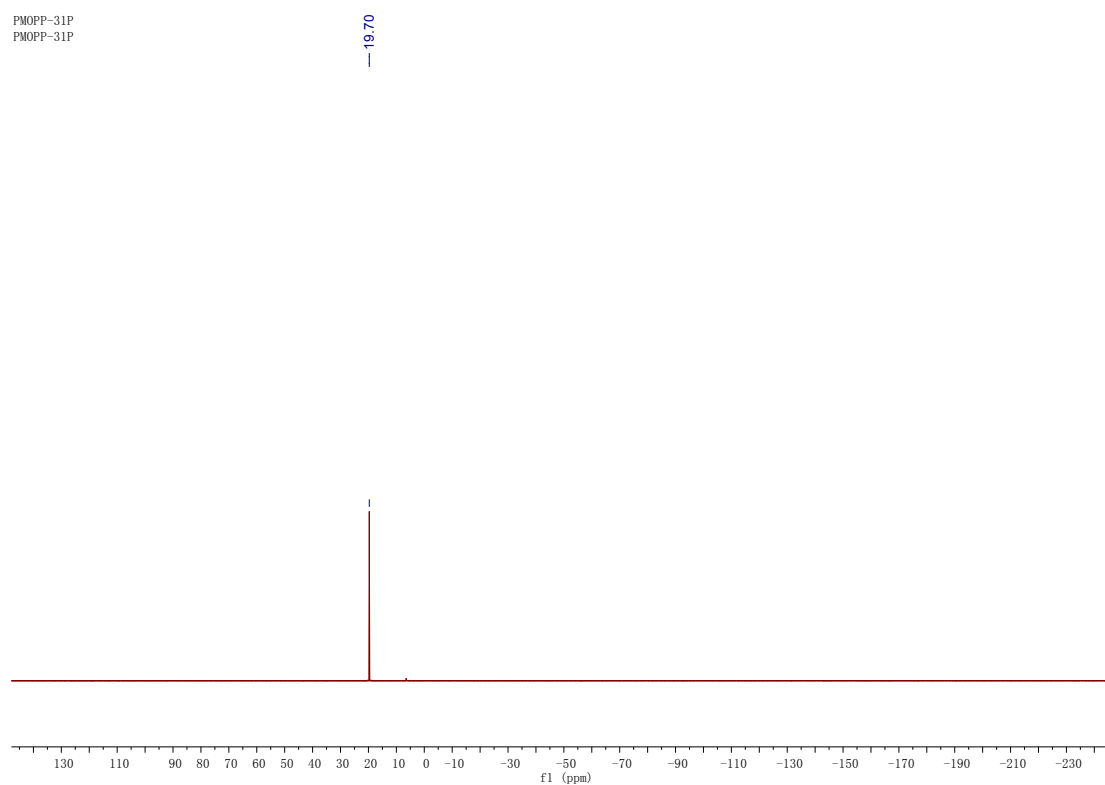

2013-12-06-4-MeO-Ph-P(O)(OEt)2 #633 RT: 10.02 AV: 1 NL: 9.19E6  
T: + c Full ms [50.00-600.00]

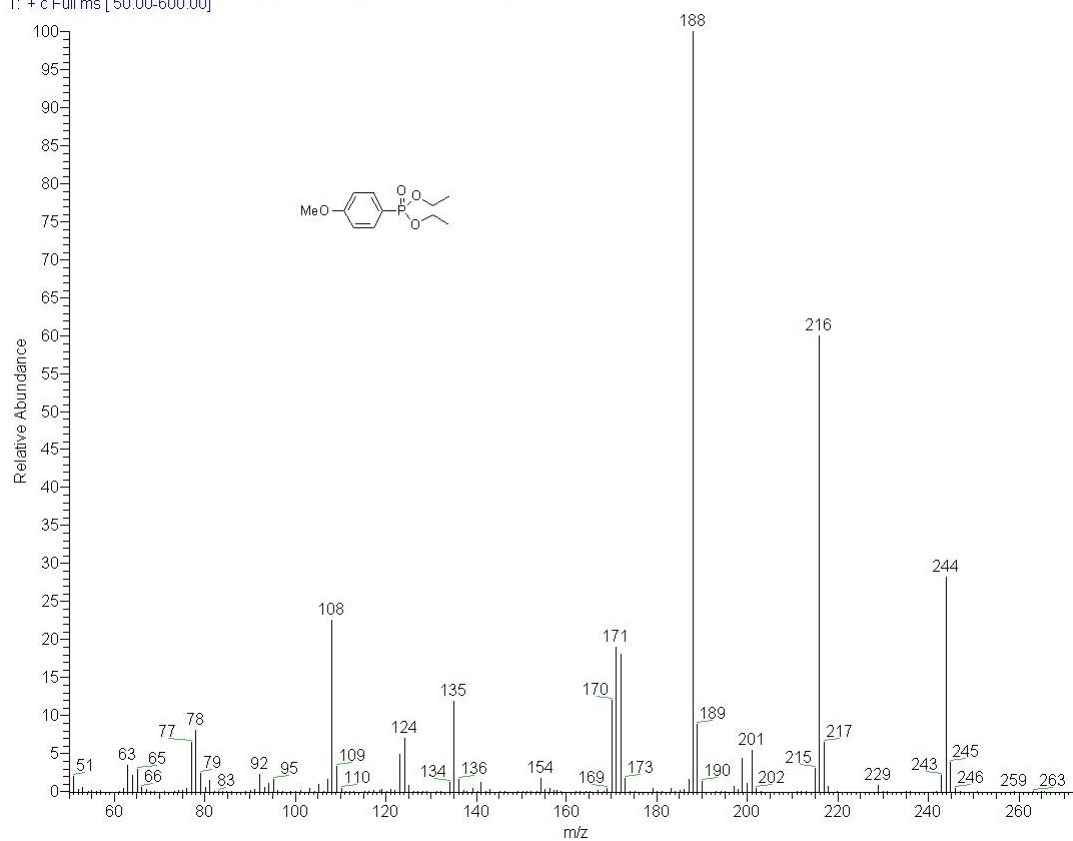

30

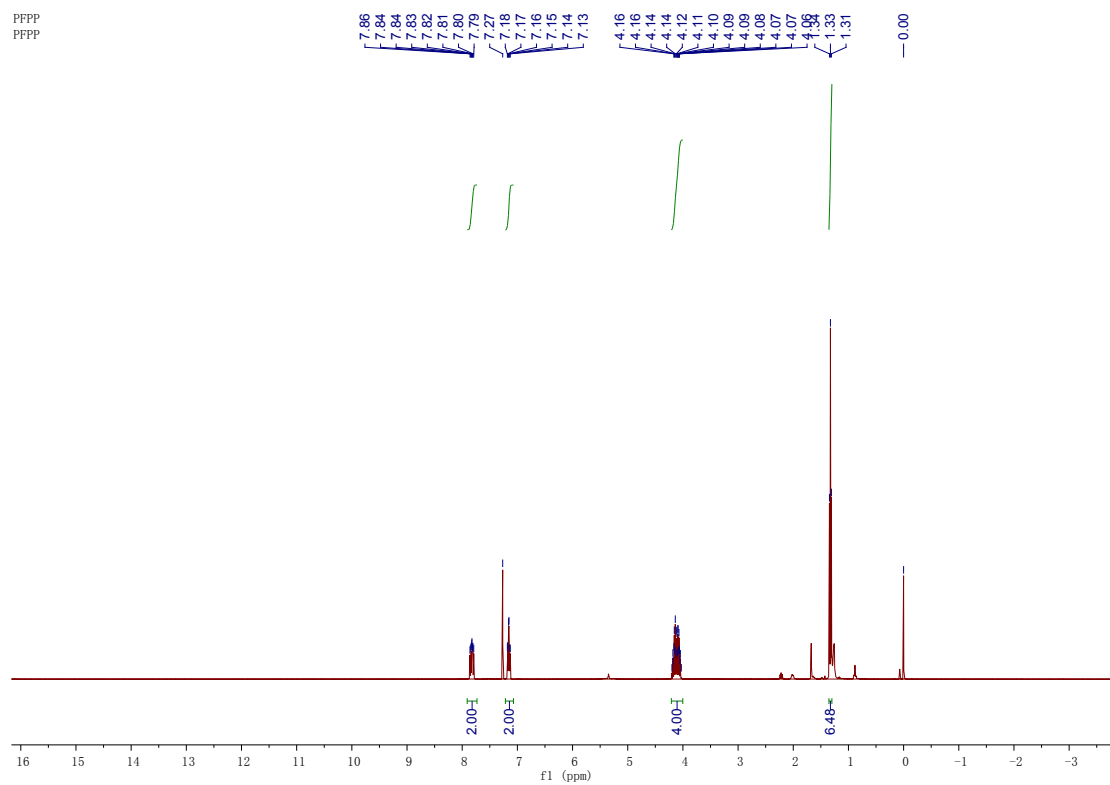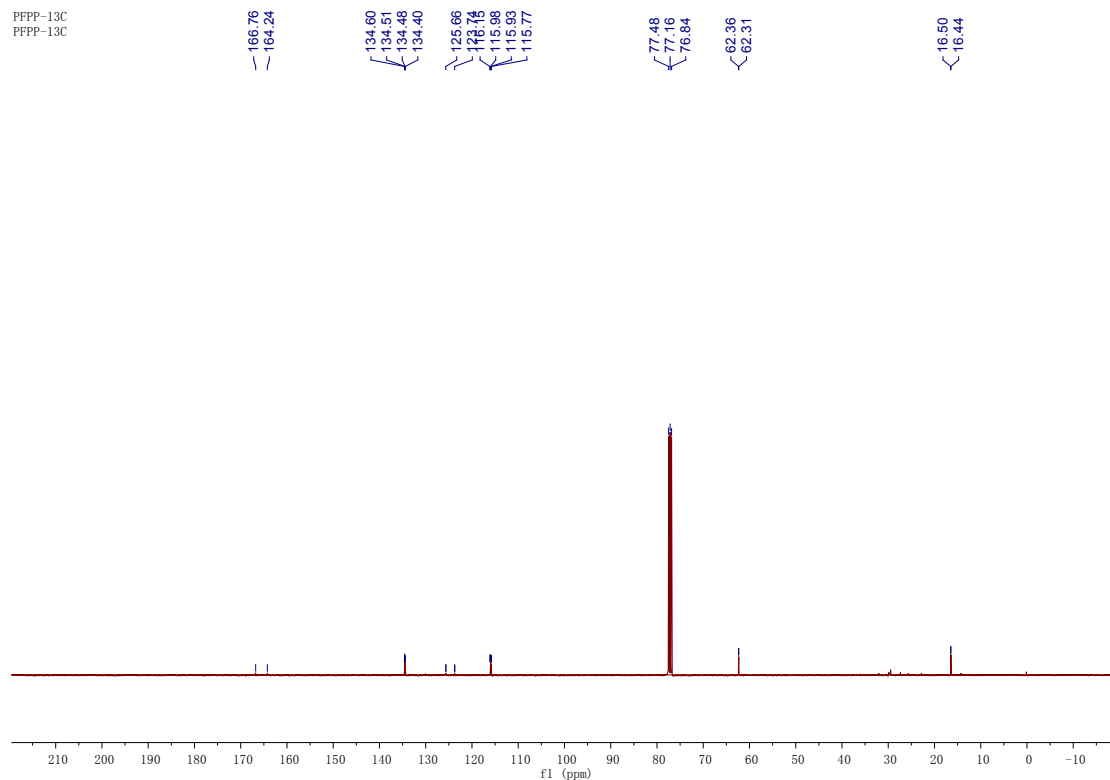

3o

PFPF-31P  
PFPF-31P

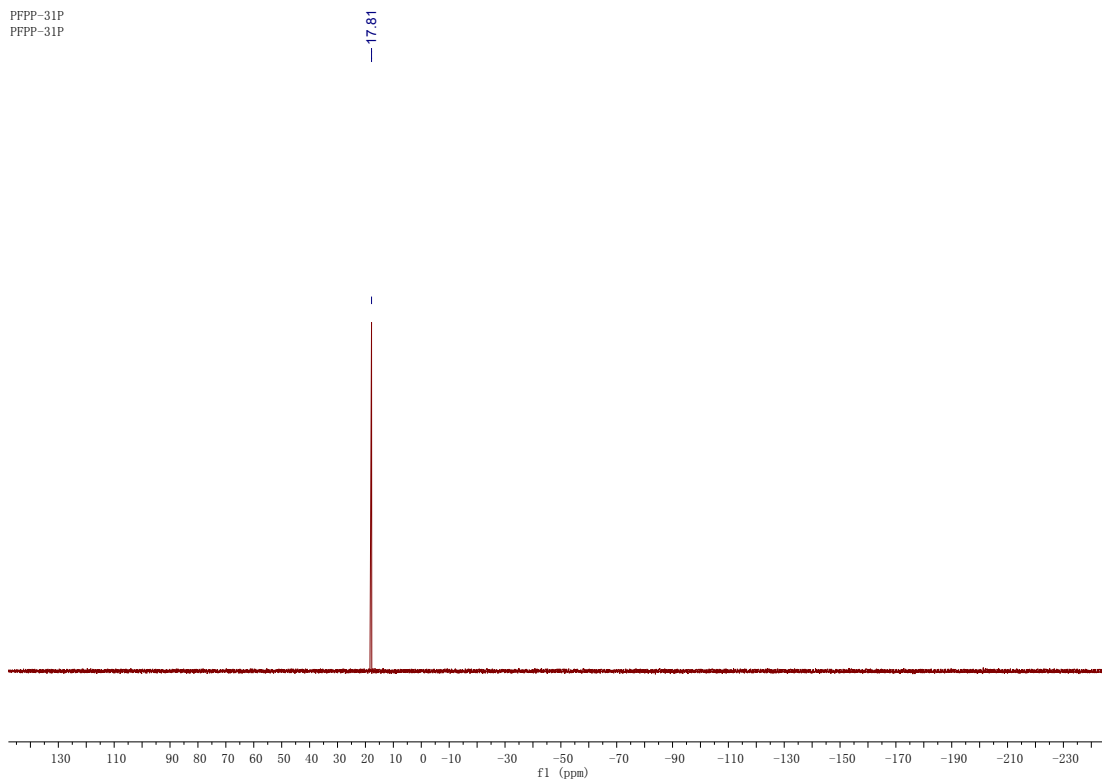

2013-12-04-4-F-Ph-P(O)(OEt)2-2\_131204164330 #445 RT: 8.17 AV: 1 NL: 5.14E5  
T: + c Full ms [50.00-600.00]

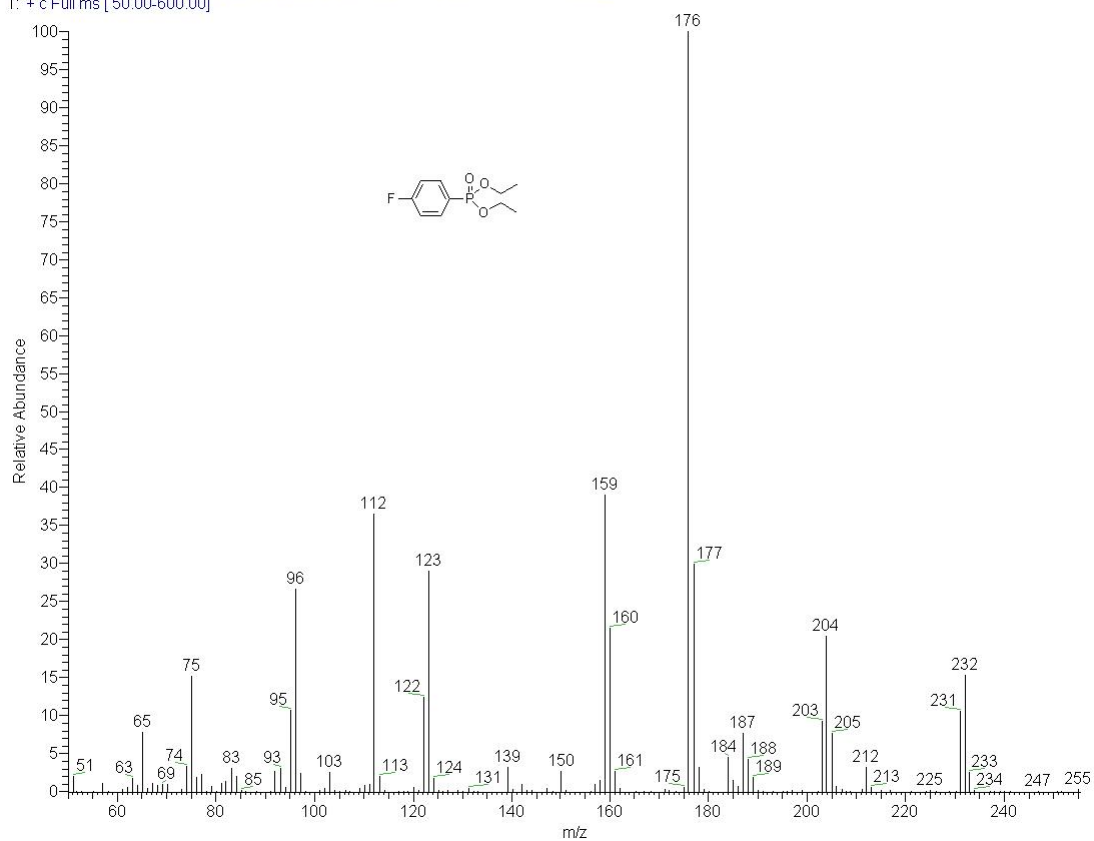

3p

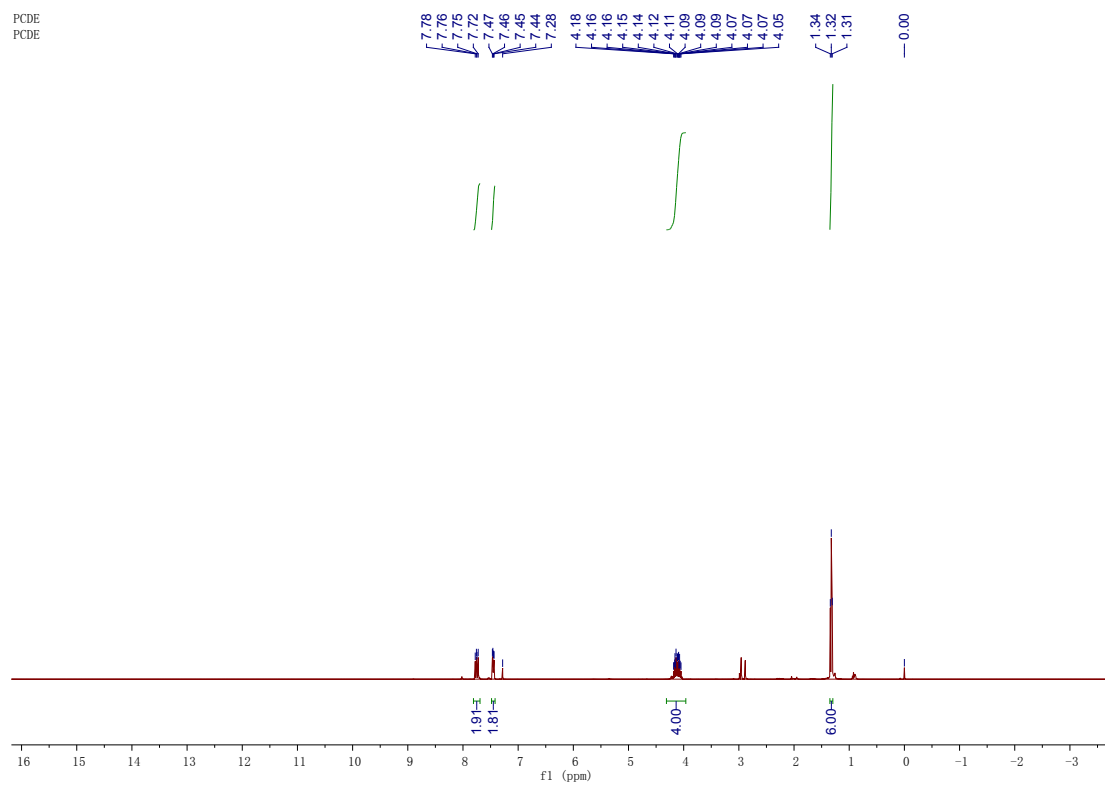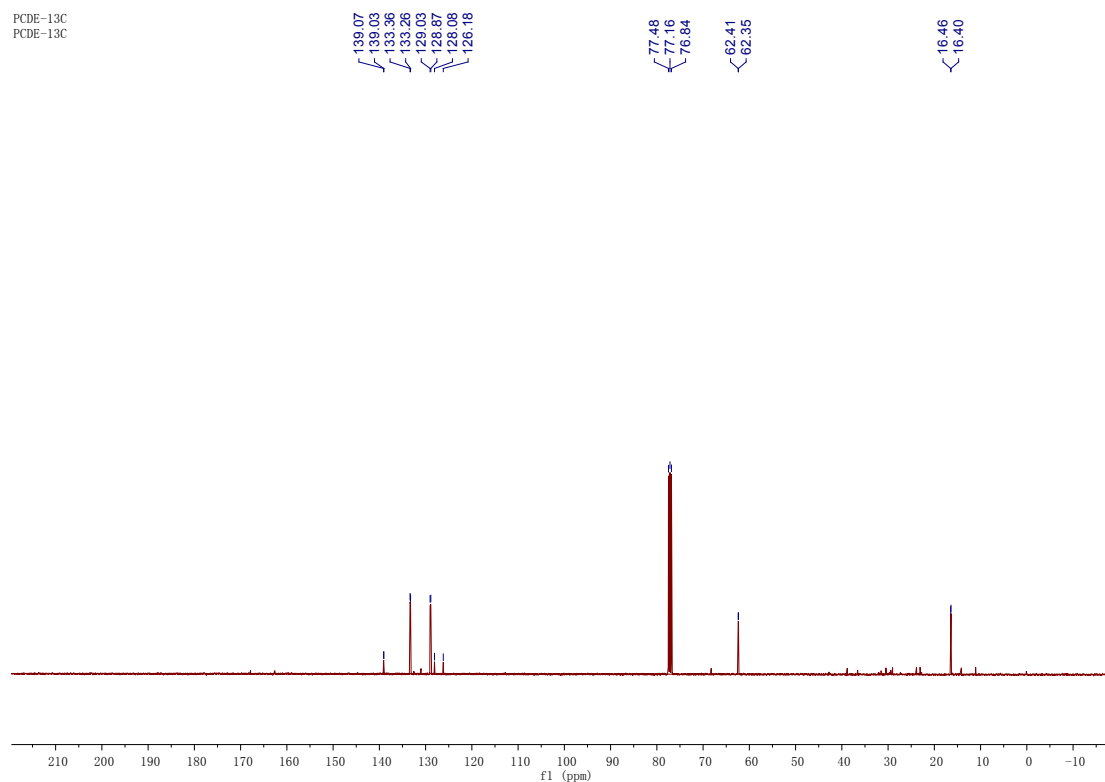

3p

PCDE-31P  
PCDE-31P

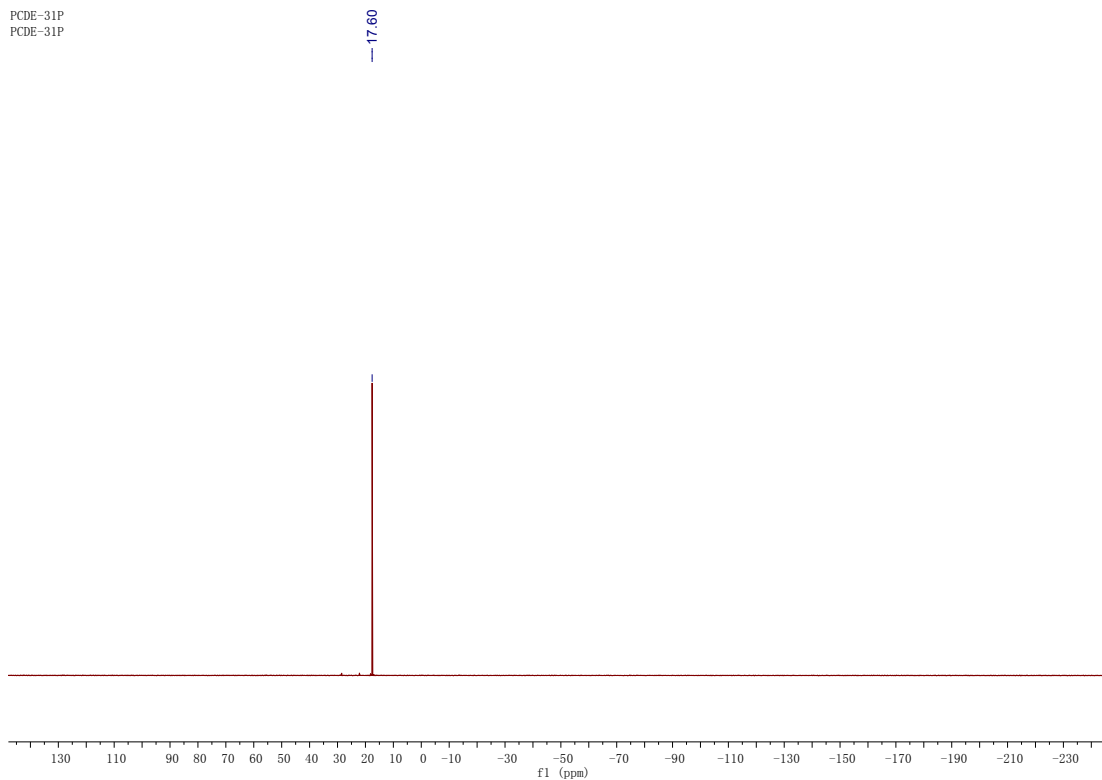

2013-12-04-4-Cl-Ph-P(O)(OEt)2 #565 RT: 9.37 AV: 1 NL: 6.06E6  
T: + c Full ms [50.00-600.00]

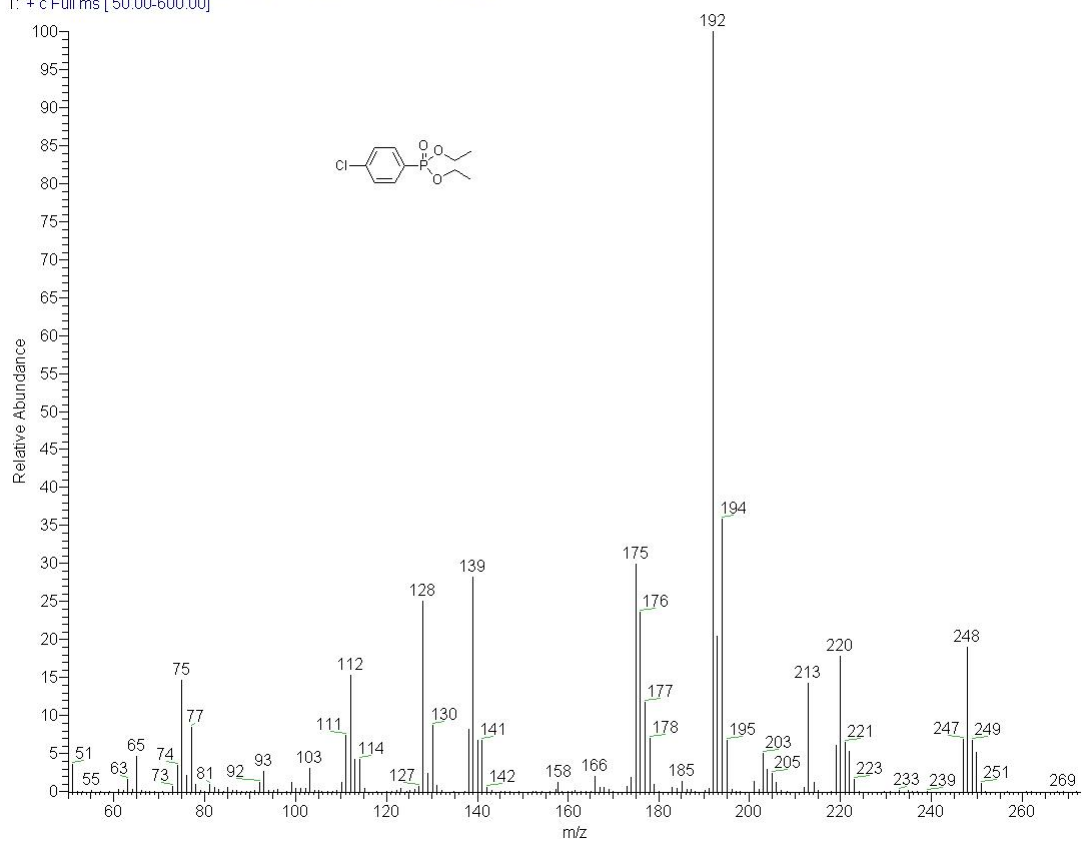

3q

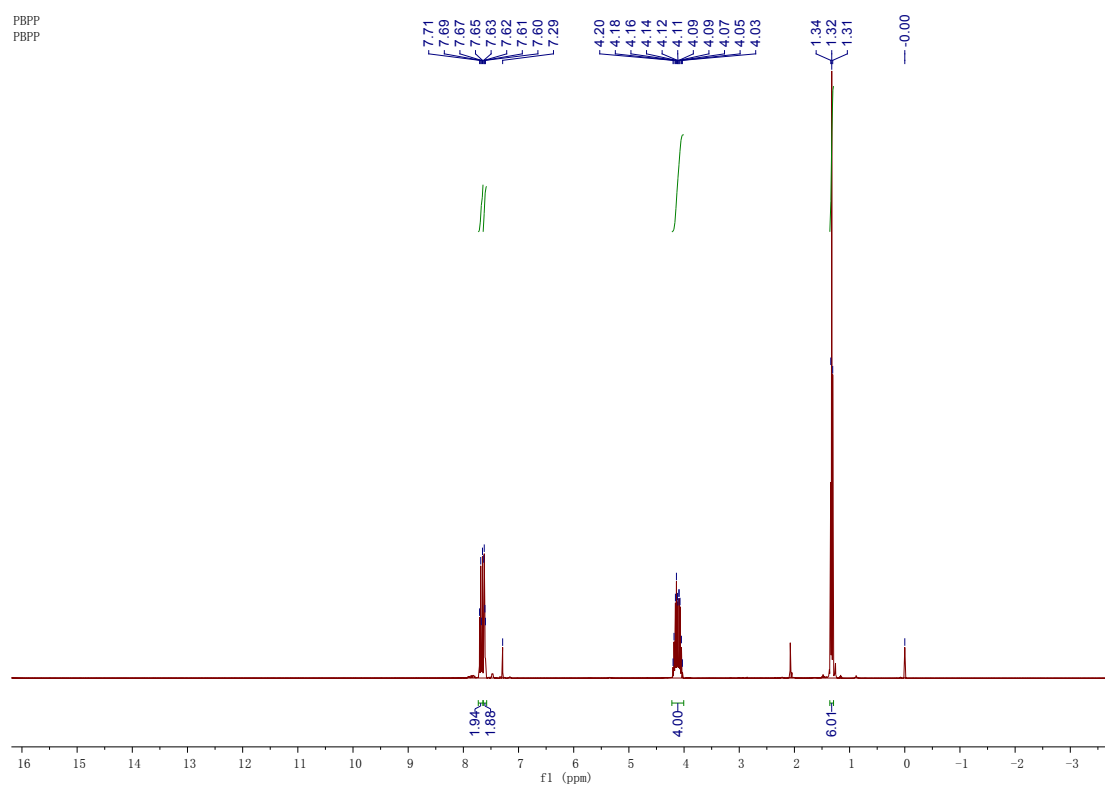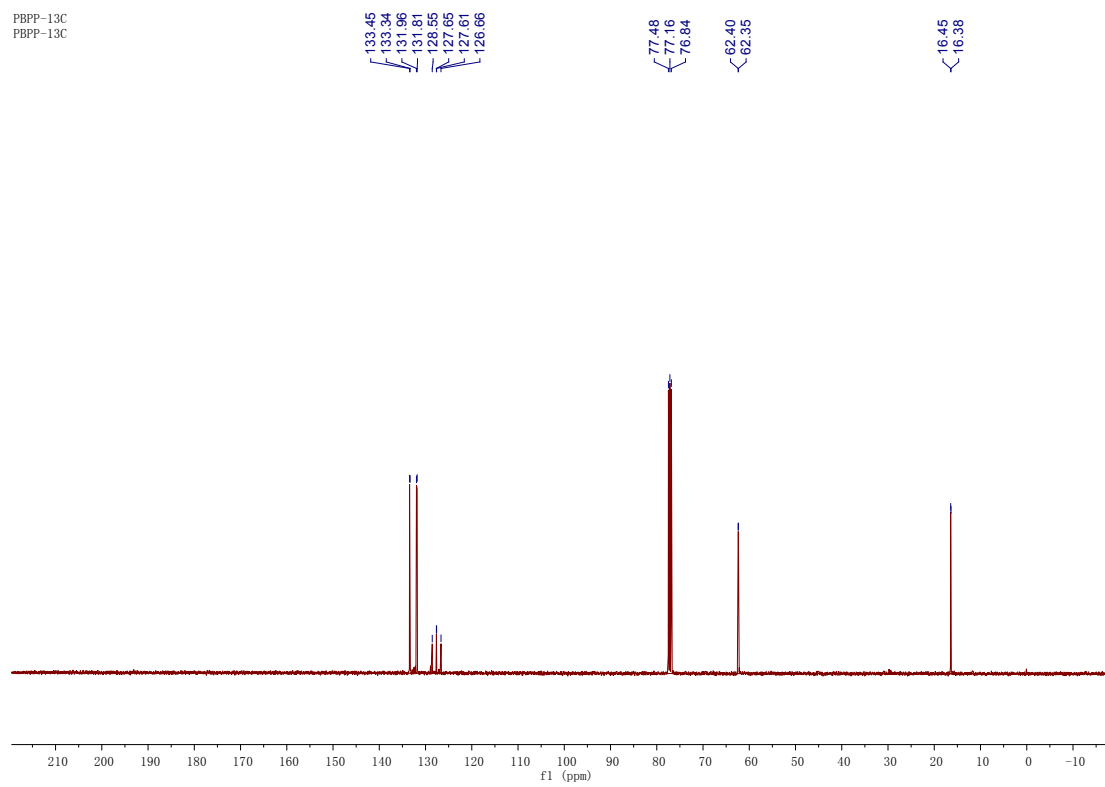



3q

PBPP-31P  
PBPP-31P

— 17.73

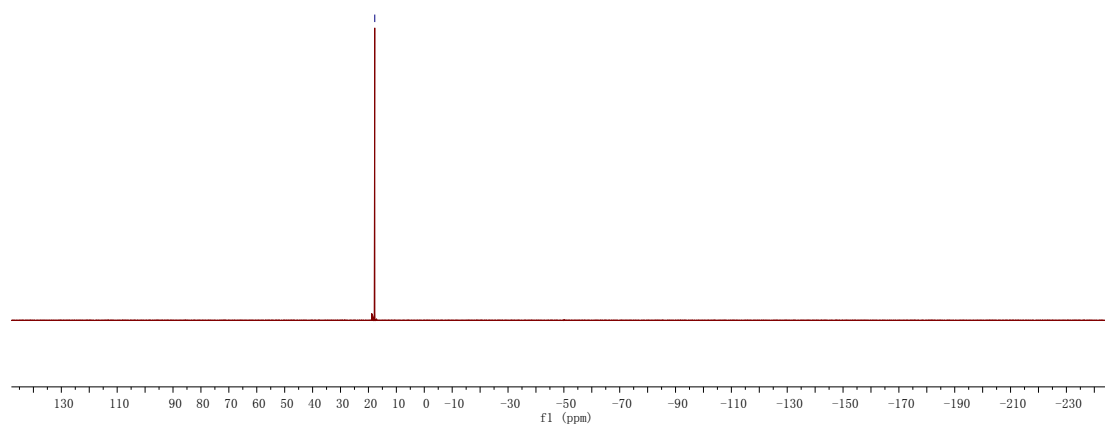

2013-12-04-4-Br-Ph-P(O)(OEt)2-Plot2 #630 RT: 9.93 AV: 1 NL: 2.75E6  
T: + c Full ms [50.00-600.00]

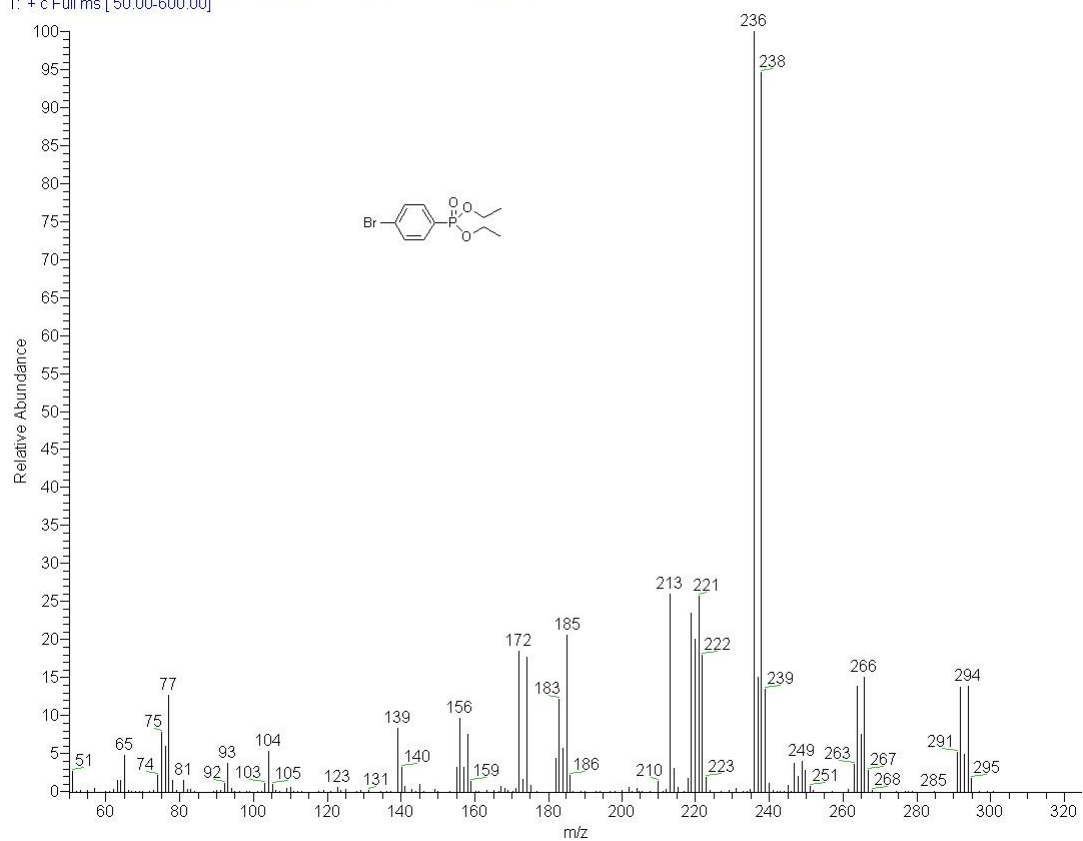

3r

PNPP-2  
PNPP-2

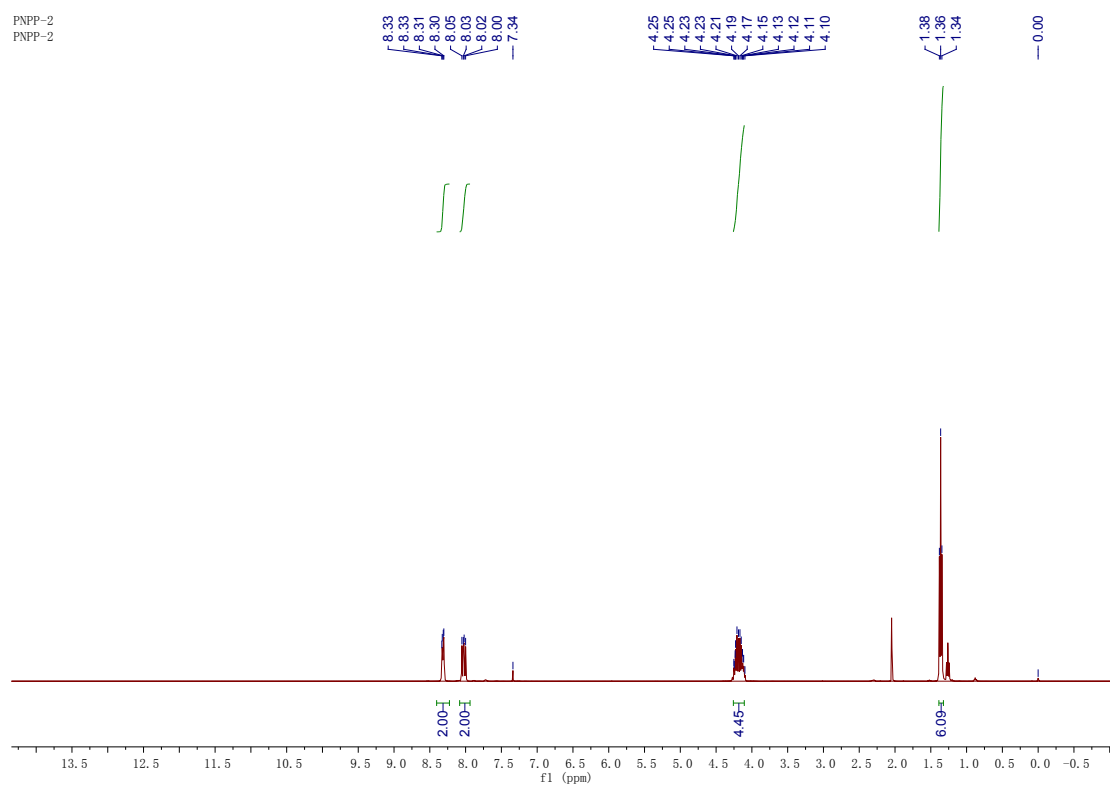

PNPP-2-13C  
PNPP-2-13C

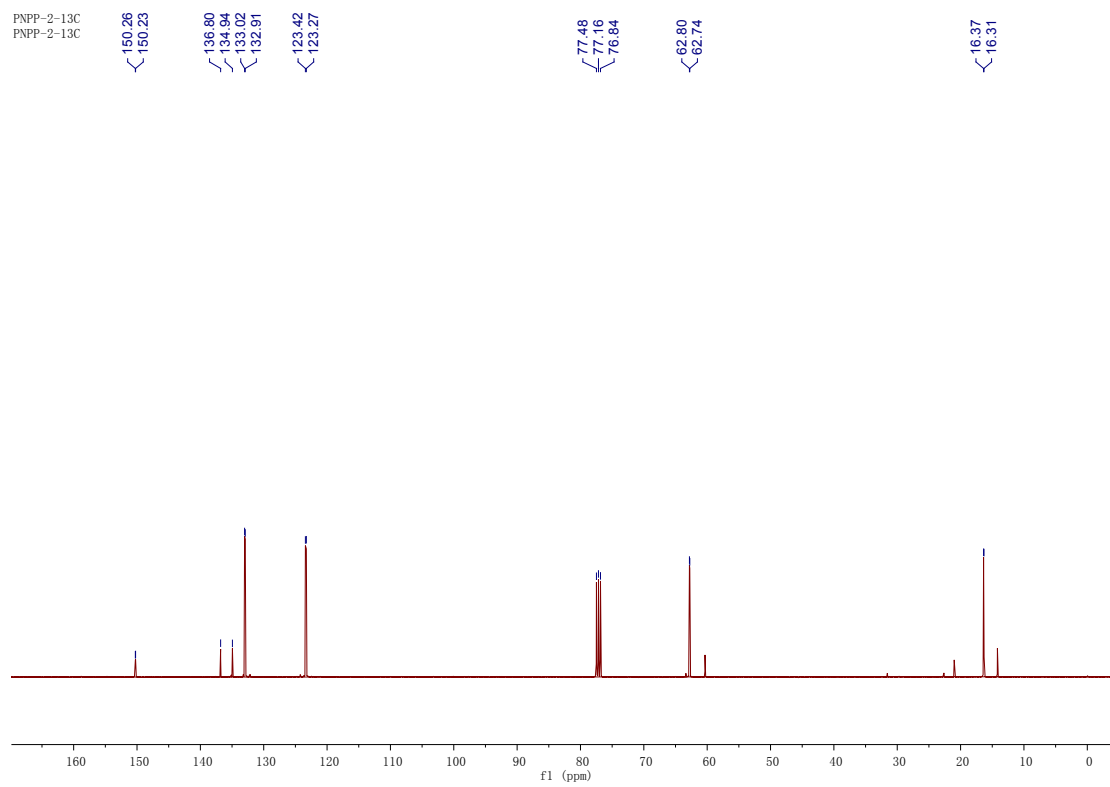

3r

PNPP-2-31P  
PNPP-2-31P

14.86

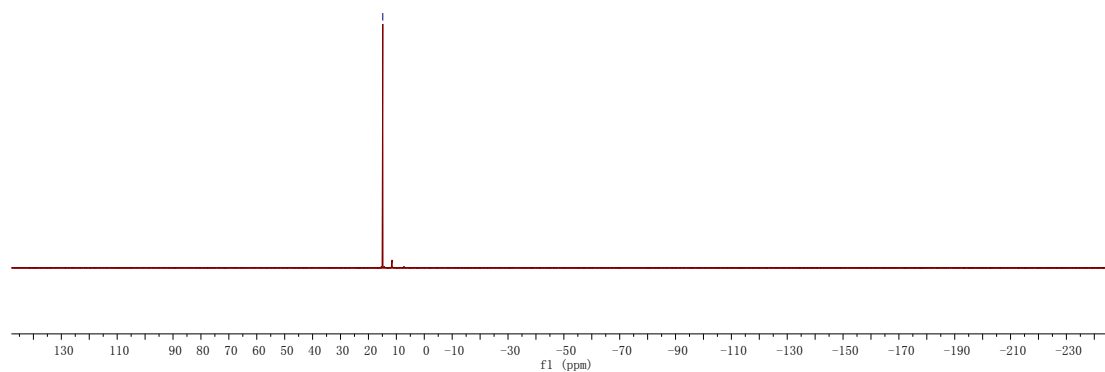

2013-12-06-4-NO2-Ph-P(O)(OEt)2 #680 RT: 10.50 AV: 1 NL: 6.20E4  
T: + c Full ms [50.00-600.00]

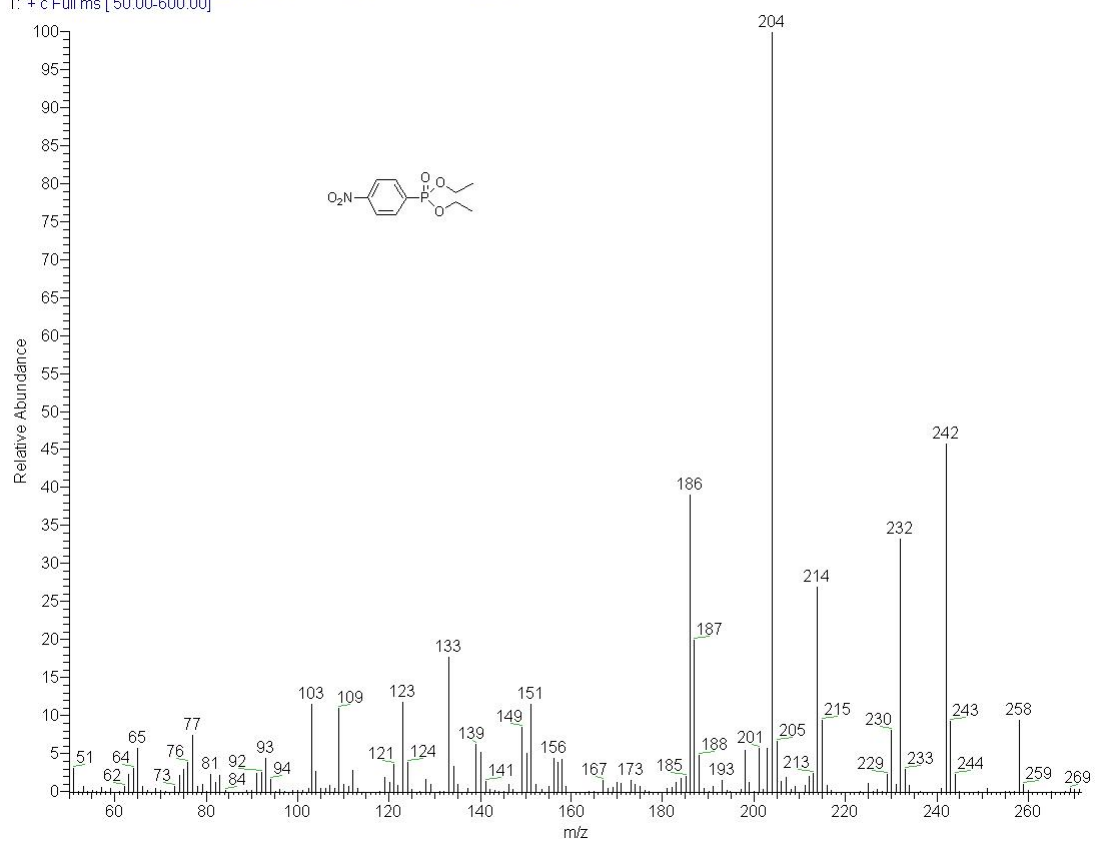

3s

PTFMPP  
PTFMPP

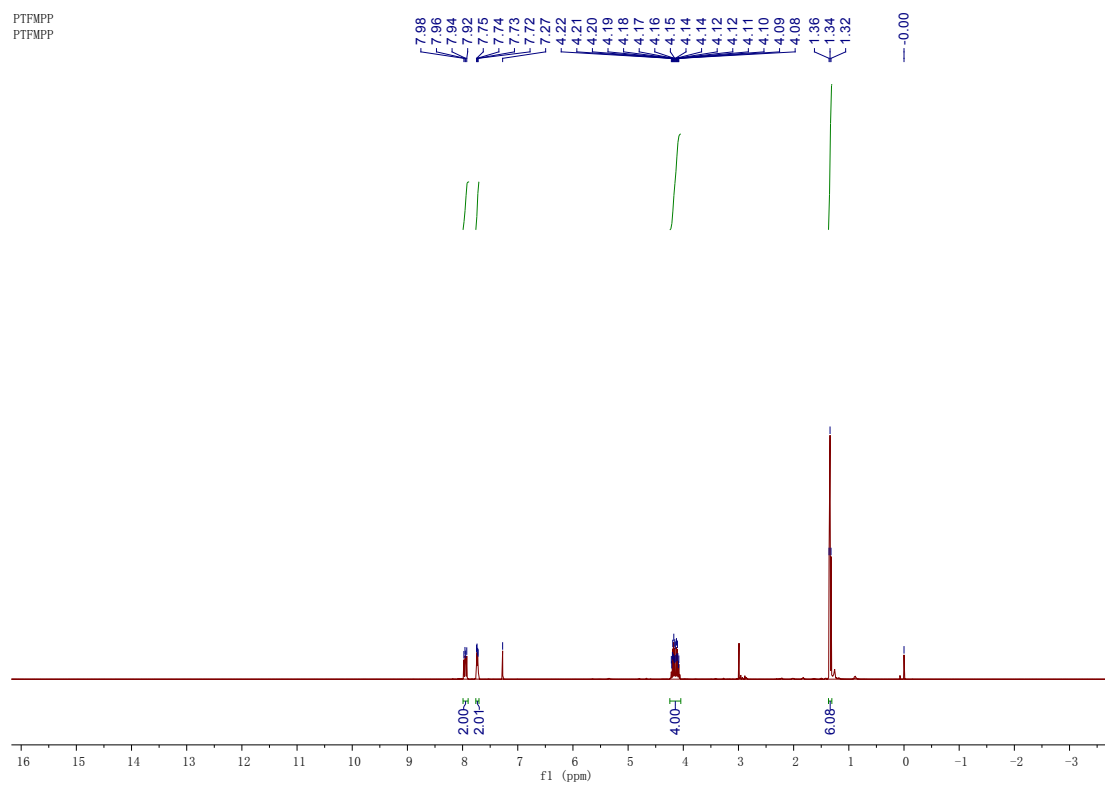

PTFMPP-13C  
PTFMPP-13C

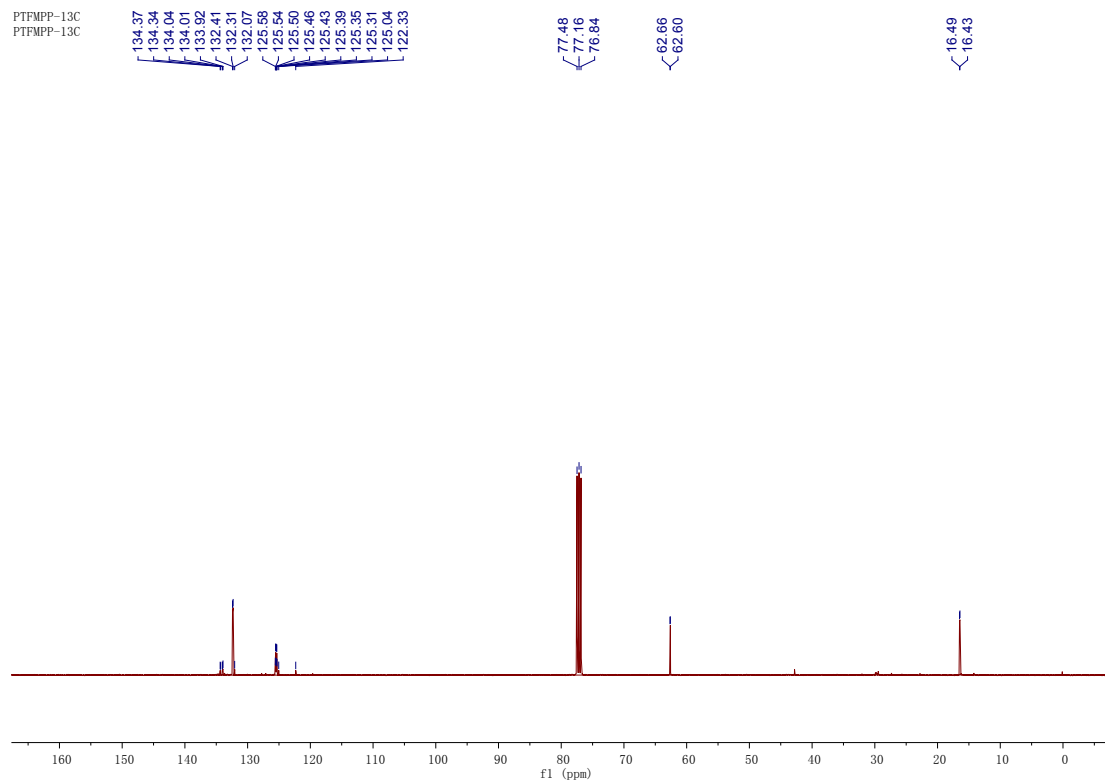

3s

PTFMPP-31P  
PTFMPP-31P

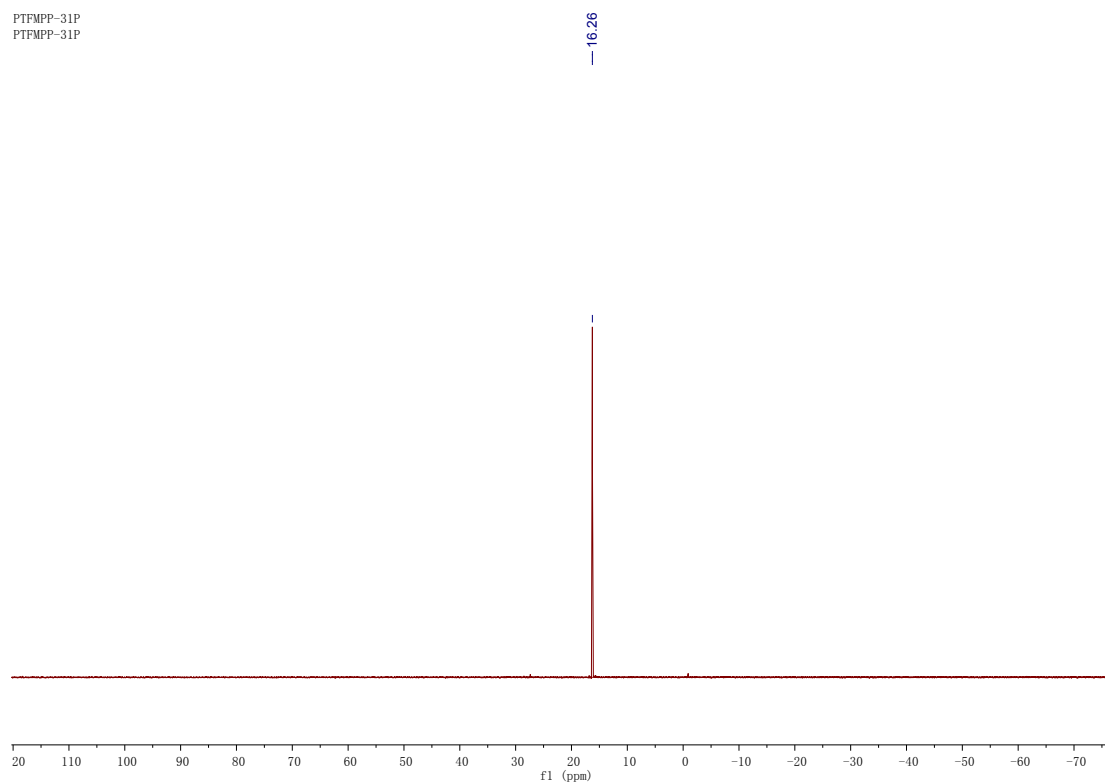

2013-12-08-4-CF3-Ph-P(O)(OEt)2-purify-1 #425 RT: 8.00 AV: 1 NL: 4.35E6  
T: + c Full ms [ 50.00-600.00]

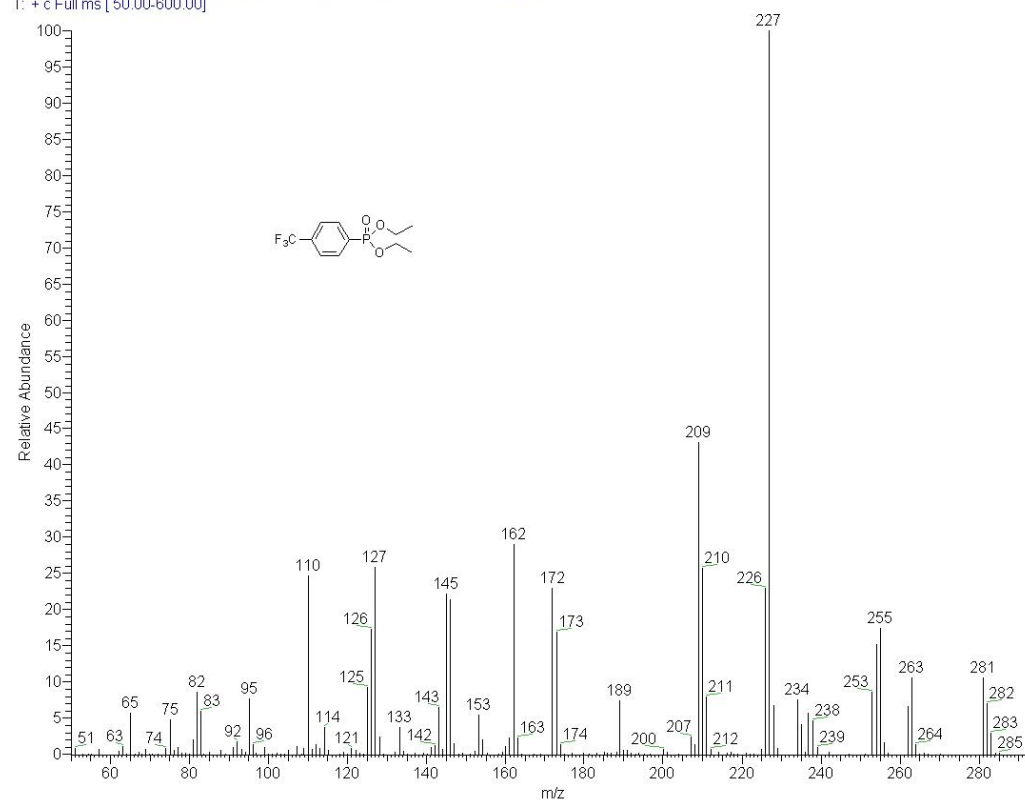

3t

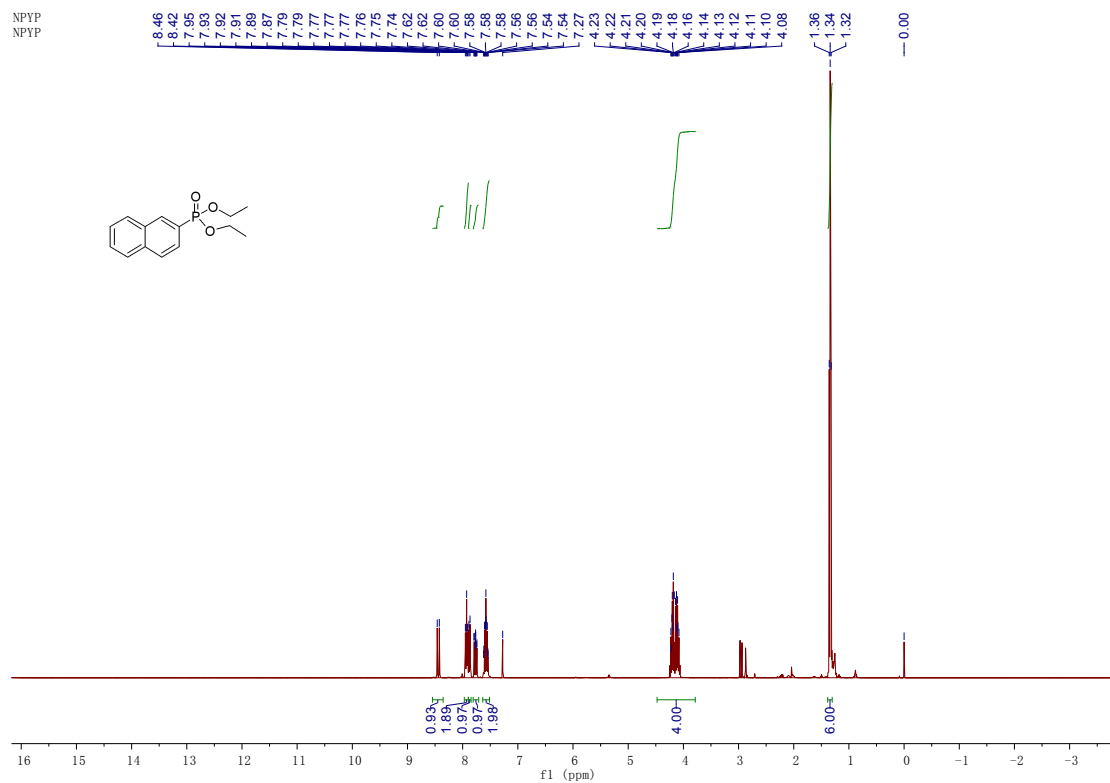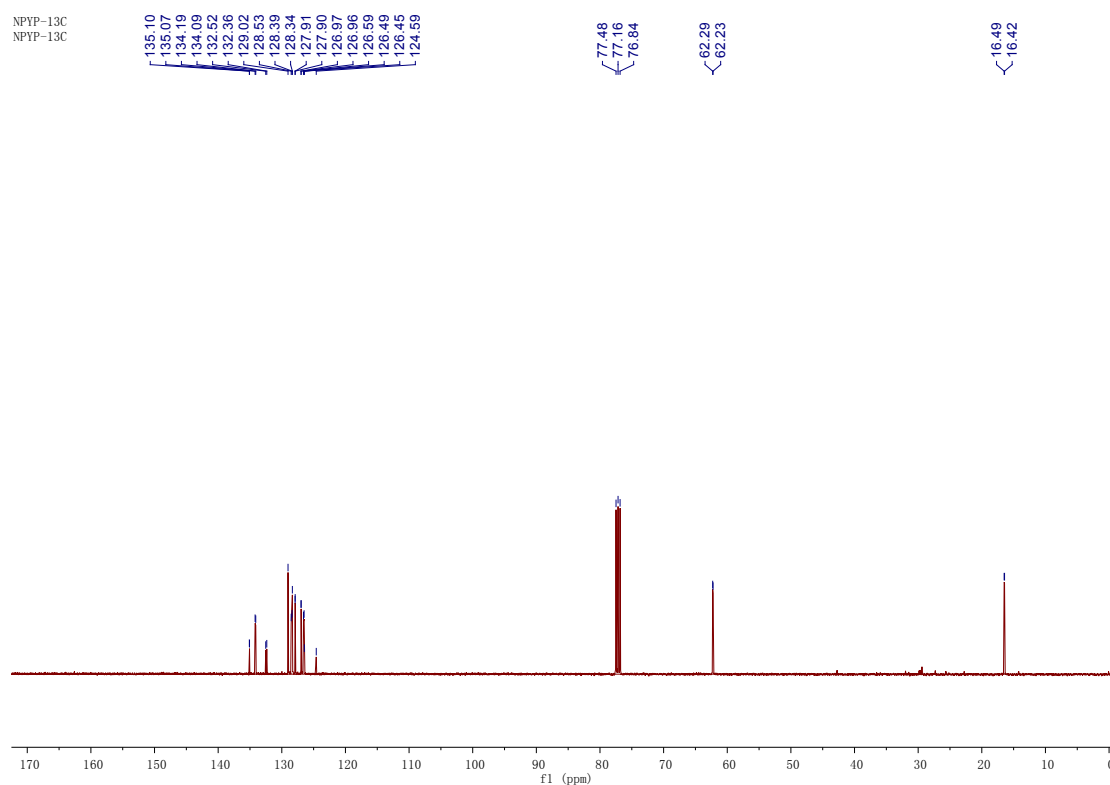

3t

NPYP-31P  
NPYP-31P

19.08

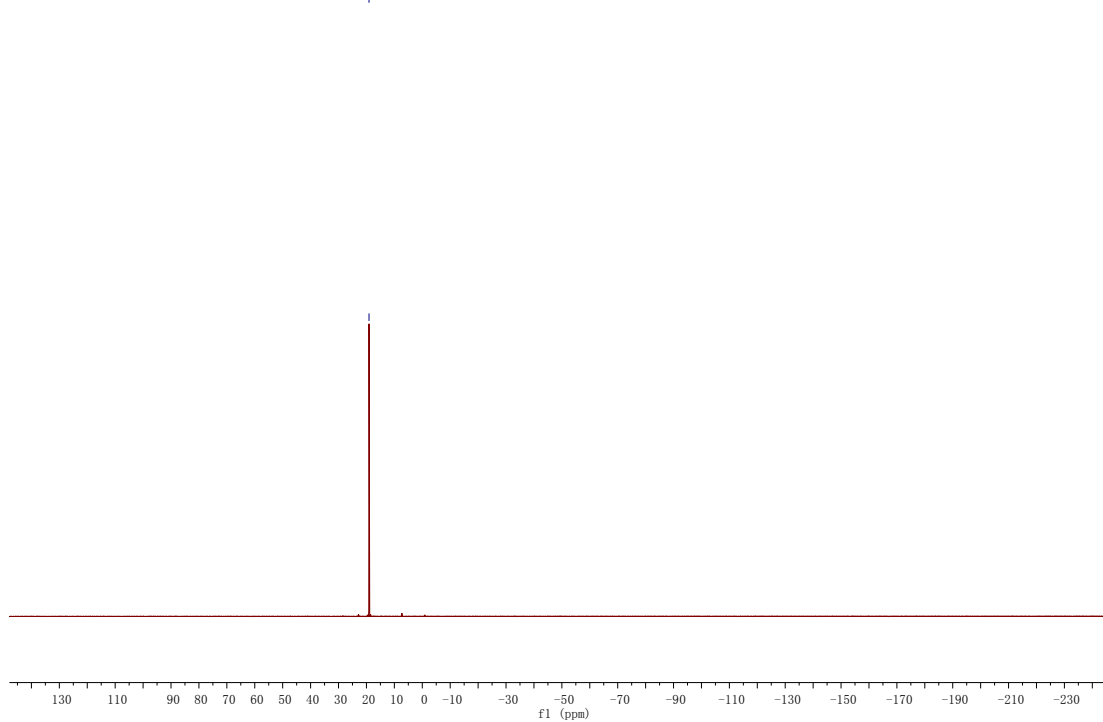

2013-12-08-2-Naph-Ph-P(O)(OEt)2 #797 RT: 11.52 AV: 1 NL: 7.95E6  
T: + c Full ms [ 50.00-600.00]

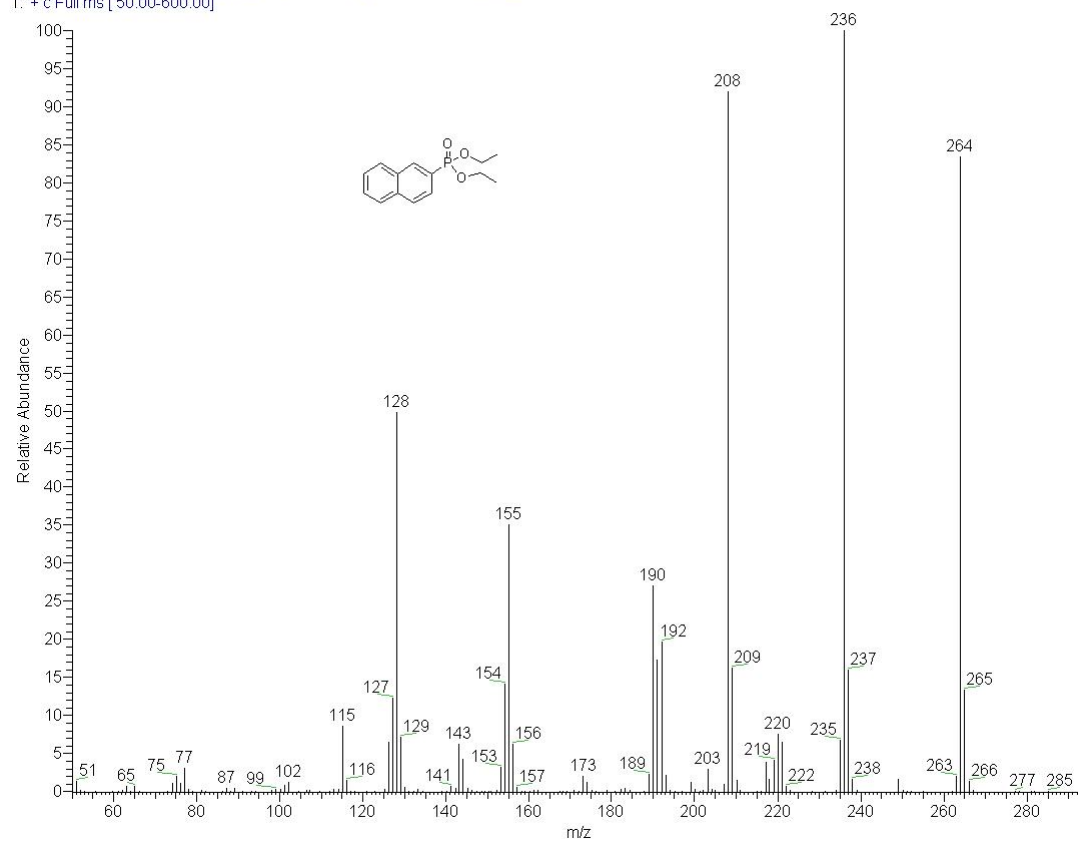

Supplement: c4ra01270d1.pdf [file c4ra01270d1.pdf]
